# Supplementary material for: On the time scale of meteorological, soil moisture, and snow drought indices to assess streamflow drought over catchments with different hydrological regime: a case study using a hundred Chilean catchments
Source: Copernicus journal article supplement (doi:10.5194/egusphere-2023-1911), 2023-08-24
Supplement: Supplementary file 1 [file egusphere-2023-1911-supplement-version3.pdf]

# Supplementary Material for manuscript "On the timescale of drought indices for monitoring streamflow drought considering catchment hydrological regimes"

Oscar M. Baez-Villanueva<sup>1,2</sup>, Mauricio Zambrano-Bigiarini<sup>3,4,\*</sup>, Diego G. Miralles<sup>1</sup>, Hylke E. Beck<sup>5</sup>, Jonatan F. Siegmund<sup>6</sup>, Camila Alvarez-Garreton<sup>4</sup>, Koen Verbist<sup>7</sup>, René Garreaud<sup>8,4</sup>, Juan Pablo Boisier<sup>8,4</sup>, and Mauricio Galleguillos<sup>9,4</sup>

<sup>1</sup>Hydro-Climate Extremes Lab (H-CEL), Ghent University, Ghent, Belgium

<sup>2</sup>Institute for Technology and Resources Management in the Tropics and Subtropics (ITT), TH Köln, Cologne, Germany

<sup>3</sup>Department of Civil Engineering, Universidad de la Frontera, Temuco, Chile

<sup>4</sup>Center for Climate and Resilience Research, Universidad de Chile, Santiago, Chile

\*Corresponding author

<sup>5</sup>Climate and Livability Initiative, Physical Sciences and Engineering, King Abdullah University of Science and Technology, Thuwal, Saudi Arabia

<sup>6</sup>Ernst & Young GmbH, Wirtschaftsprüfungsgesellschaft, Stuttgart, Germany

<sup>7</sup>UNESCO International Hydrological Programme, Paris, France

<sup>8</sup>Department of Geophysics, Universidad de Chile, Santiago, Chile

<sup>9</sup>Faculty of Engineering and Sciences, Universidad Adolfo Ibáñez, Santiago, Chile

# 1. Selection of soil moisture and SWE products

To our knowledge, there has not been a comprehensive evaluation of soil moisture and *SWE* datasets over Chile. Therefore, we included four different soil moisture datasets to calculate the ESSMI and two to calculate the SWEI to account for their uncertainty. Specifically, we used ERA5 (Hersbach et al., 2020), ERA5-Land (Muñoz-Sabater et al., 2021), SMAP-L3E (O'Neill et al., 2016), and SMAP-L4SM (Reichle et al., 2018) to compute the ESSMI at different scales (1, 3, 6, and 12 months) and ERA5 and ERA5-Land to compute the SWEI (at 1, 3, and 6 months).

ERA5 (Hersbach et al., 2020) is an hourly reanalysis product that provides estimates of *P*, soil moisture at different depths (0–7, 7–28, 28–100, and 100–289 cm), and *SWE*, as well as other variables, from 1940 to the present with a spatial resolution of 0.25°. This product has a better representation of rain and snow than its predecessor, ERA-Interim, with a more realistic parameterisation of microphysics and mixed-phase clouds (Hersbach et al., 2020). Although ERA5 has a relatively coarse spatial resolution compared to other products, we included it in the analysis because reanalysis products tend to outperform purely observational datasets in high latitudes (Beck et al., 2017; Baez-Villanueva et al., 2021). The soil moisture depth used in this study is 0–7 cm for consistency with the other soil moisture products.

The National Aeronautics and Space Administration (NASA) Soil Moisture Active Passive (SMAP) mission originally aimed to provide global measurements of soil moisture and freeze/thaw state using an L-band (active) radar and an L-band (passive) radiometer (Entekhabi et al., 2010). After the failure of the radar in early 2015, the radiometer remained as the only on-board sensor providing measurements (Chan et al., 2016). The SMAP mission incorporated radio frequency interference detection and mitigation to provide more continuous high-quality estimates of soil moisture (Oliva et al., 2012; Mohammed et al., 2016). The observed radiometric brightness *T* comes from the land surface L-band emission, and is thus determined by the physical *T* and dielectric constant of the respective scene, which is related to soil moisture in the top ~5 cm surface soil moisture (Entekhabi et al., 2014).

The enhanced level-3 SMAP soil moisture product (SMAP-L3E; Entekhabi et al., 2010; O'Neill et al., 2016) provides global daily estimates of soil moisture derived from the SMAP level-1C interpolated brightness *T* with a 2–3 day average revisiting time. The SMAP level-4 soil moisture product (SMAP-L4SM; Entekhabi et al., 2010; Reichle et al., 2018) assimilates brightness *T* observations into the Goddard Earth Observing System (GEOS) Catchment land surface model. It has been validated against numerous ground-based measurements (Tavakol et al., 2019; Beck et al., 2021) and provides global 3-hourly volumetric soil moisture estimates of the top 5 cm.

To select a specific soil moisture and *SWE* product, we performed a simple correlation analysis between these indices at their respective temporal scales and the SSI-1. The selection of the products (one for each variable) was made considering the highest correlation and longest time series of the products, as we aim to assess the ability of these indices to serve as a proxy for streamflow droughts. The selection of these products was based on the assumption that the product with the highest correlation with the SSI-1 represents better the spatio-temporal patterns of each variable across Chile. This assumption is not too far from reality since *i*) a correlation between different components of the water cycle at the monthly scale could indicate

agreement between the gridded products and in-situ  $Q$  data, and *ii*) any systematic bias that the products may present do not  
 35 affect the computation of the standardised drought indices.

Table S1 shows the cross-correlation values for all indices and the SSI-1. For the case of soil moisture, SMAP-L4SM has  
 slightly better overall median cross-correlation values between ESSMI and SSI-1 (0.51), while ERA5 and ERA5 Land closely  
 follow SMAP-L4SM (both products with a value of 0.50). However, ERA5 Land was selected as the best soil moisture product  
 to compute the ESSMI drought index because *i*) SMAP-L4SM is only available from 2015, which is much than the 32 years  
 40 of record of ERA5-Land (although its evaluation starts in 1983) instead of gaining 0.01 in the cross-correlation evaluation, and  
*ii*) although ERA5 performed similarly to ERA5-Land, the latter has a higher spatial resolution.

In the case of SWEI, ERA5-Land was selected because it had the highest overall cross-correlation values compared to ERA5,  
 and was therefore used to calculate the ESSMI and SWEI in the manuscript. Although Muñoz-Sabater et al. (2021) found mixed  
 performance of ERA5 Land related to  $SWE$  for some geographical locations and altitudes of the world, the product presents  
 45 coherent  $SWE$  fields over continental Chile, which are very similar to those of ERA5.

**Table S1.** Median correlation values between the ESSMI and SWEI, and the SSI-1 over the 100 near-natural catchments presented in Figure 1  
 of the manuscript for 1979–2020.

| Index | Product   | Pearson's correlation coefficient                               |
|-------|-----------|-----------------------------------------------------------------|
| ESSMI | ERA5      | Scale 1 (0.50); Scale 3 (0.49); Scale 6 (0.42); Scale 12 (0.30) |
|       | ERA5-Land | Scale 1 (0.50); Scale 3 (0.47); Scale 6 (0.42); Scale 12 (0.29) |
|       | SMAP-L3E  | Scale 1 (0.34); Scale 3 (0.36); Scale 6 (0.26); Scale 12 (0.17) |
|       | SMAP-L4SM | Scale 1 (0.51); Scale 3 (0.39); Scale 6 (0.27); Scale 12 (0.07) |
| SWEI  | ERA5      | Scale 1 (0.20); Scale 3 (0.21); Scale 6 (0.24)                  |
|       | ERA5-Land | Scale 1 (0.23); Scale 3 (0.21); Scale 6 (0.22)                  |

## 2. Conceptual figure of hydrological regimes

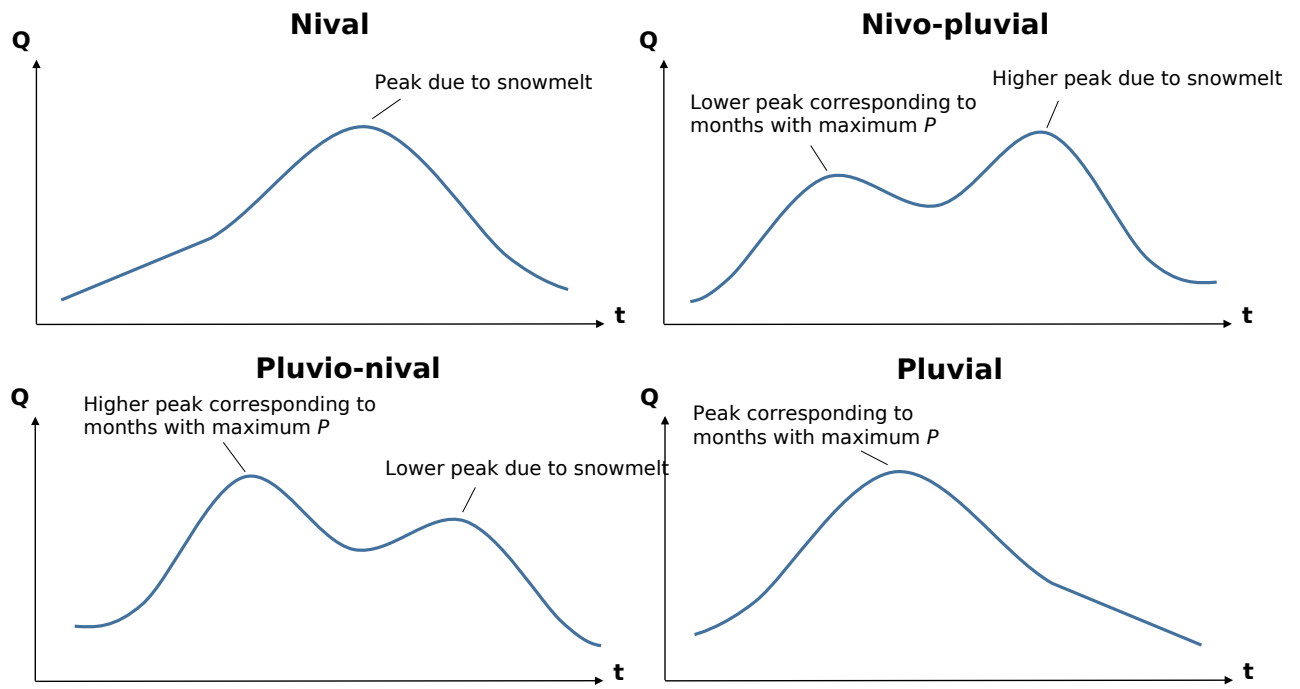

**Figure S1.** Conceptual illustration of the hydrological regimes used to classify the 100 near-natural catchments used in this study extracted from Baez-Villanueva et al. (2021).

### 3. Summary of scales with highest cross-correlation and event coincidence rates

**Table S2.** Median correlation (lag zero) and event coincidence rates for the selected indices and temporal scales with the highest values when calculated over 100 near-natural Chilean catchments.

| Index | Temporal scale | Cross-correlation | Event coincidence |             |
|-------|----------------|-------------------|-------------------|-------------|
|       |                |                   | thr=-1.0          | thr=-1.5    |
| SPI   | 3              | 0.57              | 0.52              |             |
|       | 6              | <b>0.58</b>       | <b>0.53</b>       | <b>0.46</b> |
|       | 9              | 0.57              | 0.50              | 0.45        |
| SPEI  | 3              | 0.52              | 0.50              |             |
|       | 6              | <b>0.52</b>       | <b>0.51</b>       | 0.41        |
|       | 9              |                   | 0.50              | 0.40        |
| ESSMI | 1              | <b>0.50</b>       | 0.27              |             |
|       | 3              | 0.47              | <b>0.31</b>       | 0.18        |
|       | 6              |                   | 0.29              | <b>0.21</b> |
| SWEI  | 1              | <b>0.23</b>       | 0.27              |             |
|       | 3              |                   | <b>0.29</b>       | <b>0.10</b> |
|       | 6              | 0.22              | 0.29              | 0.08        |

**Table S3.** Temporal scale with the highest median correlation values (lag zero) for SPI, SPEI, ESSMI and SWEI calculated over 100 near-natural Chilean catchments. The number presented in parenthesis indicates the numeric value of the linear cross-correlation at the given temporal scale.

|       | <b>Nival</b>     | <b>Nivo-pluvial</b> | <b>Pluvio-Nival</b> | <b>Pluvial</b>  |
|-------|------------------|---------------------|---------------------|-----------------|
| SPI   | <b>12</b> (0.75) | <b>12</b> (0.52)    | <b>3</b> (0.73)     | <b>3</b> (0.66) |
|       | 18 (0.75)        | 6 (0.51)            | 6 (0.79)            | 1 (0.53)        |
|       | 24 (0.73)        | 3 (0.51)            |                     |                 |
|       |                  | 9 (0.48)            |                     |                 |
| SPEI  | 12 (0.58)        | <b>3</b> (0.48)     | <b>3</b> (0.68)     | <b>3</b> (0.63) |
|       | <b>18</b> (0.60) | 6 (0.43)            | 1 (0.67)            | 1 (0.55)        |
|       | 24 (0.59)        | 12 (0.43)           | 6 (0.66)            |                 |
|       |                  | 1 (0.38)            |                     |                 |
|       |                  | 9 (0.36)            |                     |                 |
| ESSMI | <b>6</b> (0.53)  | <b>3</b> (0.49)     | <b>1</b> (0.55)     | <b>1</b> (0.52) |
|       | 3 (0.48)         | 1 (0.48)            | 3 (0.50)            |                 |
|       | 1 (0.38)         |                     |                     |                 |
| SWEI  | <b>1</b> (0.38)  | <b>1</b> (0.25)     | <b>1</b> (0.25)     | <b>3</b> (0.10) |

**Table S4.** Temporal scale with the highest median precursory coincidence rates for SPI, SPEI, ESSMI and SWEI calculated over 100 near-natural Chilean catchments. Numbers in parentheses indicate the numeric value of the precursory coincidence rate at the given temporal scale. This table corresponds to moderate drought events ( $thr = -1.0$ ).

|       | <b>Nival</b>     | <b>Nivo-pluvial</b> | <b>Pluvio-Nival</b> | <b>Pluvial</b>  |
|-------|------------------|---------------------|---------------------|-----------------|
| SPI   | <b>24</b> (0.74) | 6 (0.48)            | <b>6</b> (0.68)     | <b>3</b> (0.55) |
|       | 18 (0.68)        | 9 (0.47)            |                     |                 |
|       |                  | 12 (0.46)           |                     |                 |
| SPEI  | <b>18</b> (0.52) | <b>9</b> (0.50)     | <b>3</b> (0.60)     | <b>3</b> (0.49) |
|       |                  | 6 (0.49)            | 1 (0.55)            |                 |
|       |                  | 12 (0.45)           |                     |                 |
| ESSMI | <b>1</b> (0.23)  | <b>1</b> (0.26)     | <b>3</b> (0.37)     | <b>6</b> (0.38) |
|       | 3 (0.22)         |                     |                     | 3 (0.37)        |
| SWEI  | -                | -                   | -                   | -               |

**Table S5.** Temporal scale with the highest median precursory coincidence rates for SPI, SPEI, ESSMI and SWEI calculated over 100 near-natural Chilean catchments. Numbers in parentheses indicate the numeric value of the precursory coincidence rate at the given temporal scale. This table corresponds to severe drought events ( $thr = -1.5$ ).

|       | <b>Nival</b>     | <b>Nivo-pluvial</b> | <b>Pluvio-Nival</b> | <b>Pluvial</b>   |
|-------|------------------|---------------------|---------------------|------------------|
| SPI   | <b>24</b> (0.66) | <b>6</b> (0.32)     | <b>6</b> (0.73)     | -                |
|       |                  | 9 (0.31)            |                     |                  |
|       |                  | 3 (0.31)            |                     |                  |
| SPEI  | <b>12</b> (0.25) | <b>6</b> (0.32)     | <b>6</b> (0.48)     | <b>12</b> (0.30) |
|       |                  | 9 (0.31)            | 3 (0.47)            |                  |
|       |                  | 12 (0.30)           |                     |                  |
| ESSMI | -                | -                   | <b>6</b> (0.25)     | <b>1</b> (0.23)  |
|       |                  |                     | 3 (0.23)            | 3 (0.22)         |
| SWEI  | -                | -                   | -                   | -                |

# 3 All catchments — Boxplots for different temporal scales

50 and lag times



### 3.1 Cross-correlation

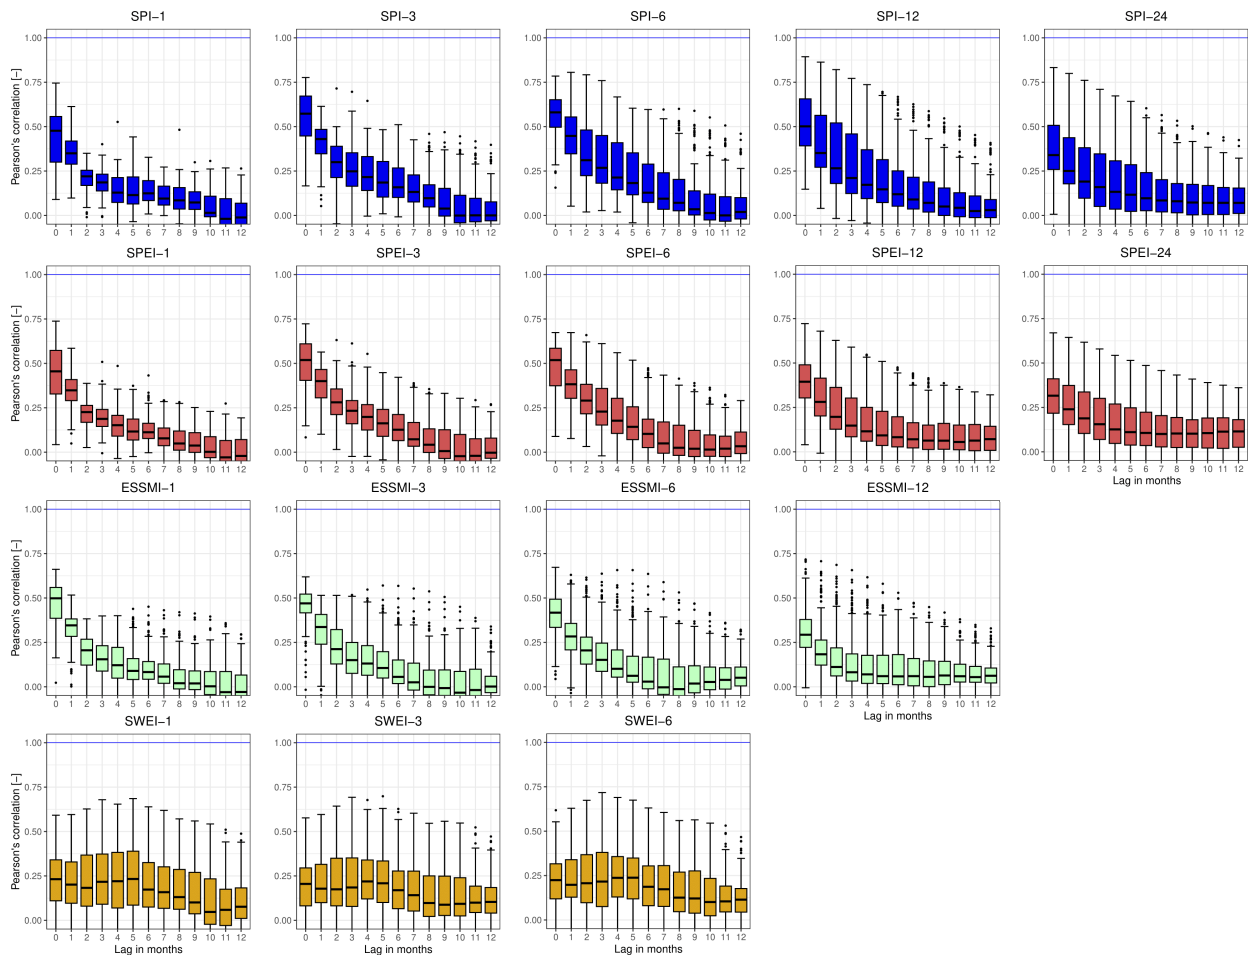

**Figure S2.** cross-correlation among the selected drought indices (SPI, SPEI, ESSMI, SWEI) and the SSI-1, for different temporal scales (from 1 to 24 months) and lag times (from 0 to 12 months). The solid coloured boxplots indicate lags where at least 75% of the catchments presented significant results at the 95% confidence interval, while the white boxplots indicate the opposite. The blue line indicates the optimal cross-correlation. The solid line within each box represents the median value, the edges of the boxes represent the first and third quartiles, and the whiskers extend to the most extreme data point which is no more than 1.5 times the interquartile range from the box.

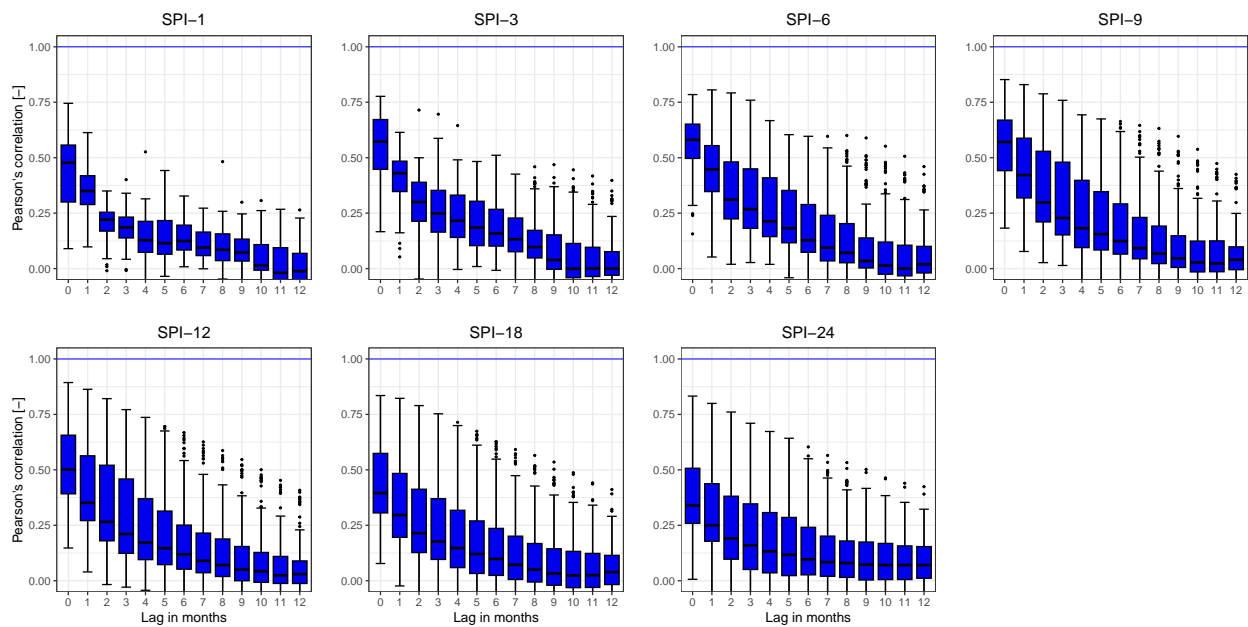

**Figure S3.** cross-correlation results between the SPI and the SSI-1 at different lag periods (ranging from 0 to 12 months). The blue line indicates the optimal cross-correlation. The solid line within each box represents the median value, the edges of the boxes represent the first and third quartiles, and the whiskers extend to the most extreme data point which is no more than 1.5 times the interquartile range from the box.

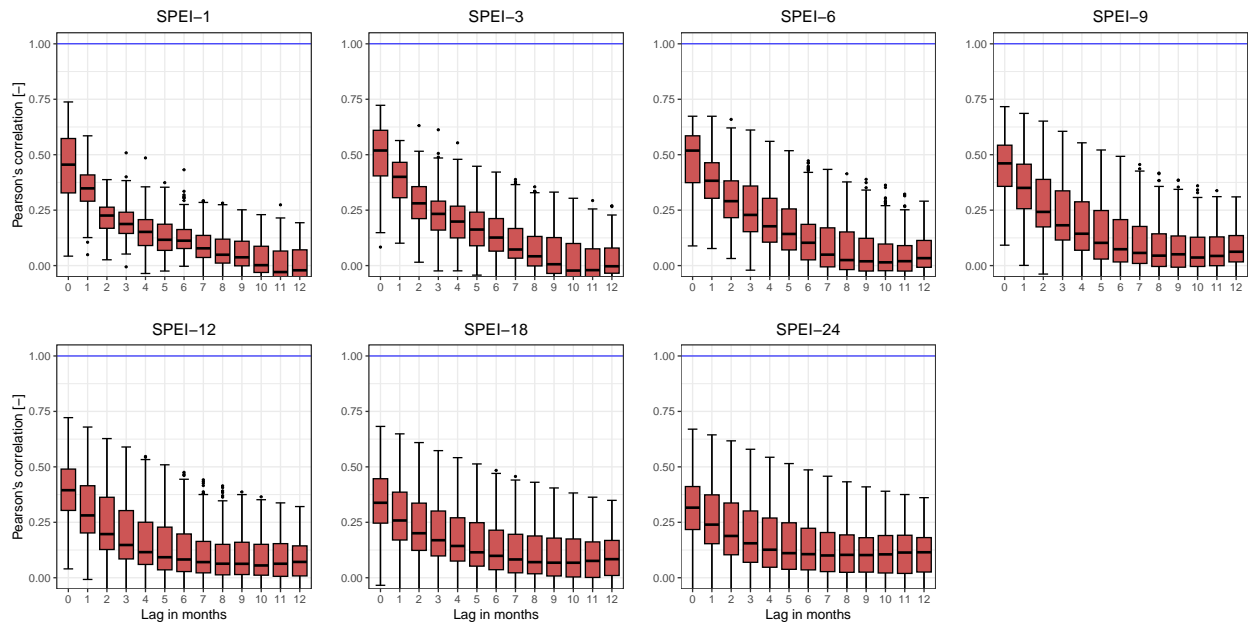

**Figure S4.** cross-correlation results between the SPEI and the SSI-1 at different lag periods (ranging from 0 to 12 months). The blue line indicates the optimal cross-correlation. The solid line within each box represents the median value, the edges of the boxes represent the first and third quartiles, and the whiskers extend to the most extreme data point which is no more than 1.5 times the interquartile range from the box.

## **3.2 Event coincidence analysis**

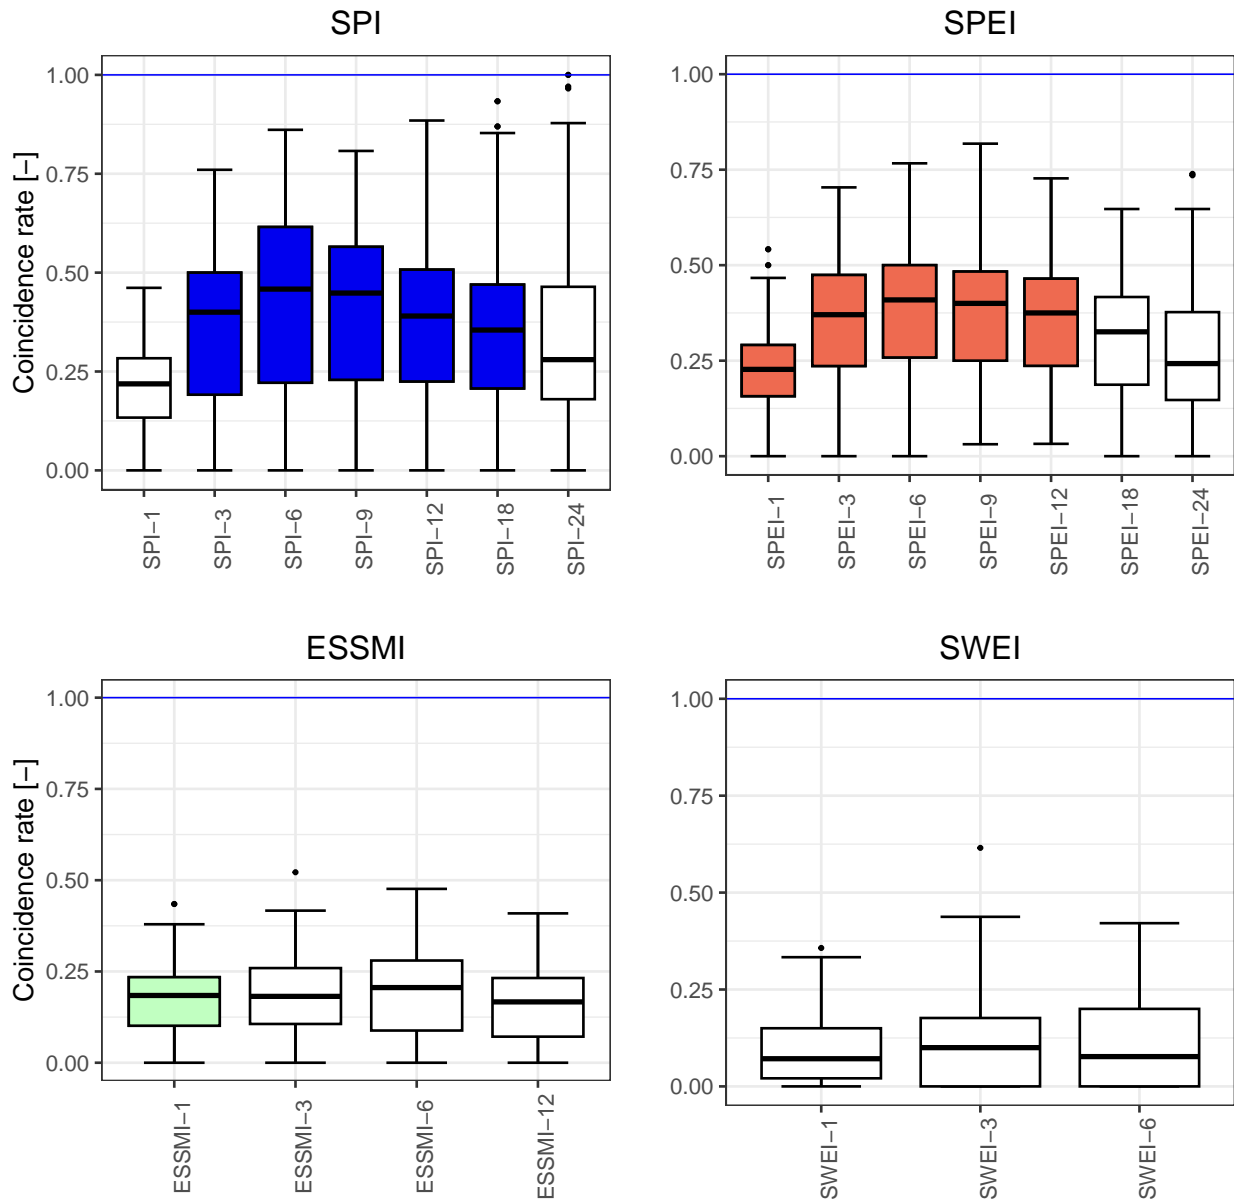

**Figure S5.** Event coincidence analysis results of the selected drought indices and the SSI-1 at a lag of zero months for severe droughts ( $thr = -1.5$ ). The coloured boxplots indicate lags where at least 75% of the catchments presented significant results at the 95% confidence interval, while the white boxplots indicate the opposite. The blue line indicates the optimal cross-correlation. The solid line within each box represents the median value, the edges of the boxes represent the first and third quartiles, and the whiskers extend to the most extreme data point which is no more than 1.5 times the interquartile range from the box.

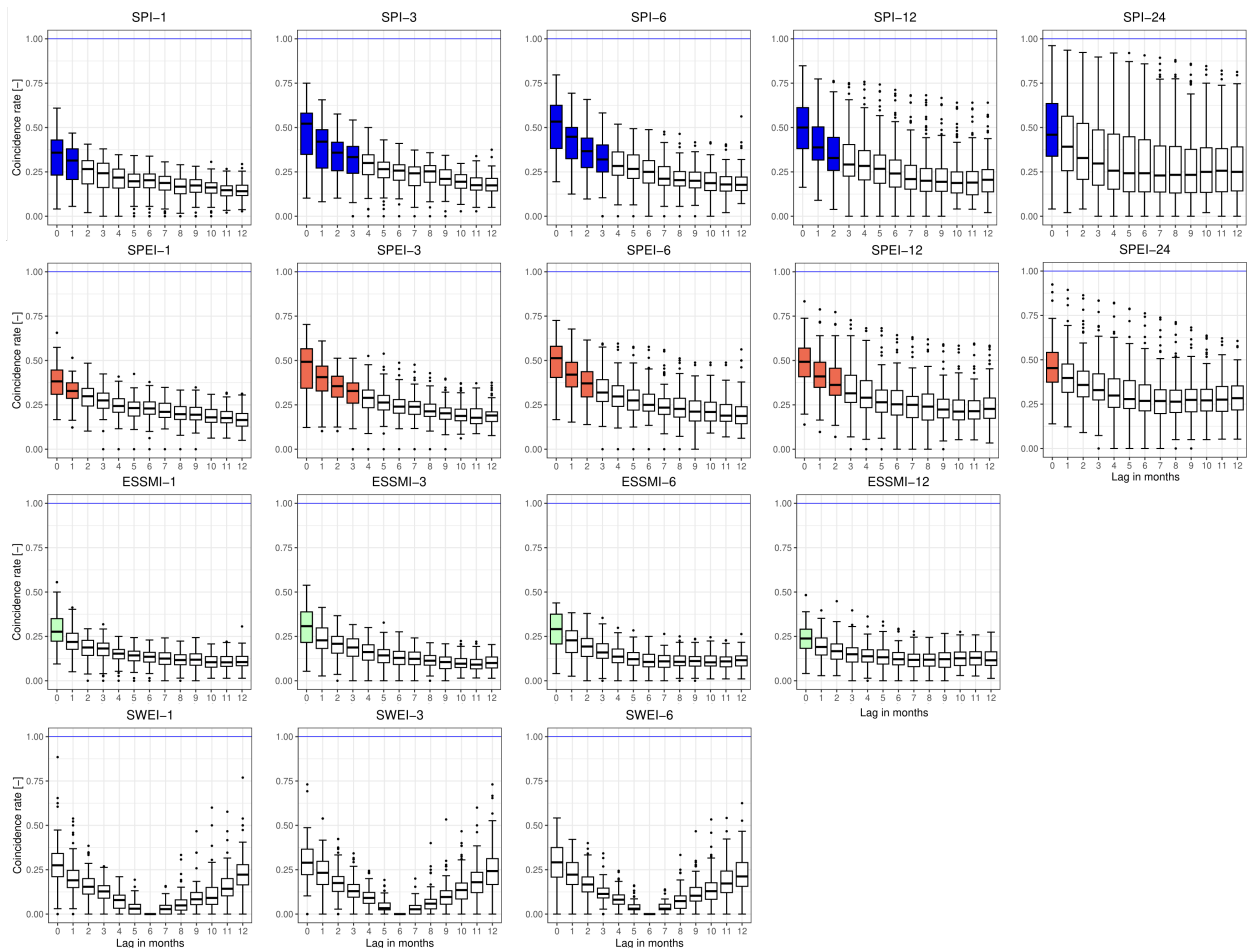

**Figure S6.** Event coincidence analysis results of the selected drought indices and the SSI-1 at different lag periods (ranging from 0 to 12 months) for a threshold of -1.0 (moderate droughts). The solid coloured boxplots indicate those lags where at least 75% of the catchments presented significant results at the 95% confidence interval, while the white boxplots indicate the opposite. The blue line indicates the optimal cross-correlation. The solid line within each box represents the median value, the edges of the boxes represent the first and third quartiles, and the whiskers extend to the most extreme data point which is no more than 1.5 times the interquartile range from the box.

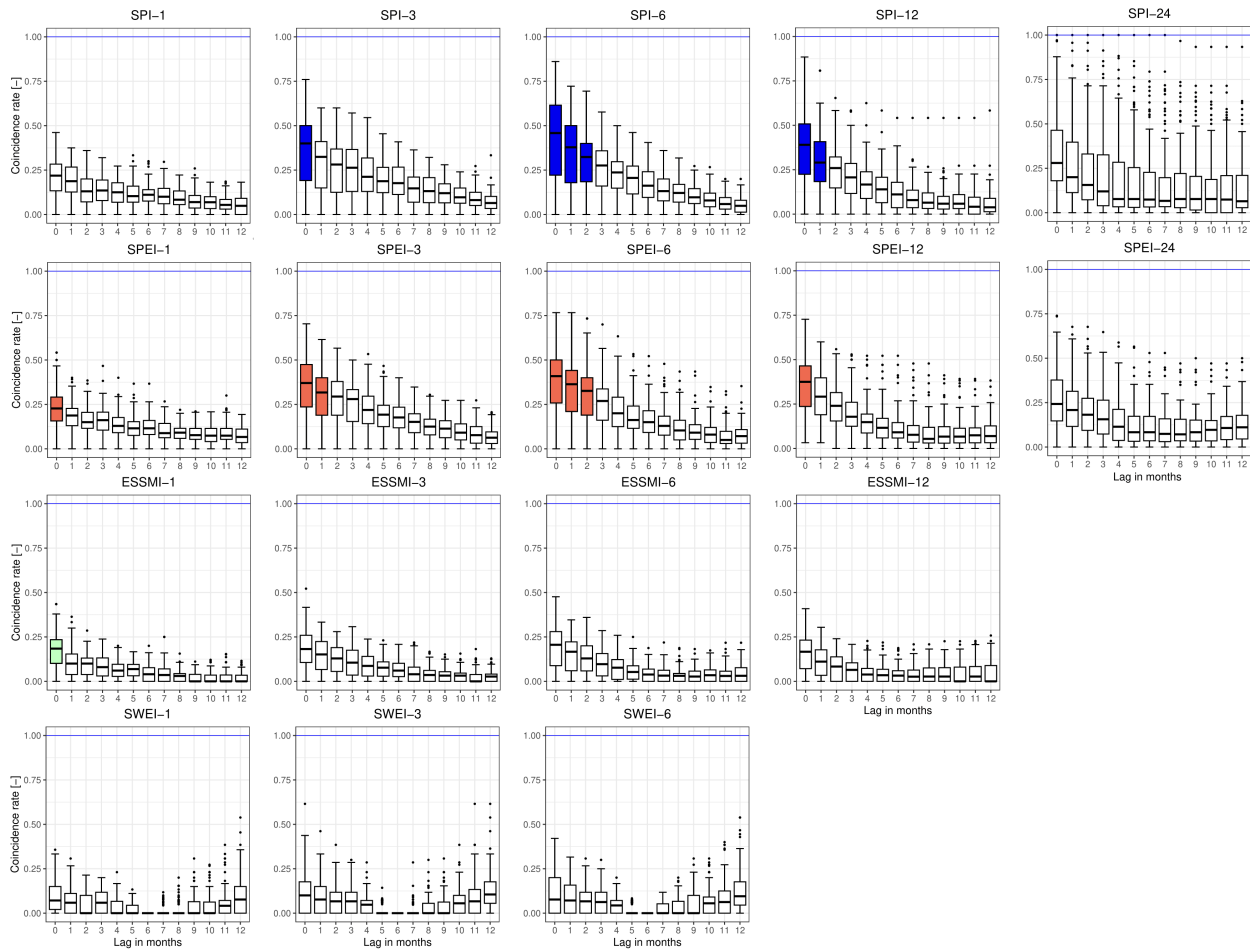

**Figure S7.** Event coincidence analysis results of the selected drought indices and the SSI-1 at different lag periods (ranging from 0 to 12 months) for a threshold of  $-1.5$  (severe droughts). The solid coloured boxplots indicate those lags where at least 75% of the catchments presented significant results at the 95% confidence interval, while the white boxplots indicate the opposite. The blue line indicates the optimal cross-correlation. The solid line within each box represents the median value, the edges of the boxes represent the first and third quartiles, and the whiskers extend to the most extreme data point which is no more than 1.5 times the interquartile range from the box.

## **4 All catchments — Spatial analysis for different temporal scales and lag times**





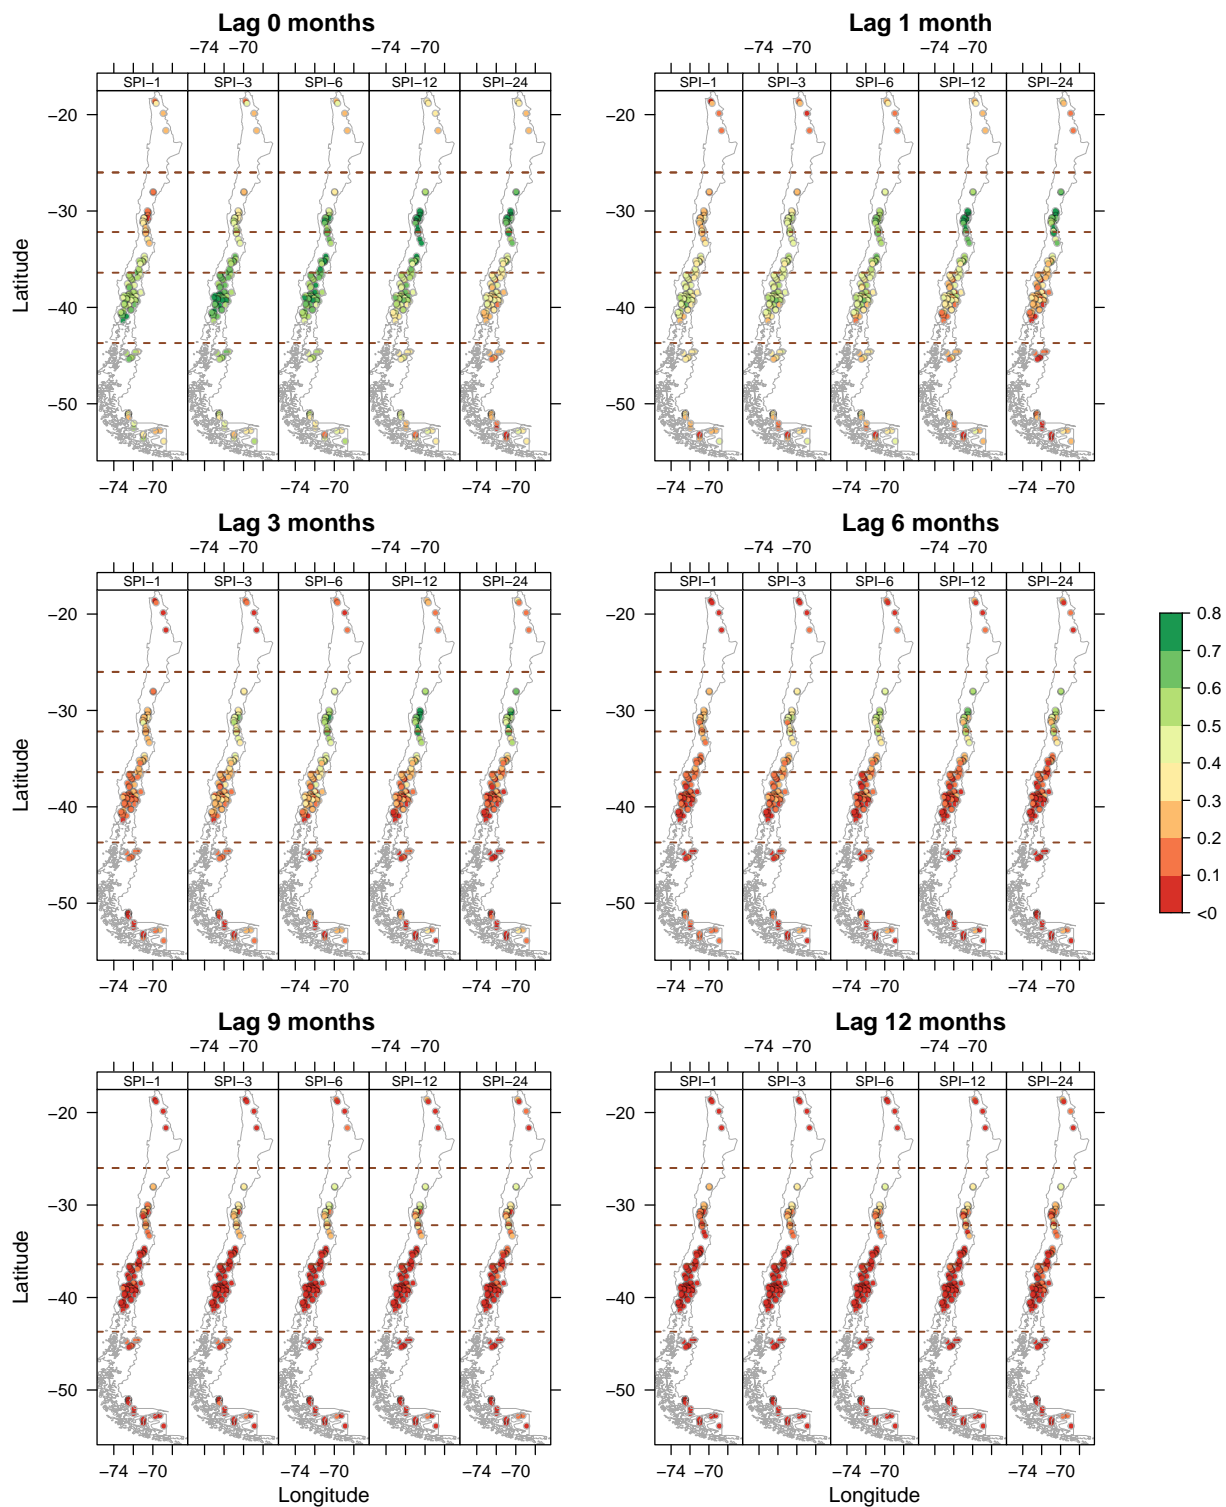

**Figure S8.** Spatial distribution of the cross-correlation results between the SPI at different scales and the SSI-1 over 100 near-natural catchments at different lags (0, 1, 3, 6, 9, and 12 months).

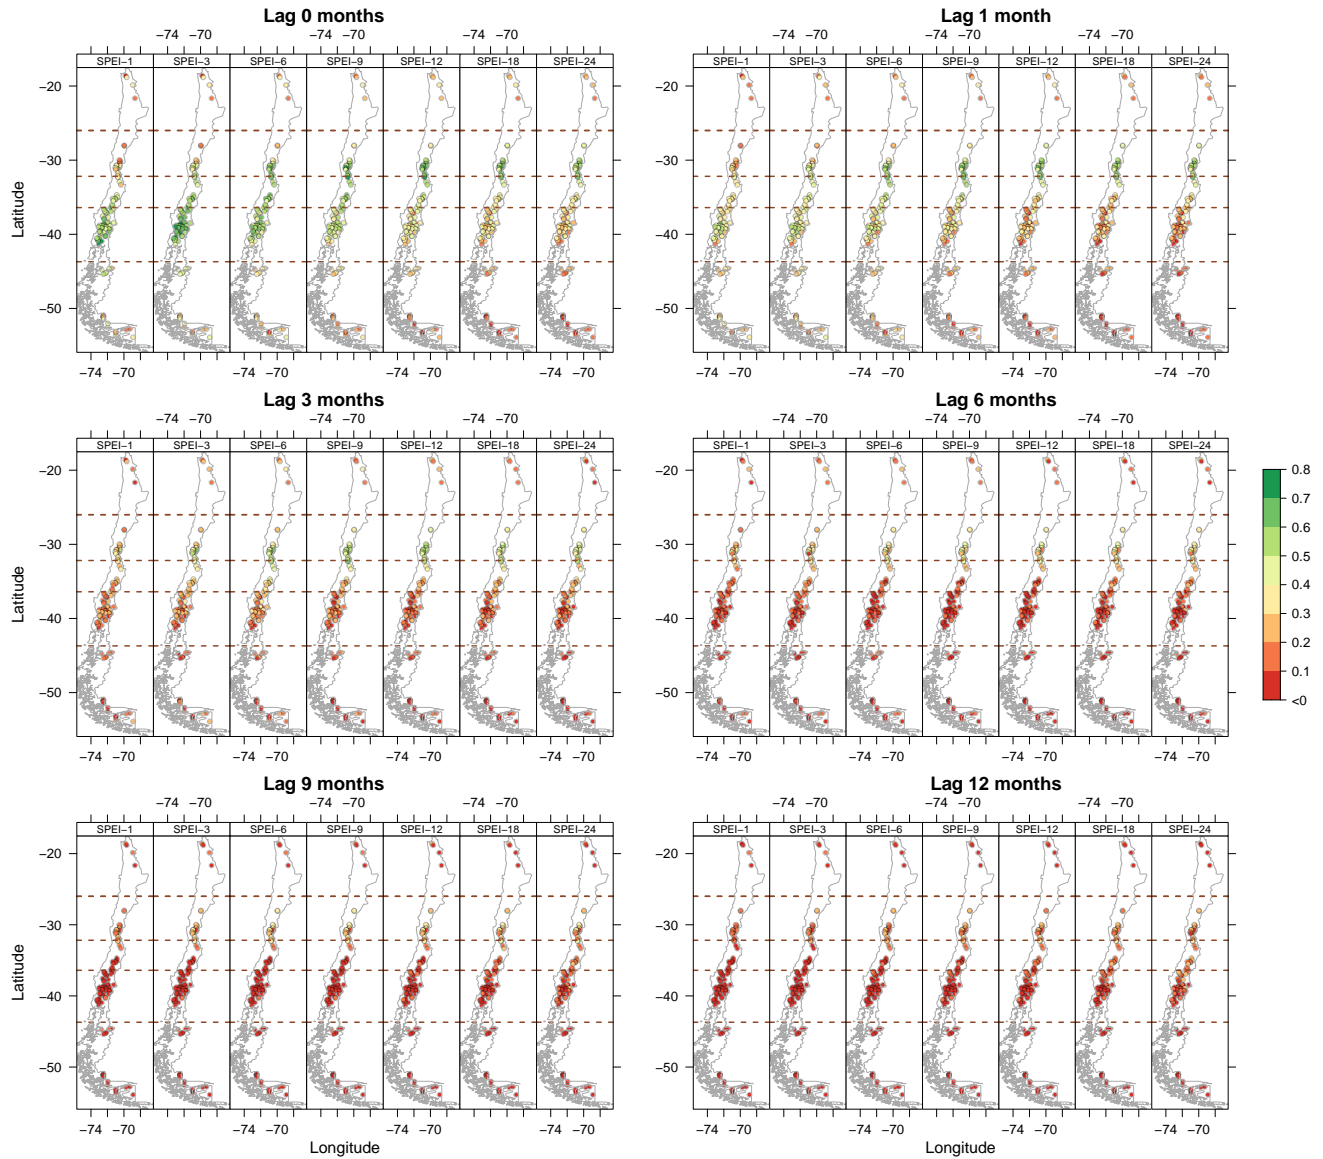

**Figure S9.** Spatial distribution of the cross-correlation results between the SPEI at different scales and the SSI-1 over 100 near-natural catchments at different lags (0, 1, 3, 6, 9, and 12 months).

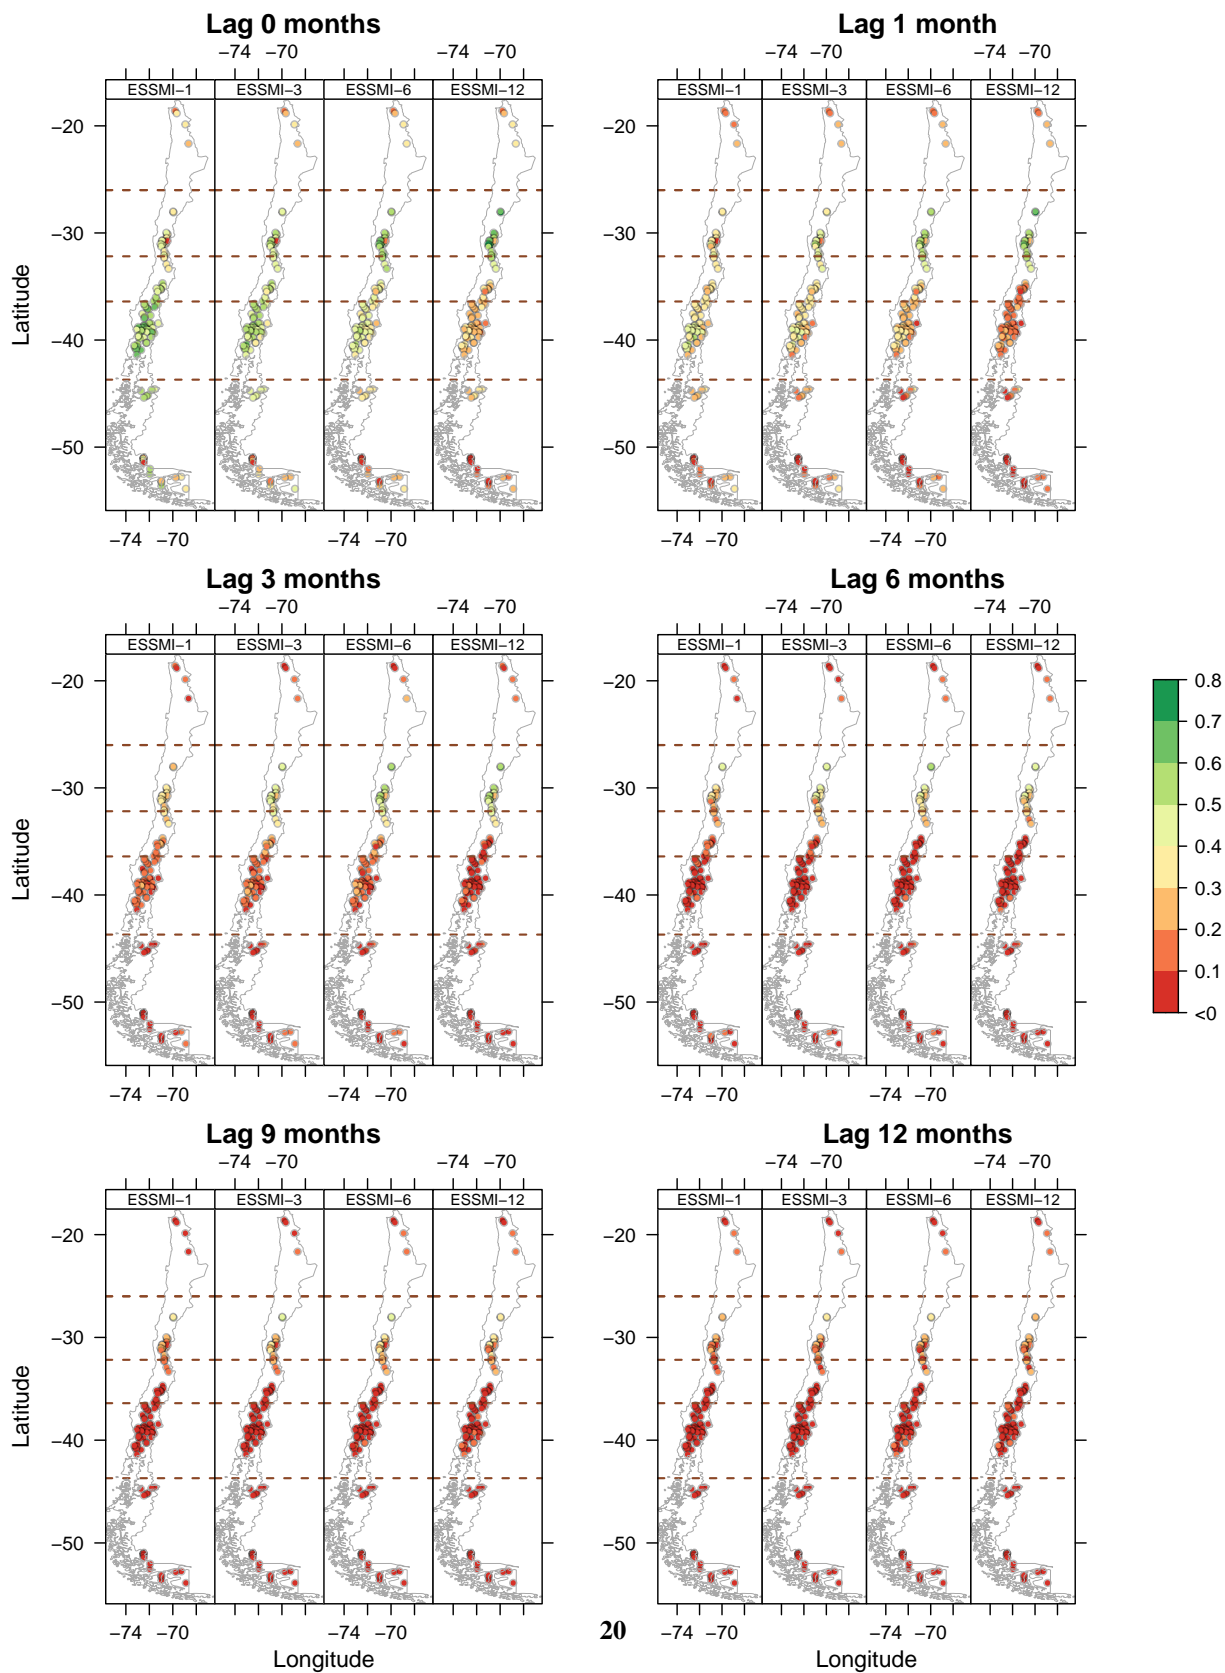

**Figure S10.** Spatial distribution of the cross-correlation results between the ESSMI at different scales and the SSI-1 over 100 near-natural

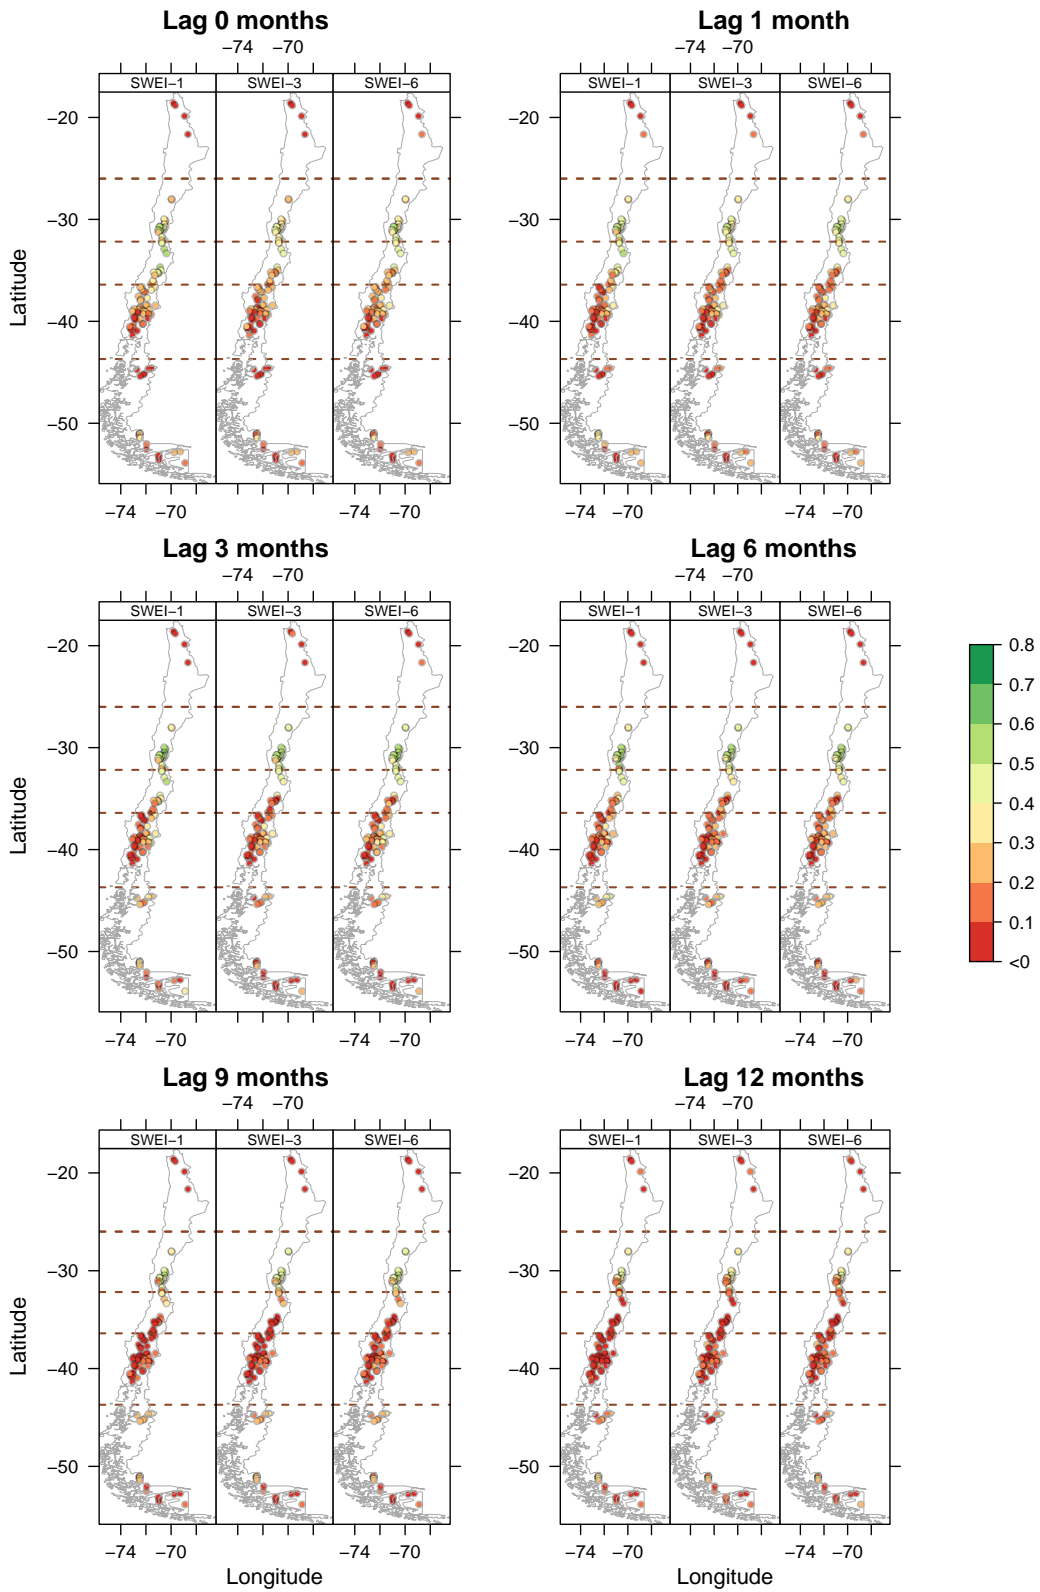

**Figure S11.** Spatial distribution of the cross-correlation results between the SWEI at different scales and the SSI-1 over 100 near-natural catchments at different lags (0, 1, 3, 6, 9, and 12 months).

## 4.2 Event coincidence analysis

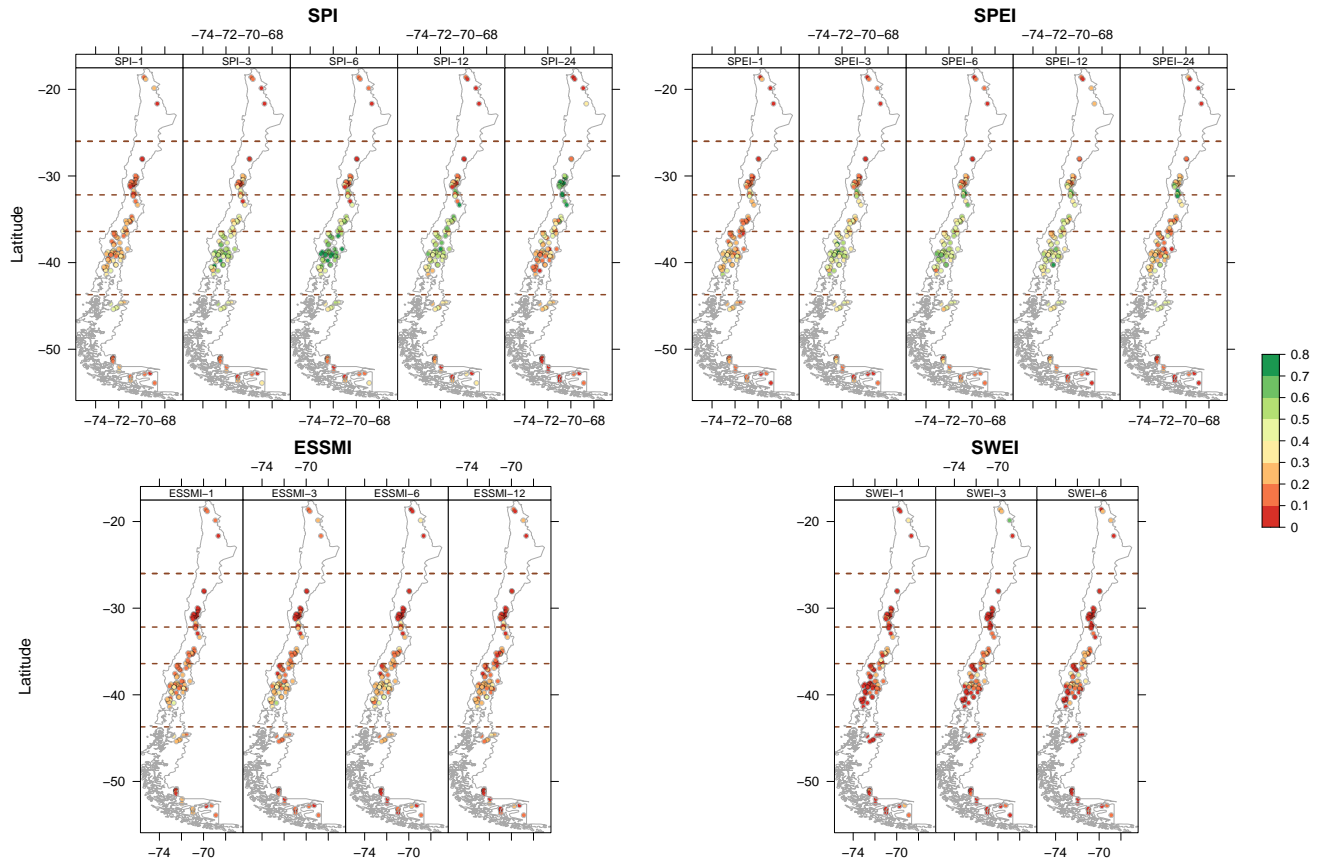

**Figure S12.** Spatial distribution of the event coincidence analysis results for severe droughts between the selected indices and the SSI-1 over 100 near-natural catchments and at a lag of zero months.

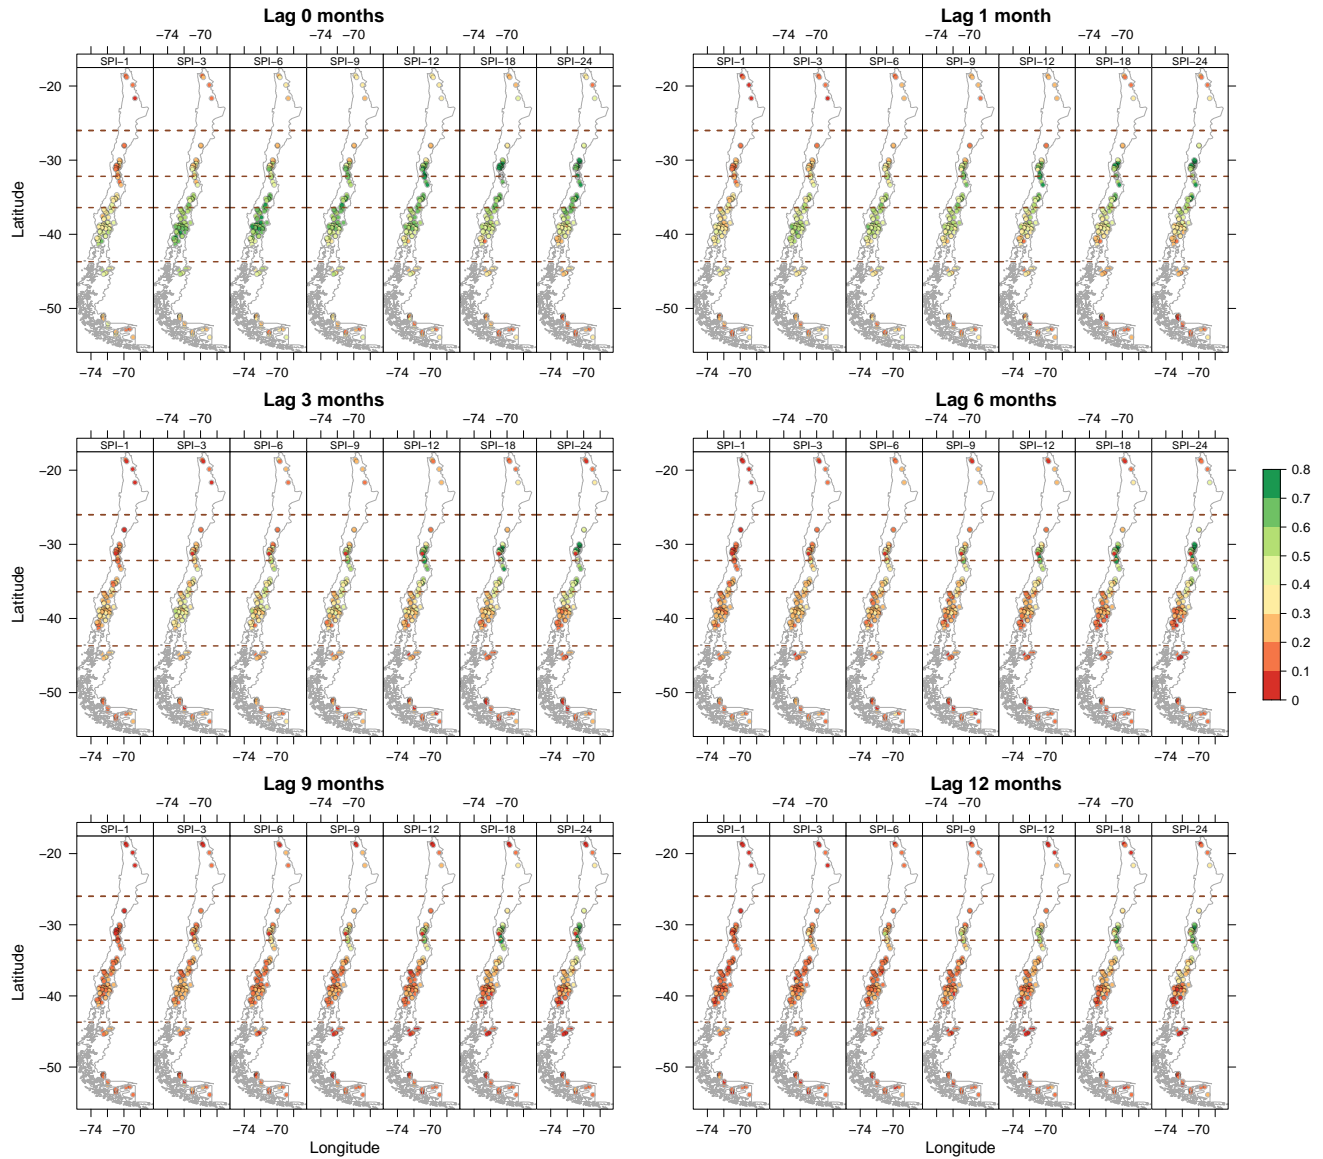

**Figure S13.** Spatial distribution of the event coincidence analysis results for moderate droughts between the SPI and the SSI-1 over 100 near-natural catchments and at different lags (0, 1, 3, 6, 9, and 12 months).

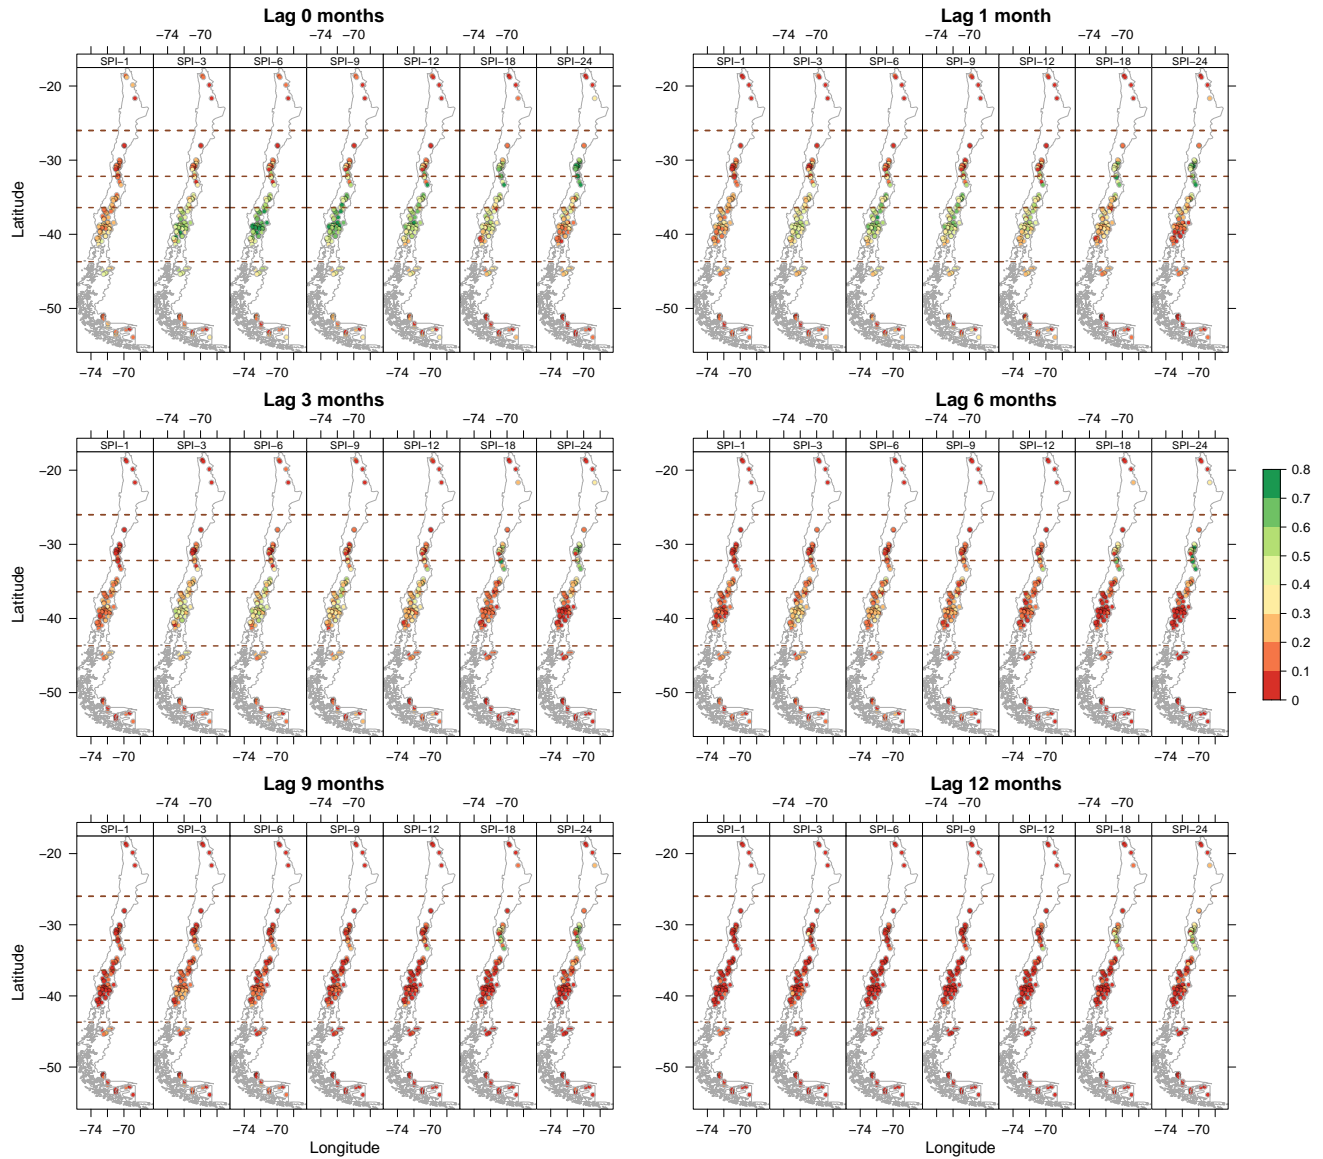

**Figure S14.** Spatial distribution of the event coincidence analysis results for severe droughts between the SPI and the SSI-1 over 100 near-natural catchments and at different lags (0, 1, 3, 6, 9, and 12 months).



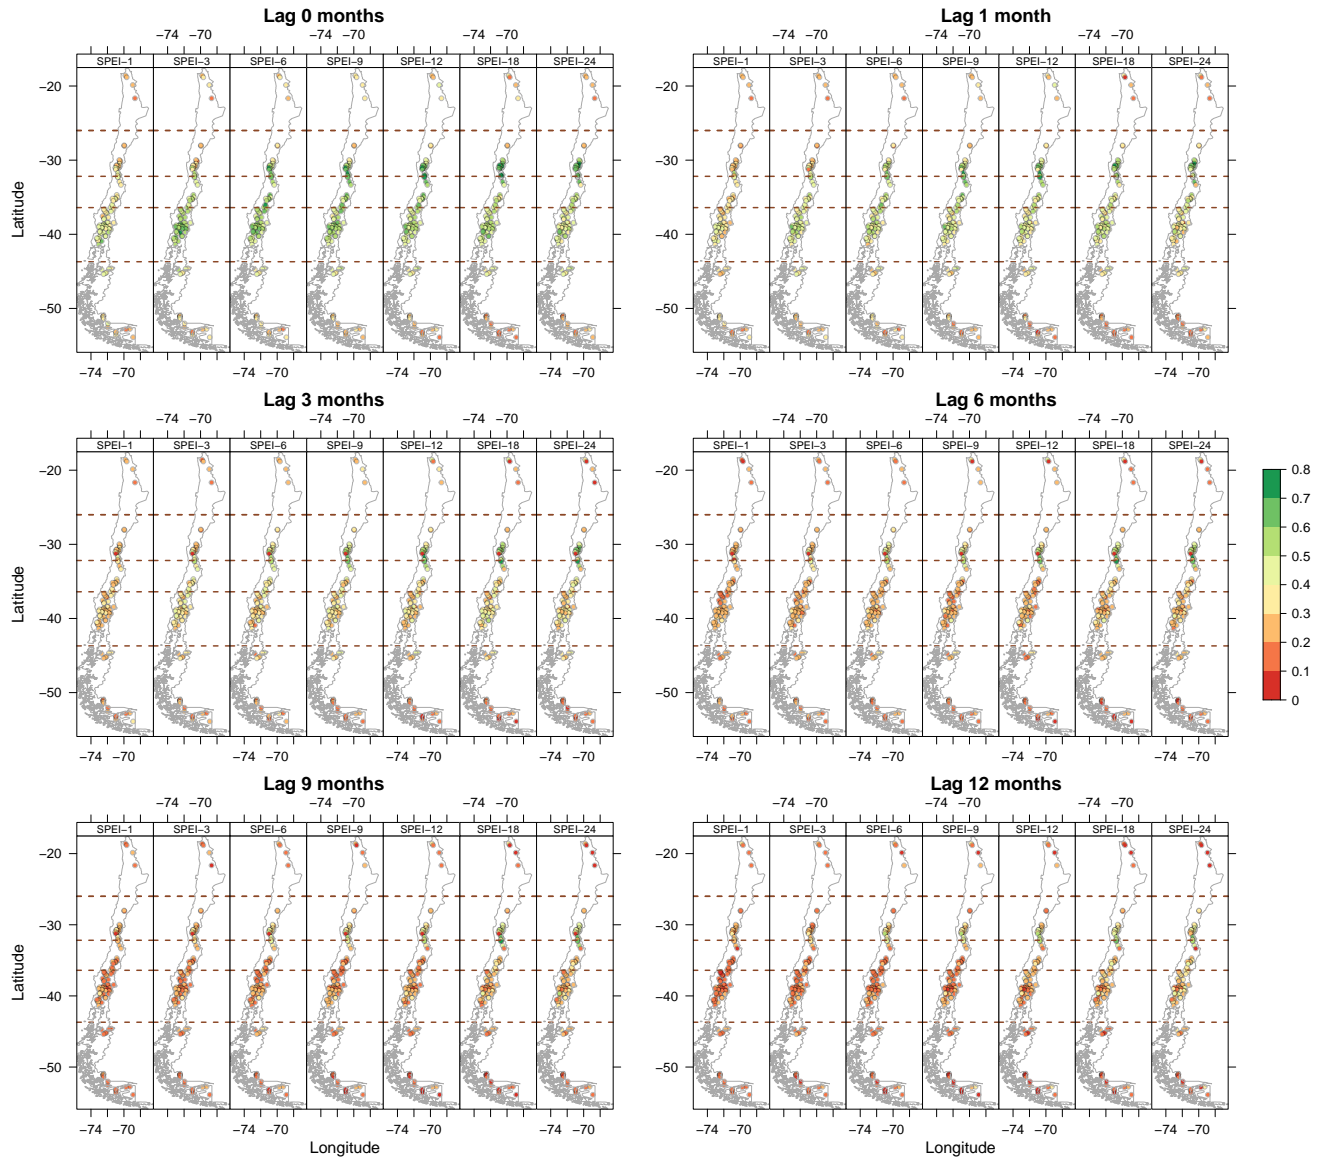

**Figure S15.** Spatial distribution of the event coincidence analysis results for moderate droughts between the SPEI and the SSI-1 over 100 near-natural catchments and at different lags (0, 1, 3, 6, 9, and 12 months).

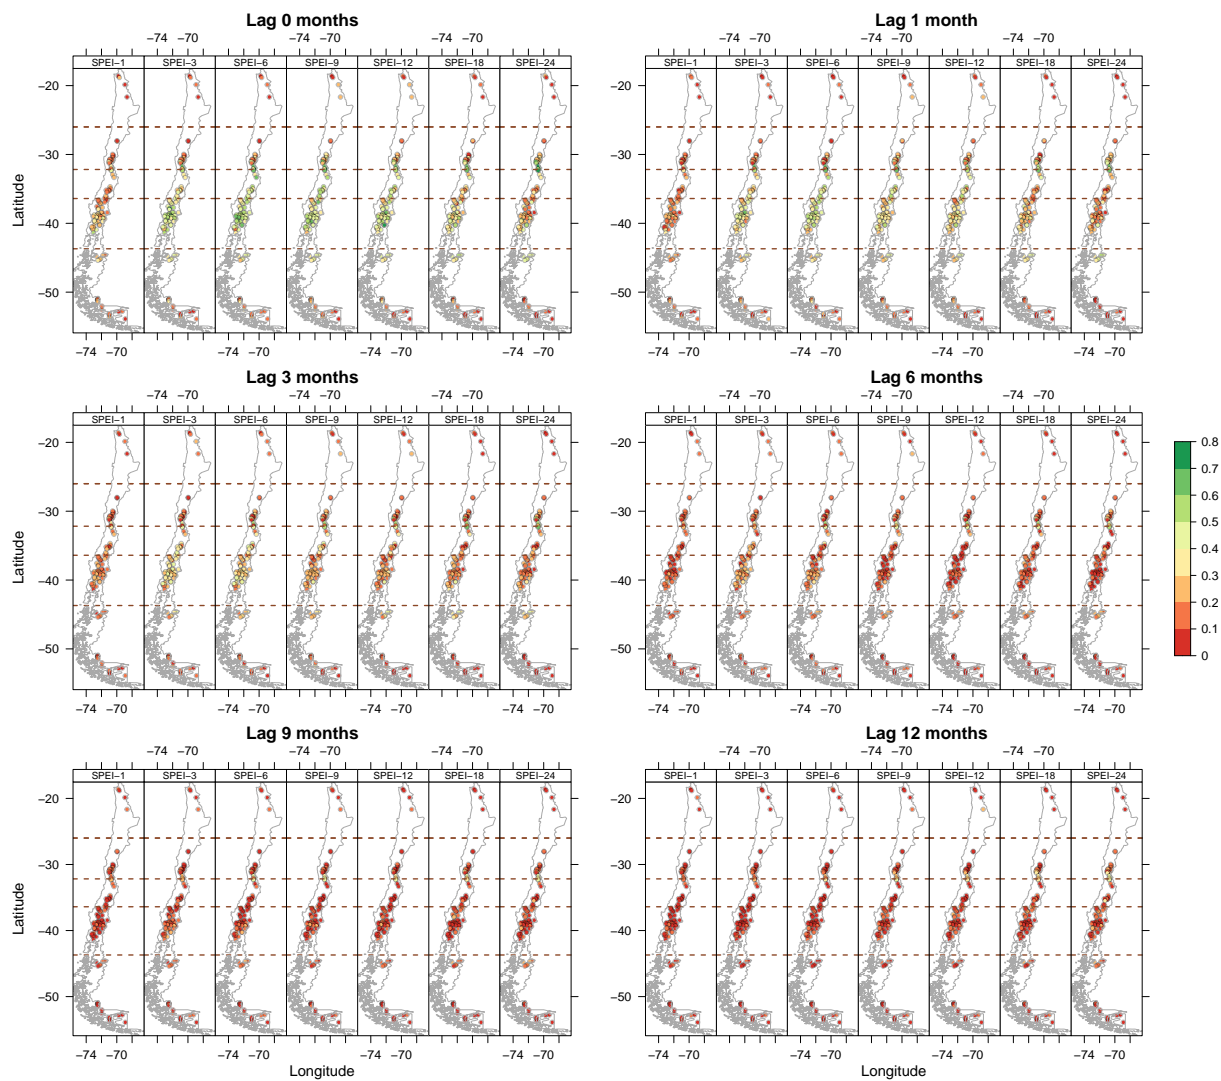

**Figure S16.** Spatial distribution of the event coincidence analysis results for severe droughts between the SPEI and the SSI-1 over 100 near-natural catchments and at different lags (0, 1, 3, 6, 9, and 12 months).

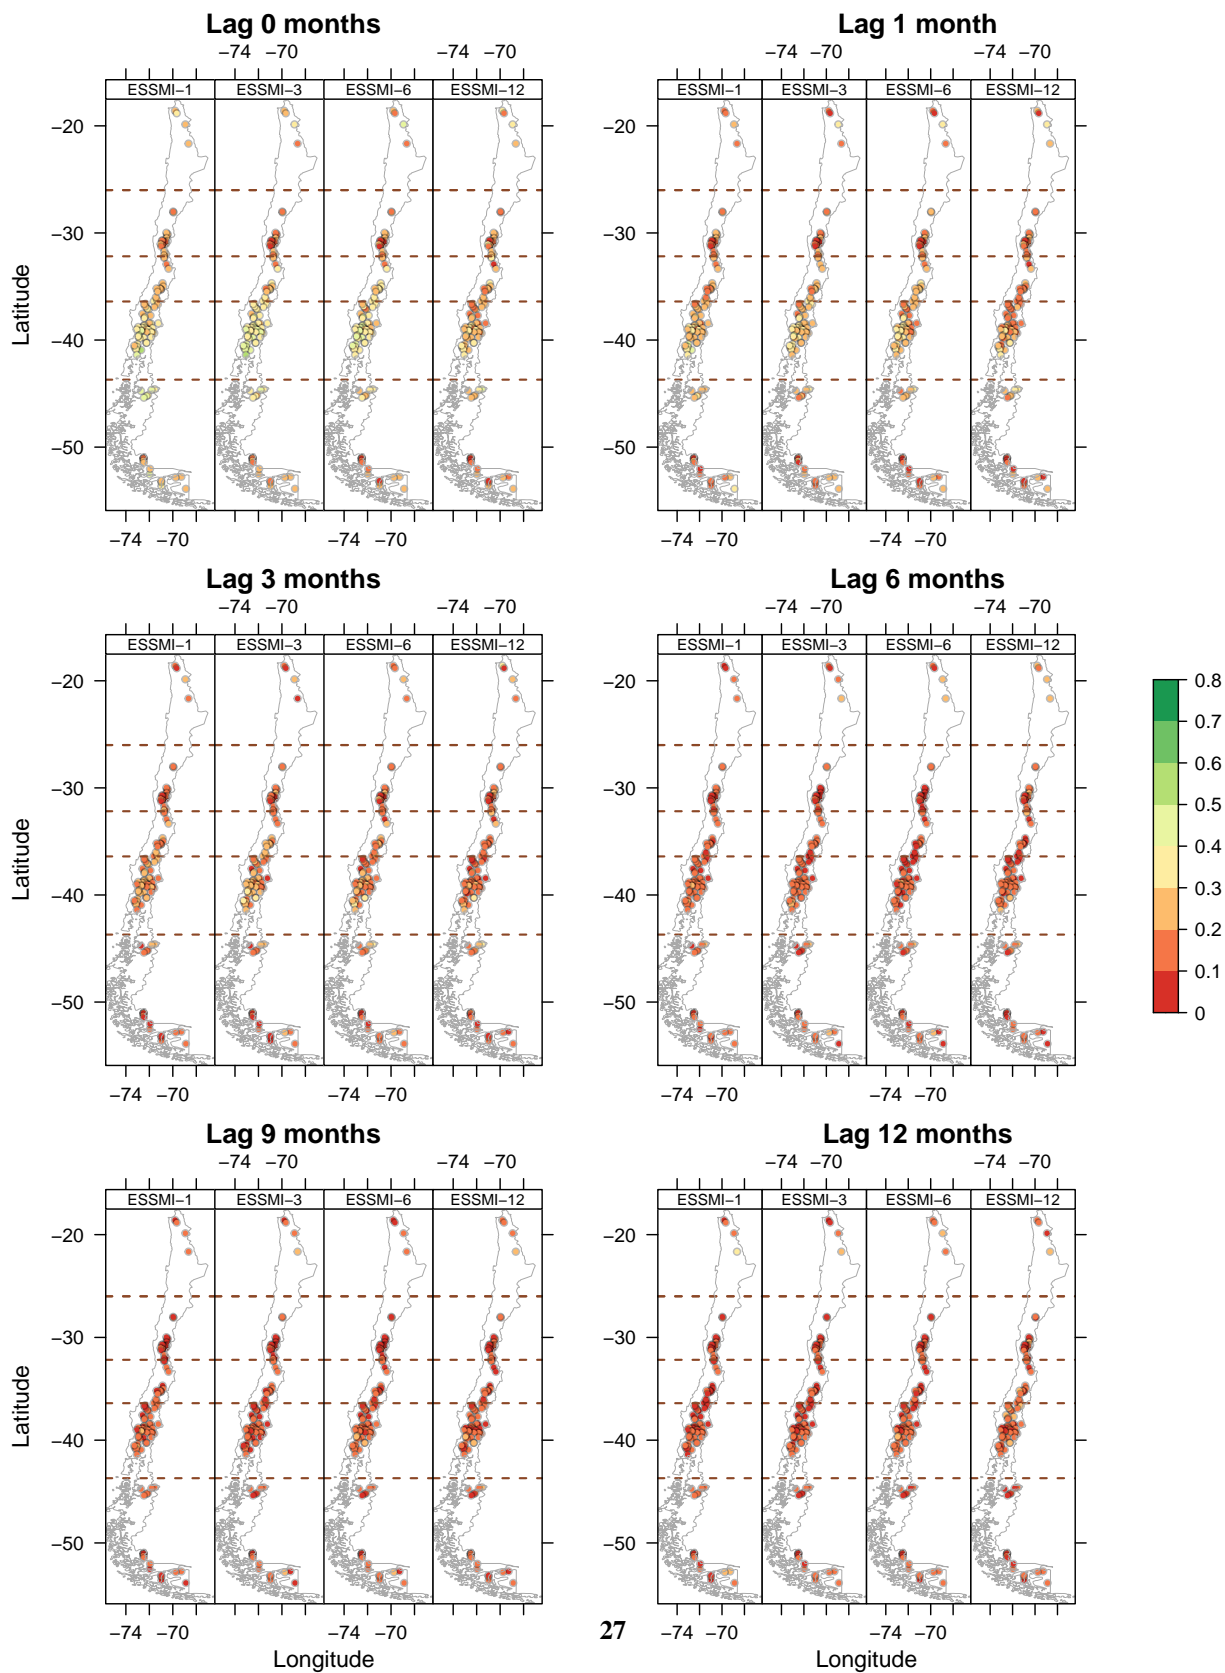

**Figure S17.** Spatial distribution of the event coincidence analysis results for severe droughts between the ESSMI and the SSI-1 over 100

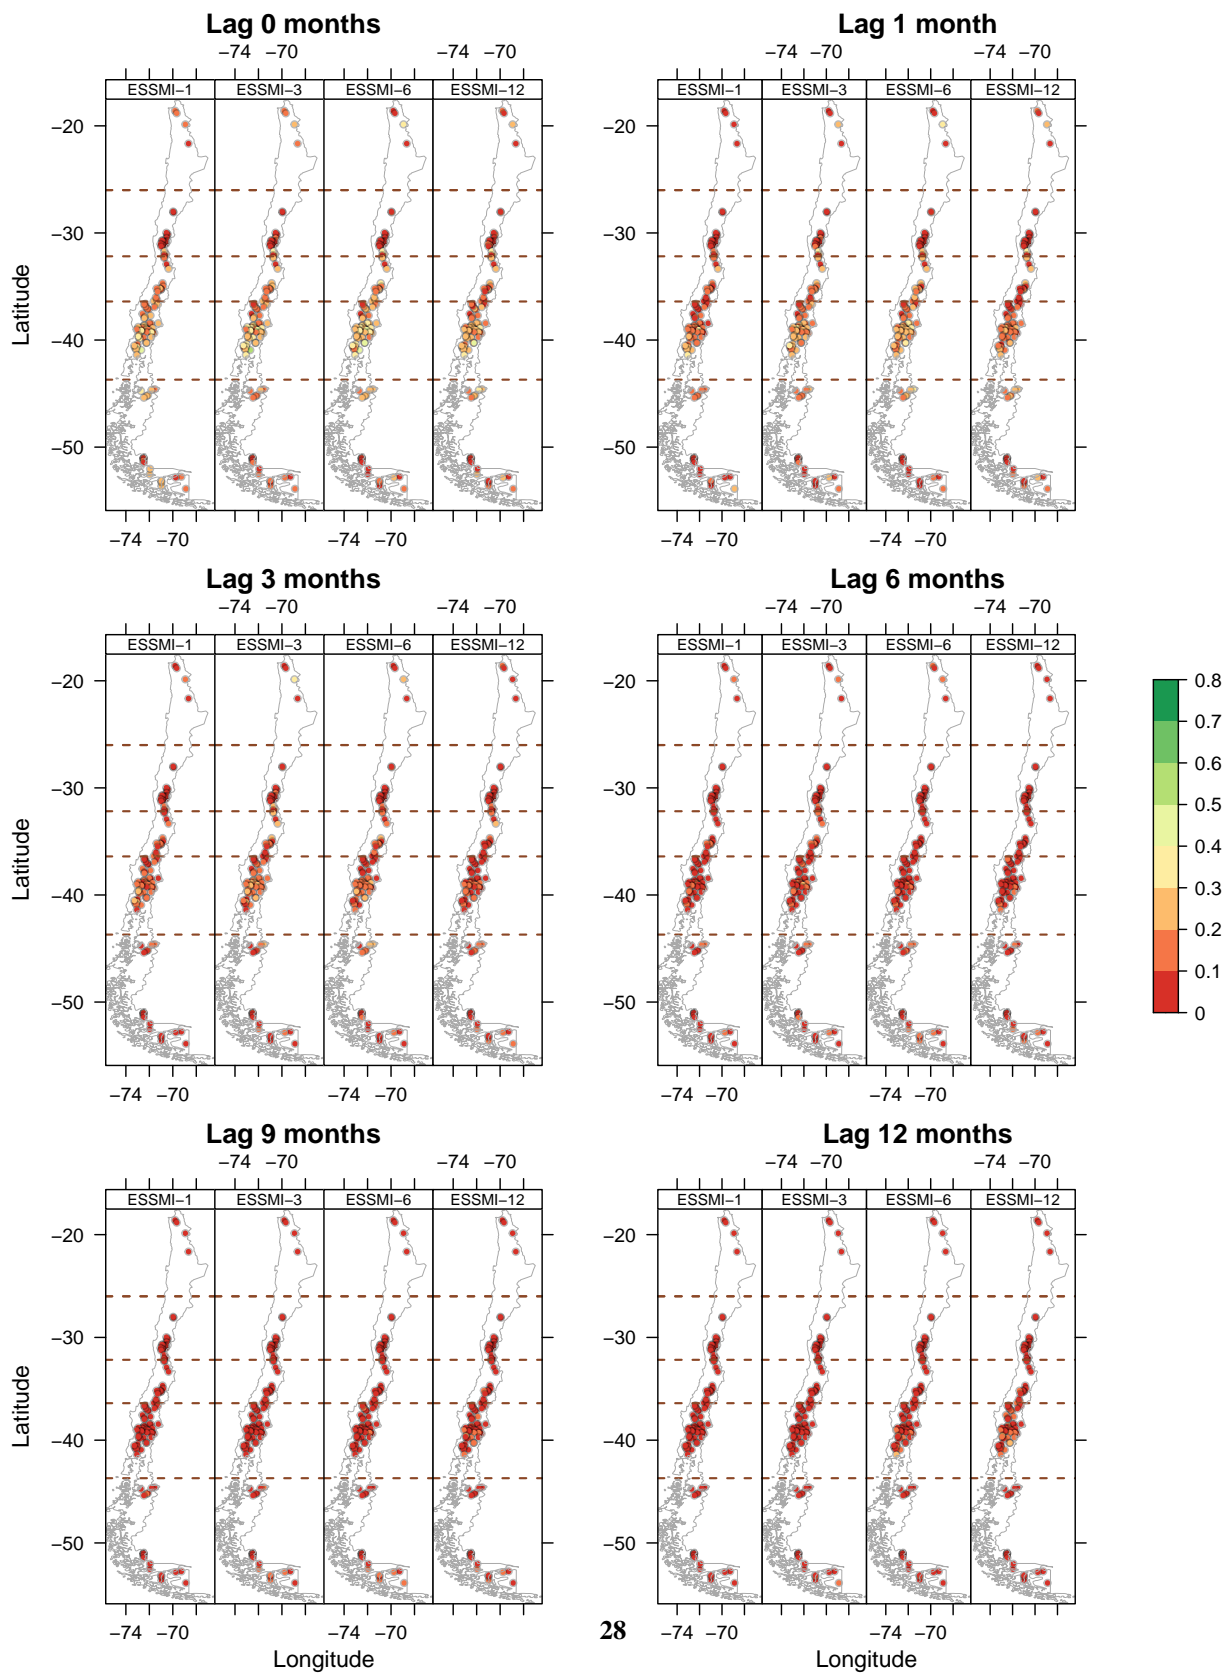

**Figure S18.** Spatial distribution of the event coincidence analysis results for severe droughts between the ESSMI and the SSI-1 over 100

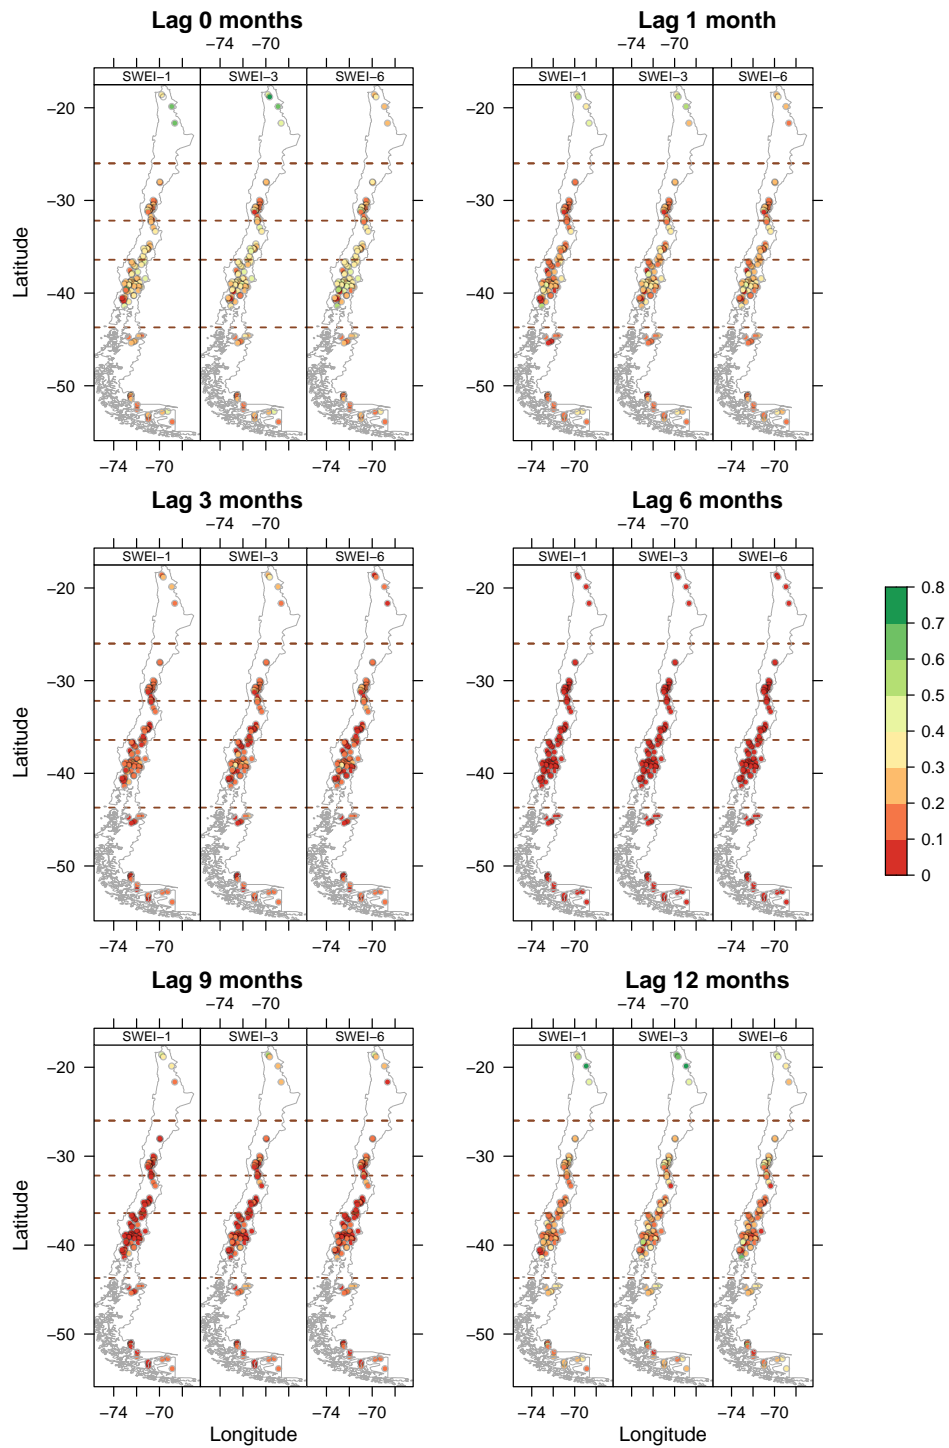

**Figure S19.** Spatial distribution of the event coincidence analysis results for moderate droughts between the SWEI and the SSI-1 over 100 near-natural catchments and at different lags (0, 1, 3, 6, 9, and 12 months).

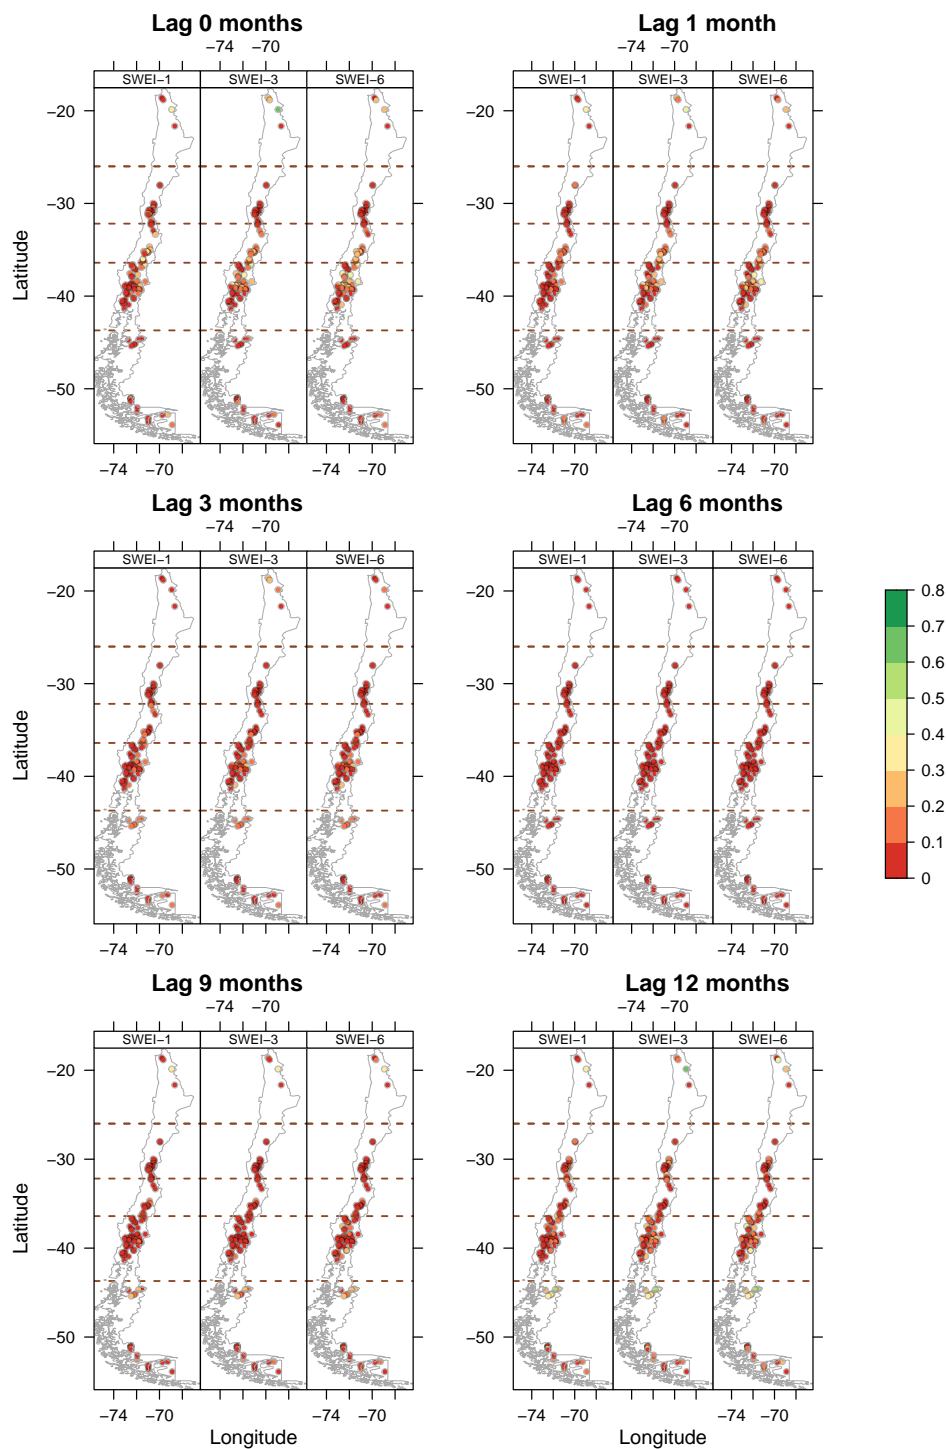

**Figure S20.** Spatial distribution of the event coincidence analysis results for severe droughts between the SWEI and the SSI-1 over 100 near-natural catchments and at different lags (0, 1, 3, 6, 9, and 12 months).

## **5. Cross-Correlation analysis – Hydrological Regimes**

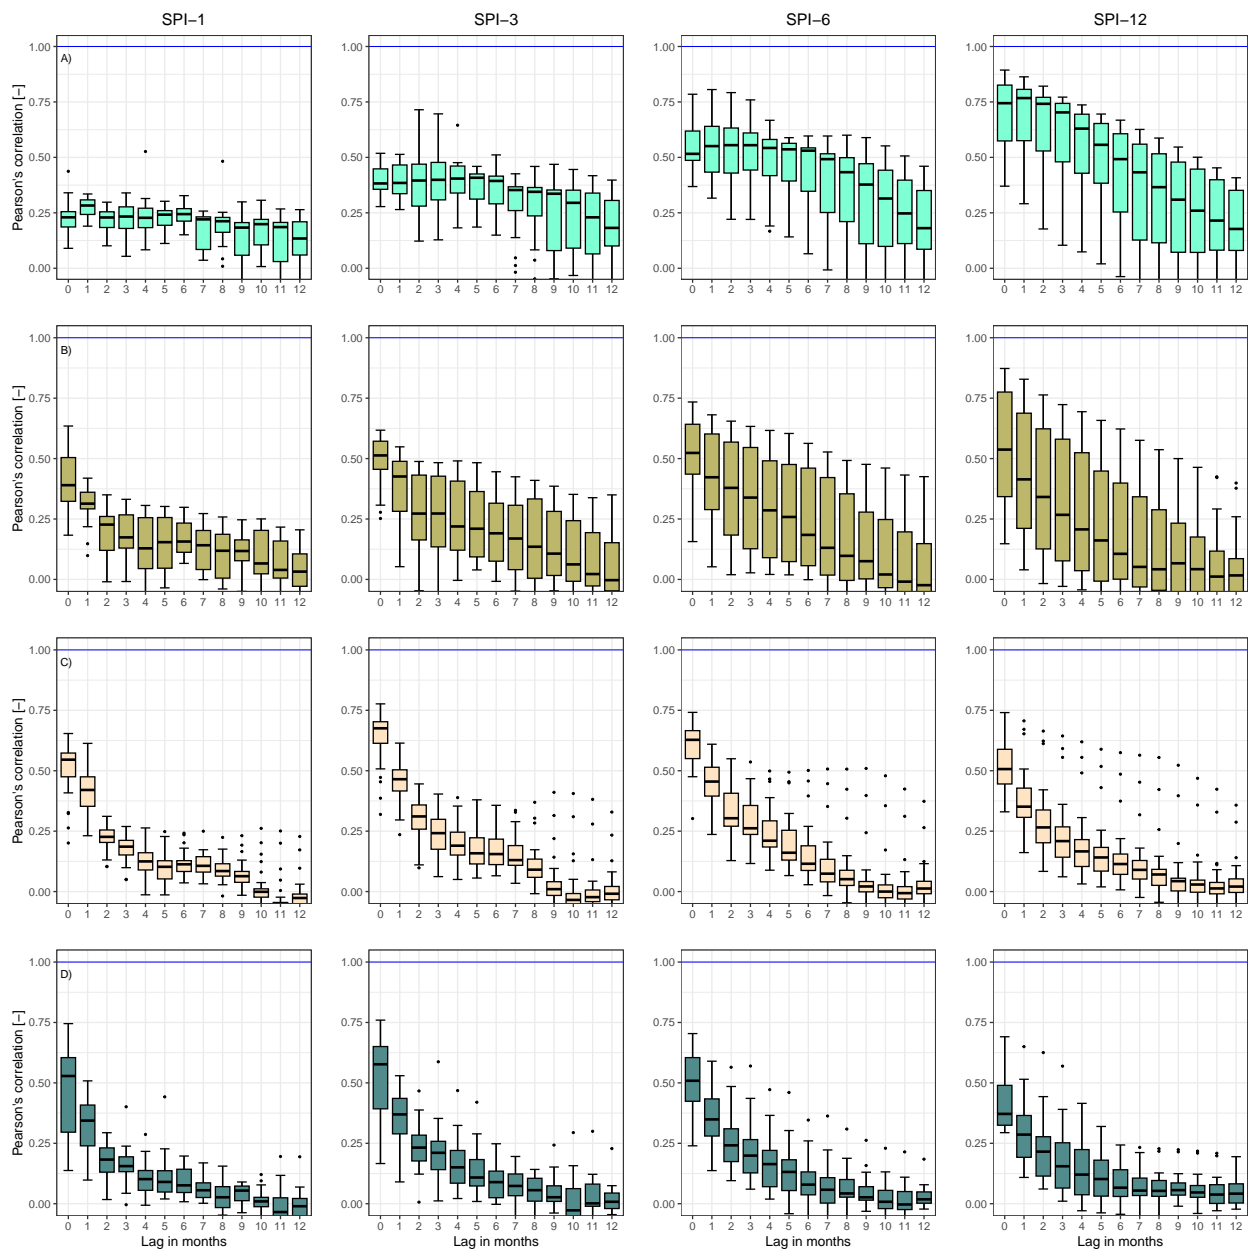

**Figure S21.** cross-correlation results of the SPI and the SSI-1 at different lag periods (ranging from 0 to 12 months) for *i*) snow-dominated catchments (a); *ii*) nivo-pluvial (b); *iii*) pluvio-nival (c); and *iv*) rain-dominated (d) catchments. The blue line indicates the optimal cross-correlation. The solid line within each box represents the median value, the edges of the boxes represent the first and third quartiles, and the whiskers extend to the most extreme data point which is no more than 1.5 times the interquartile range from the box.



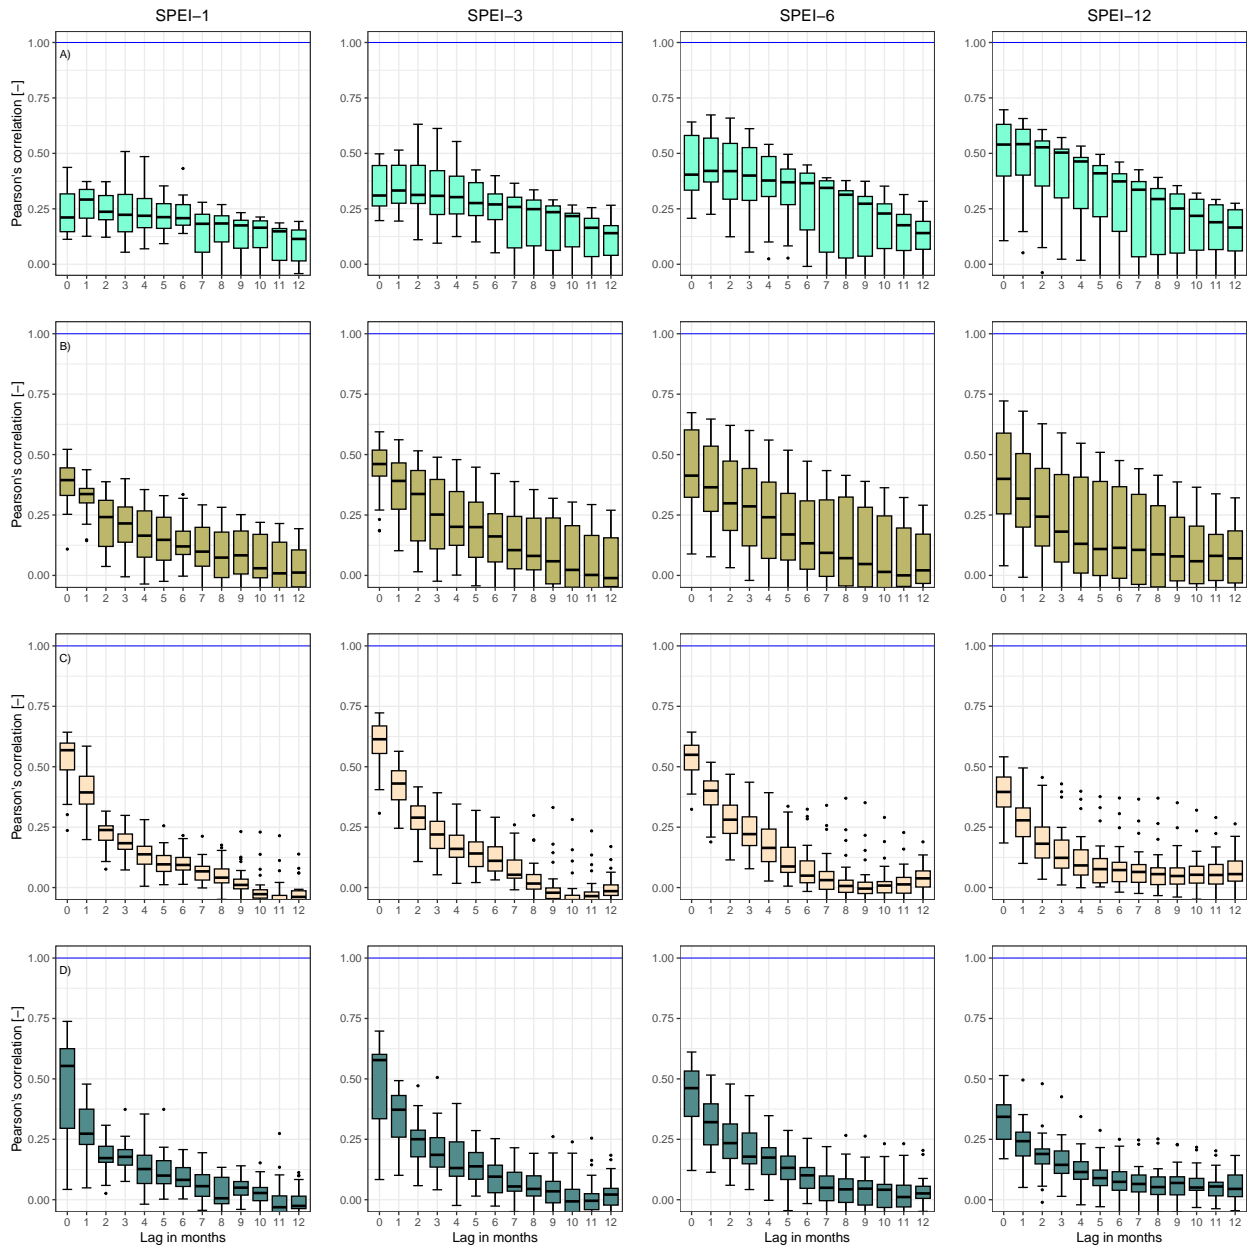

**Figure S22.** cross-correlation results of the SPEI and the SSI-1 at different lag periods (ranging from 0 to 12 months) for *i*) snow-dominated catchments (a); *ii*) nivo-pluvial (b); *iii*) pluvio-nival (c); and *iv*) rain-dominated (d) catchments. The blue line indicates the optimal cross-correlation. The solid line within each box represents the median value, the edges of the boxes represent the first and third quartiles, and the whiskers extend to the most extreme data point which is no more than 1.5 times the interquartile range from the box.

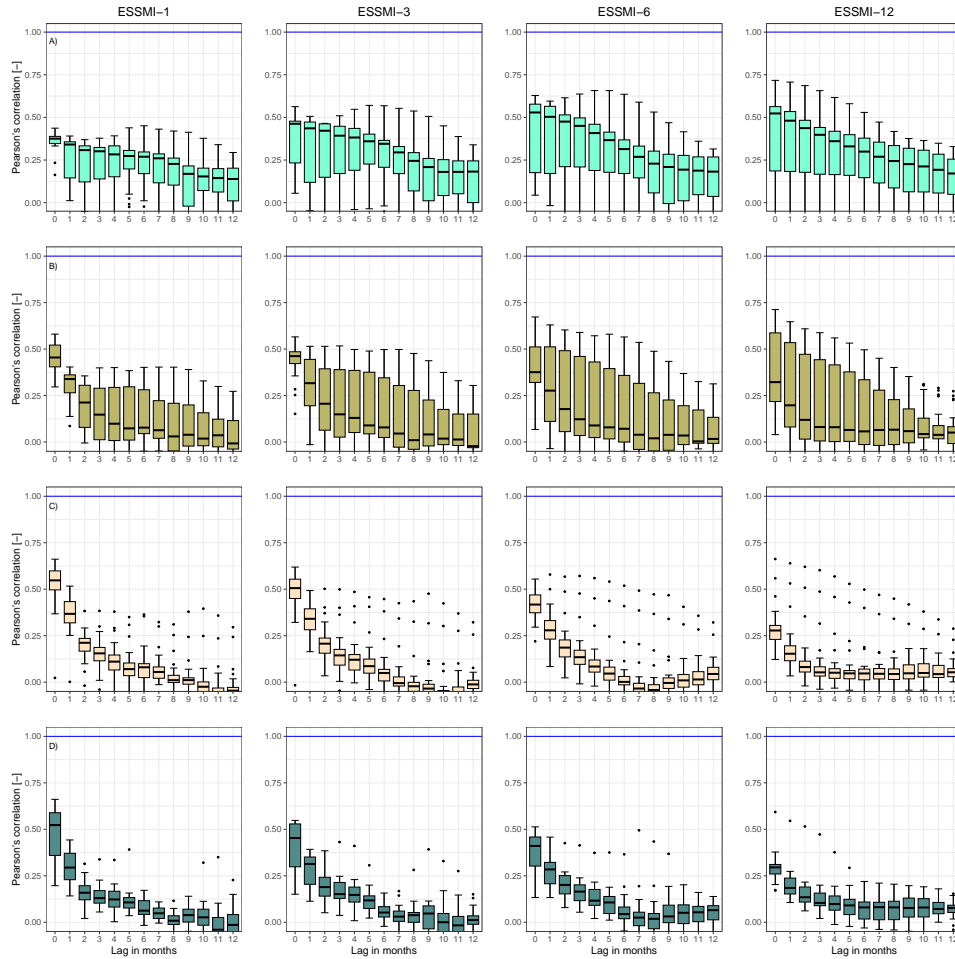

**Figure S23.** cross-correlation results of the ESSMI and the SSI-1 at different lag periods (ranging from 0 to 12 months) for *i)* snow-dominated catchments (a); *ii)* nivo-pluvial (b); *iii)* pluvio-nival (c); and *iv)* rain-dominated (d) catchments. The blue line indicates the optimal cross-correlation. The solid line within each box represents the median value, the edges of the boxes represent the first and third quartiles, and the whiskers extend to the most extreme data point which is no more than 1.5 times the interquartile range from the box.

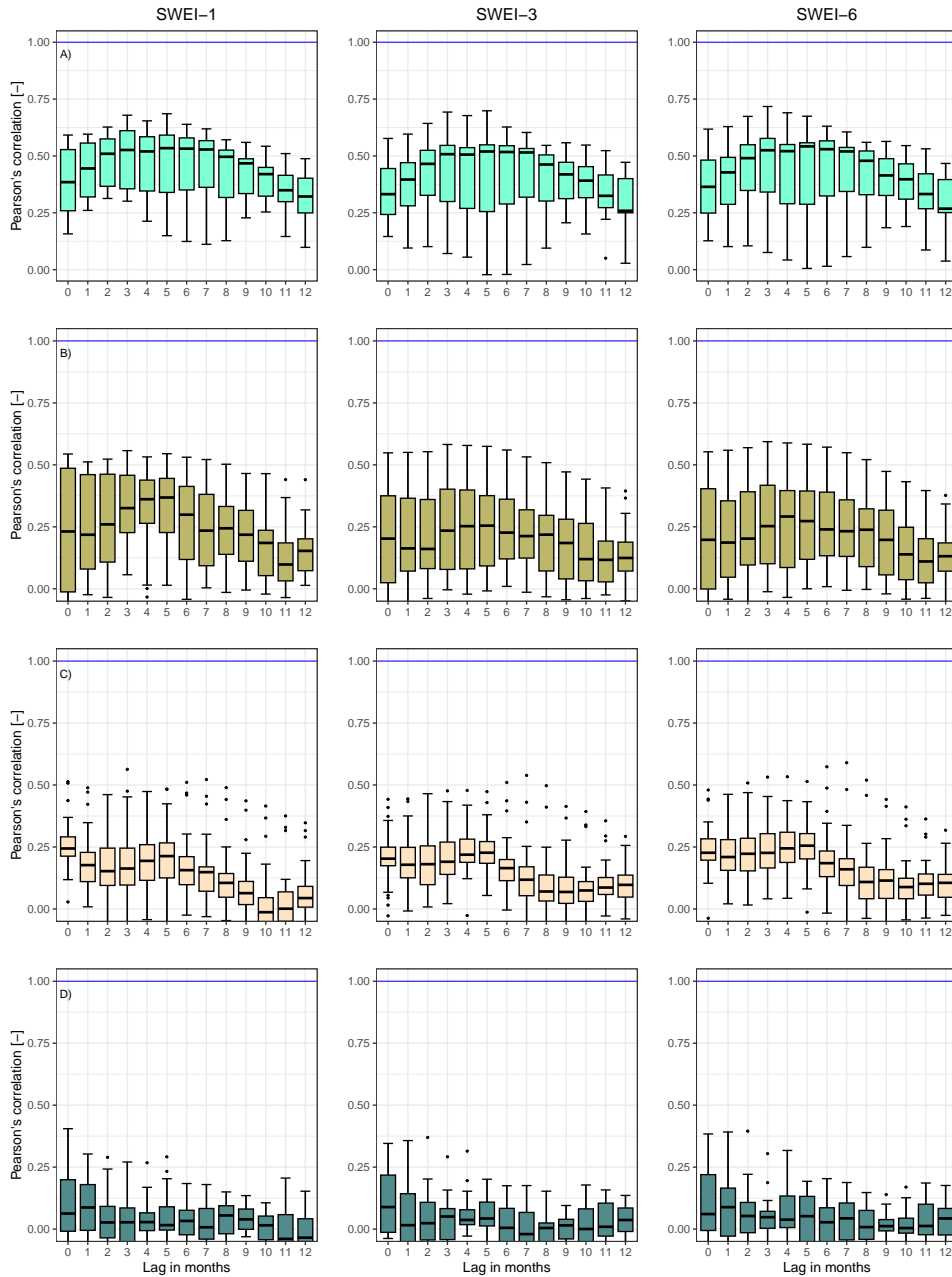

**Figure S24.** cross-correlation results of the SWEI and the SSI-1 at different lag periods (ranging from 0 to 12 months) for *i)* snow-dominated catchments (a); *ii)* nivo-pluvial (b); *iii)* pluvio-nival (c); and *iv)* rain-dominated (d) catchments. The blue line indicates the optimal cross-correlation. The solid line within each box represents the median value, the edges of the boxes represent the first and third quartiles, and the whiskers extend to the most extreme data point which is no more than 1.5 times the interquartile range from the box.

## **6. Event coincidence analysis – Hydrological Regimes**

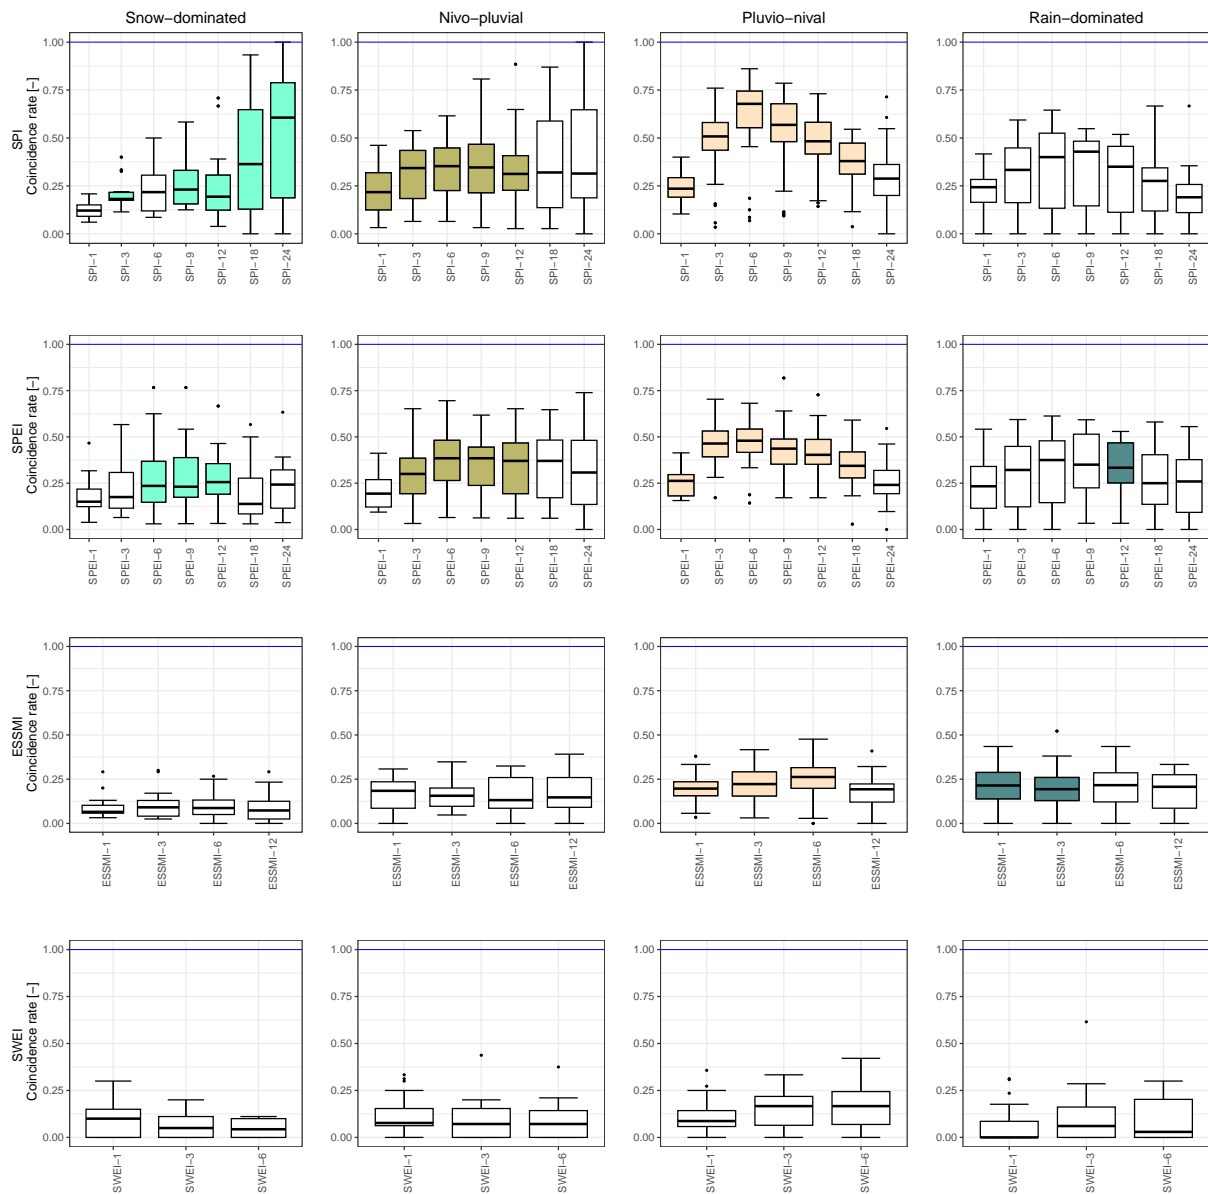

**Figure S25.** Event coincidence analysis results of the selected drought indices and the SSI-1 for severe droughts at a lag of zero months for *i*) nival; *ii*) nivo-pluvial; *iii*) pluvio-nival; and *iv*) pluvial catchments. The solid boxplots indicate those lags where at least 75% of the catchments presented significant results at the 95% confidence interval, while the white boxplots indicate the opposite. The blue line indicates the optimal cross-correlation. The solid line within each box represents the median value, the edges of the boxes represent the first and third quartiles, and the whiskers extend to the most extreme data point which is no more than 1.5 times the interquartile range from the box.

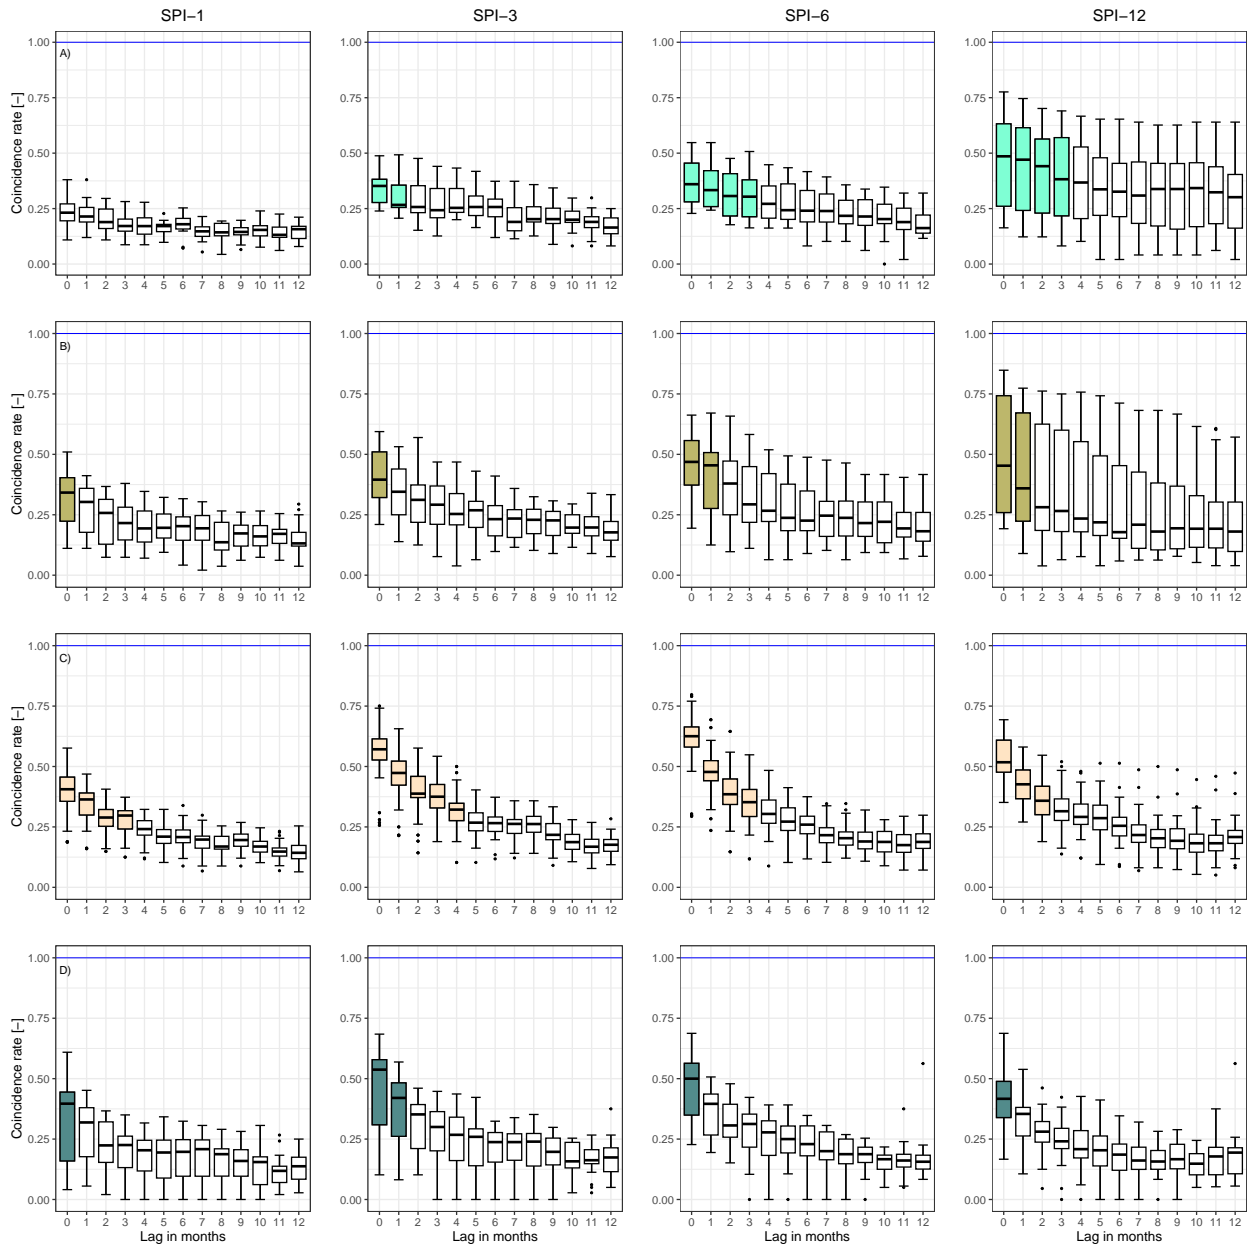

**Figure S26.** Event coincidence analysis results of the SPI and the SSI-1 for moderate droughts at different lag periods (ranging from 0 to 12 months) for *i*) snow-dominated (a); *ii*) nivo-pluvial (b); *iii*) pluvio-nival (c); and *iv*) rain-dominated (d) catchments. The solid coloured boxplots indicate those lags where at least 75% of the catchments presented significant results at the 95% confidence interval, while the white boxplots indicate the opposite. The blue line indicates the optimal cross-correlation. The solid line within each box represents the median value, the edges of the boxes represent the first and third quartiles, and the whiskers extend to the most extreme data point which is no more than 1.5 times the interquartile range from the box.

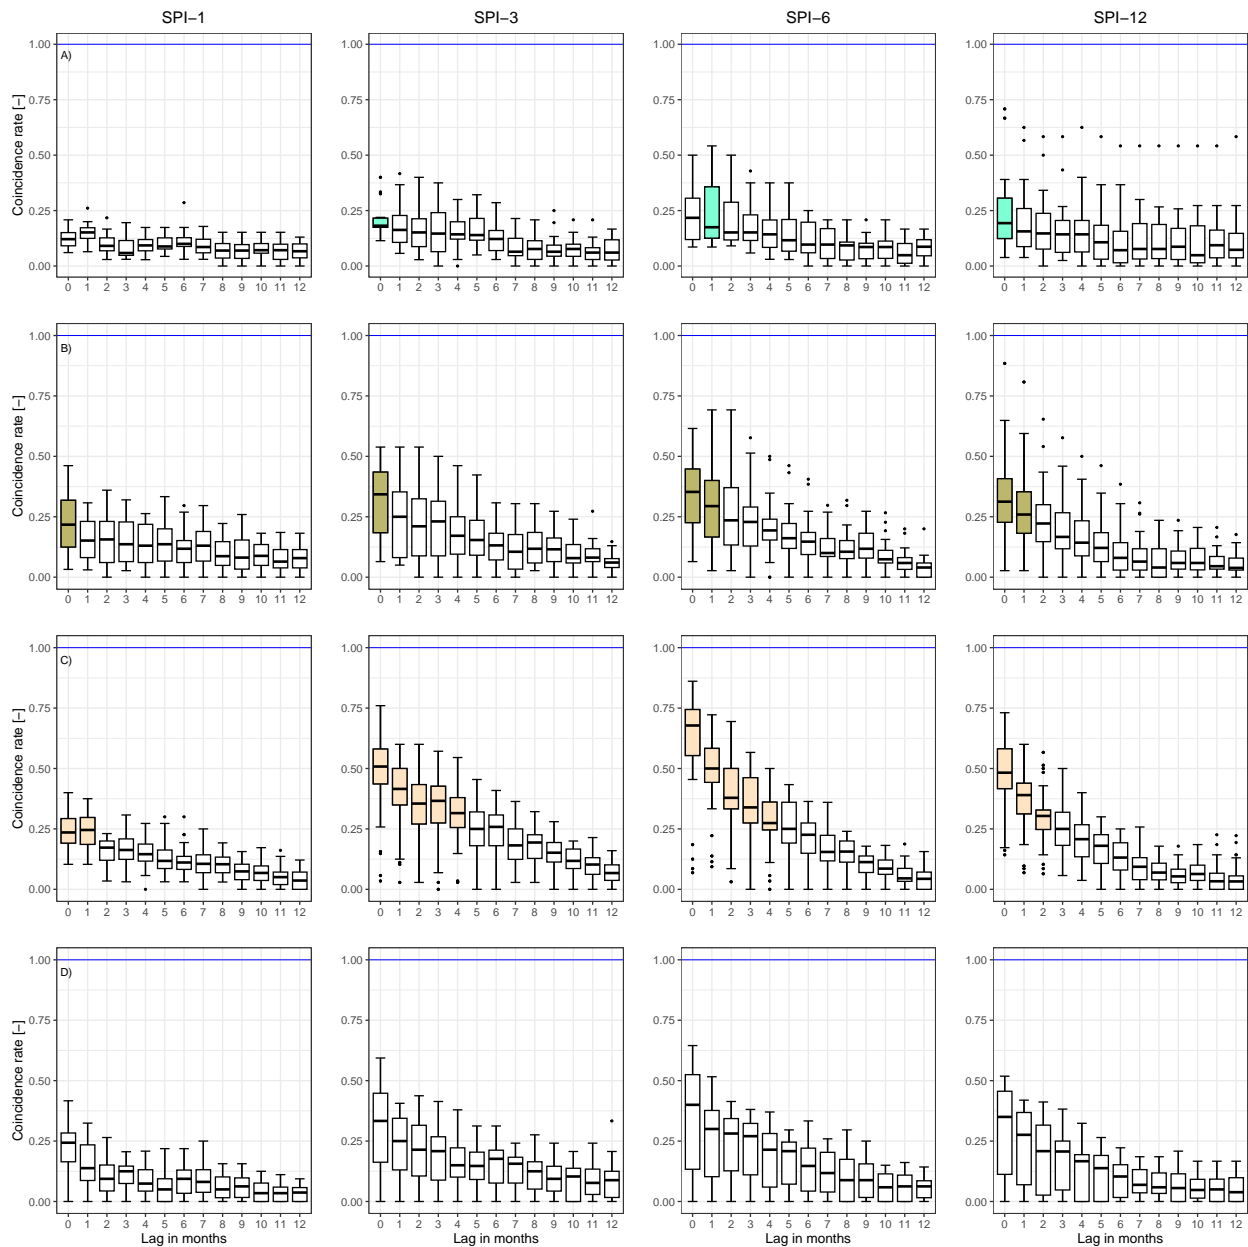

**Figure S27.** Event coincidence analysis results of the SPI and the SSI-1 for severe droughts at different lag periods (ranging from 0 to 12 months) for *i*) snow-dominated (a); *ii*) nivo-pluvial (b); *iii*) pluvio-nival (c); and *iv*) rain-dominated (d) catchments. The solid coloured boxplots indicate those lags where at least 75% of the catchments presented significant results at the 95% confidence interval, while the white boxplots indicate the opposite. The blue line indicates the optimal cross-correlation. The solid line within each box represents the median value, the edges of the boxes represent the first and third quartiles, and the whiskers extend to the most extreme data point which is no more than 1.5 times the interquartile range from the box.

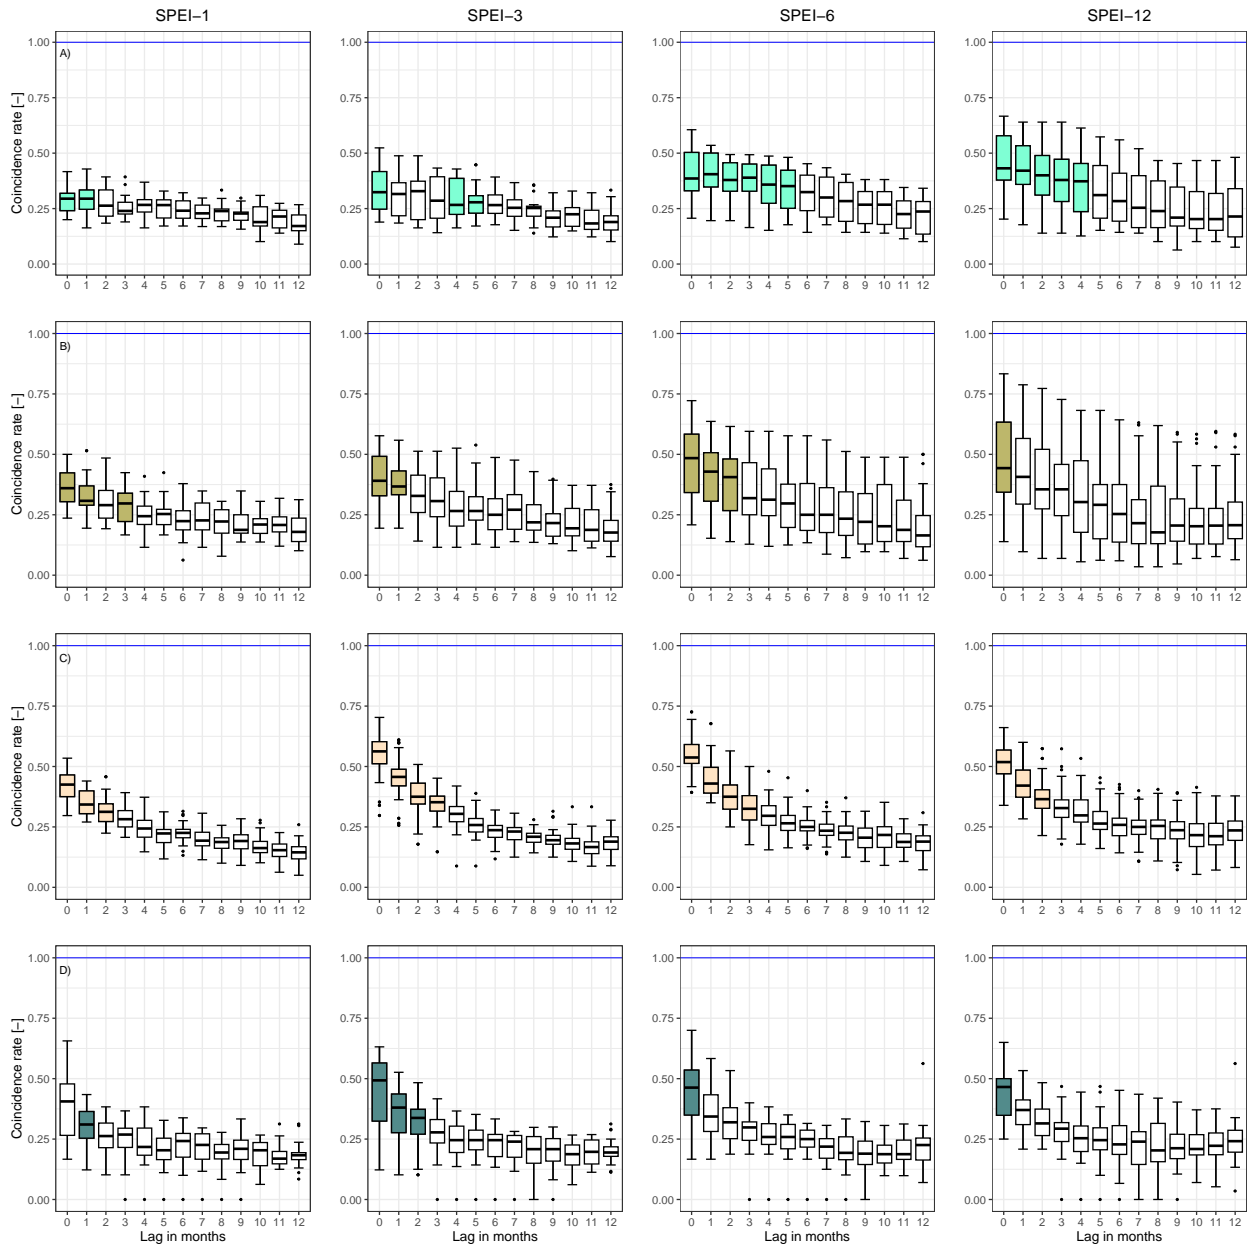

**Figure S28.** Event coincidence analysis results of the SPEI and the SSI-1 for moderate droughts at different lag periods (ranging from 0 to 12 months) for *i*) snow-dominated (a); *ii*) nivo-pluvial (b); *iii*) pluvio-nival (c); and *iv*) rain-dominated (d) catchments. The solid coloured boxplots indicate those lags where at least 75% of the catchments presented significant results at the 95% confidence interval, while the white boxplots indicate the opposite. The blue line indicates the optimal cross-correlation. The solid line within each box represents the median value, the edges of the boxes represent the first and third quartiles, and the whiskers extend to the most extreme data point which is no more than 1.5 times the interquartile range from the box.



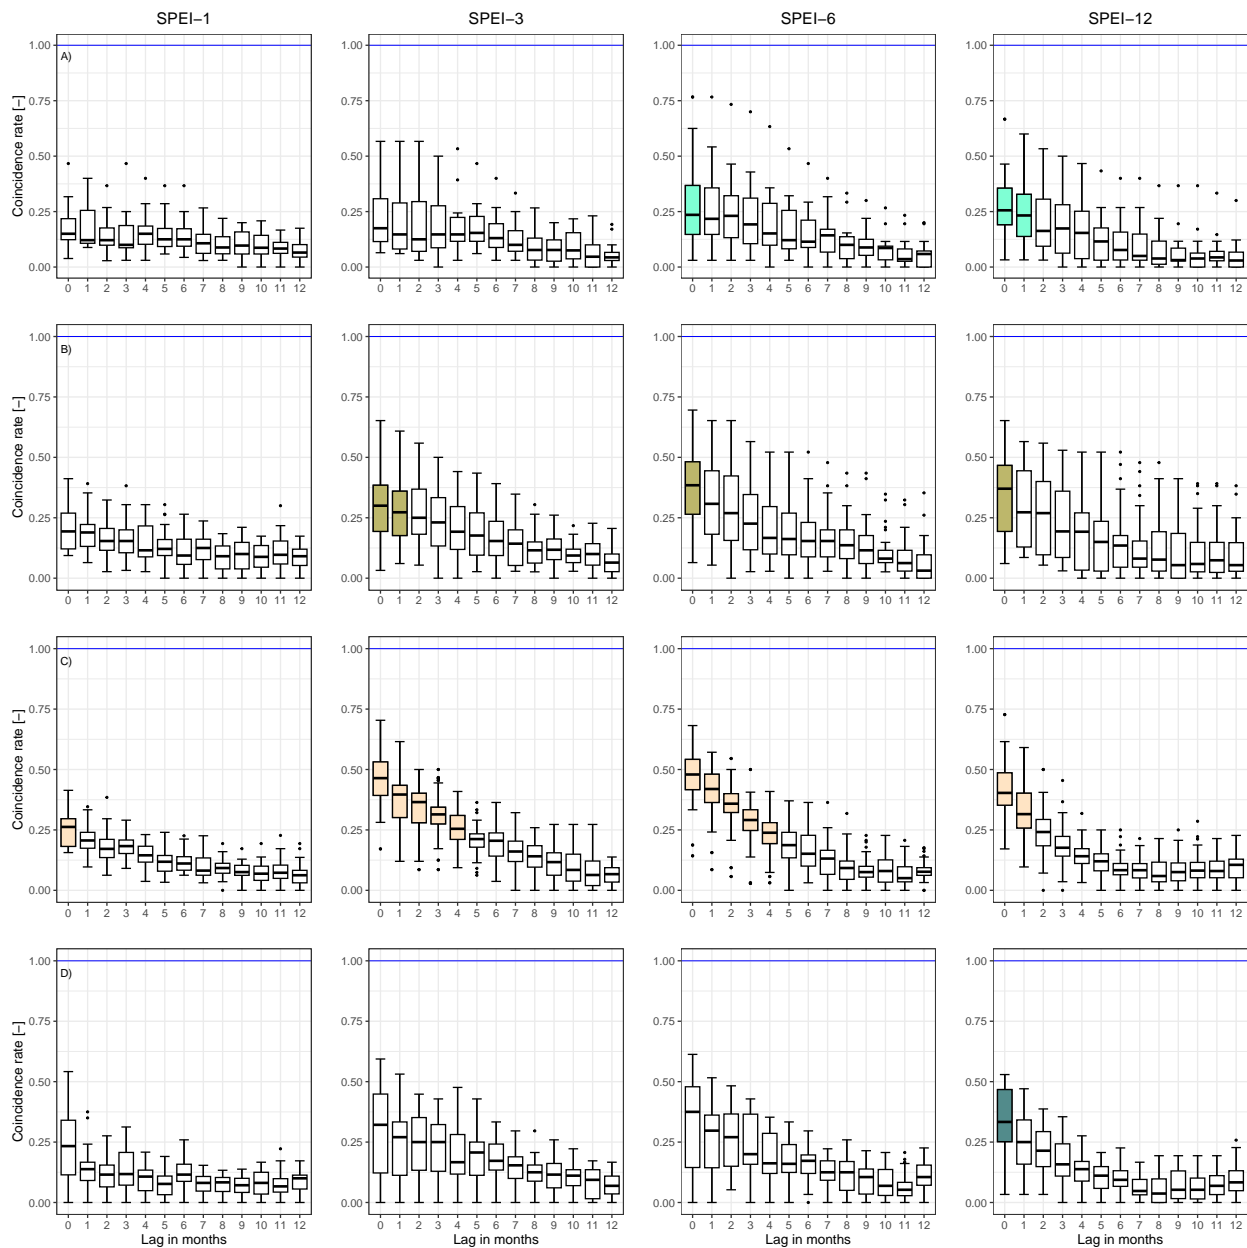

**Figure S29.** Event coincidence analysis results of the SPEI and the SSI-1 for severe droughts at different lag periods (ranging from 0 to 12 months) for *i*) snow-dominated (a); *ii*) nivo-pluvial (b); *iii*) pluvio-nival (c); and *iv*) rain-dominated (d) catchments. The solid coloured boxplots indicate those lags where at least 75% of the catchments presented significant results at the 95% confidence interval, while the white boxplots indicate the opposite. The blue line indicates the optimal cross-correlation. The solid line within each box represents the median value, the edges of the boxes represent the first and third quartiles, and the whiskers extend to the most extreme data point which is no more than 1.5 times the interquartile range from the box.

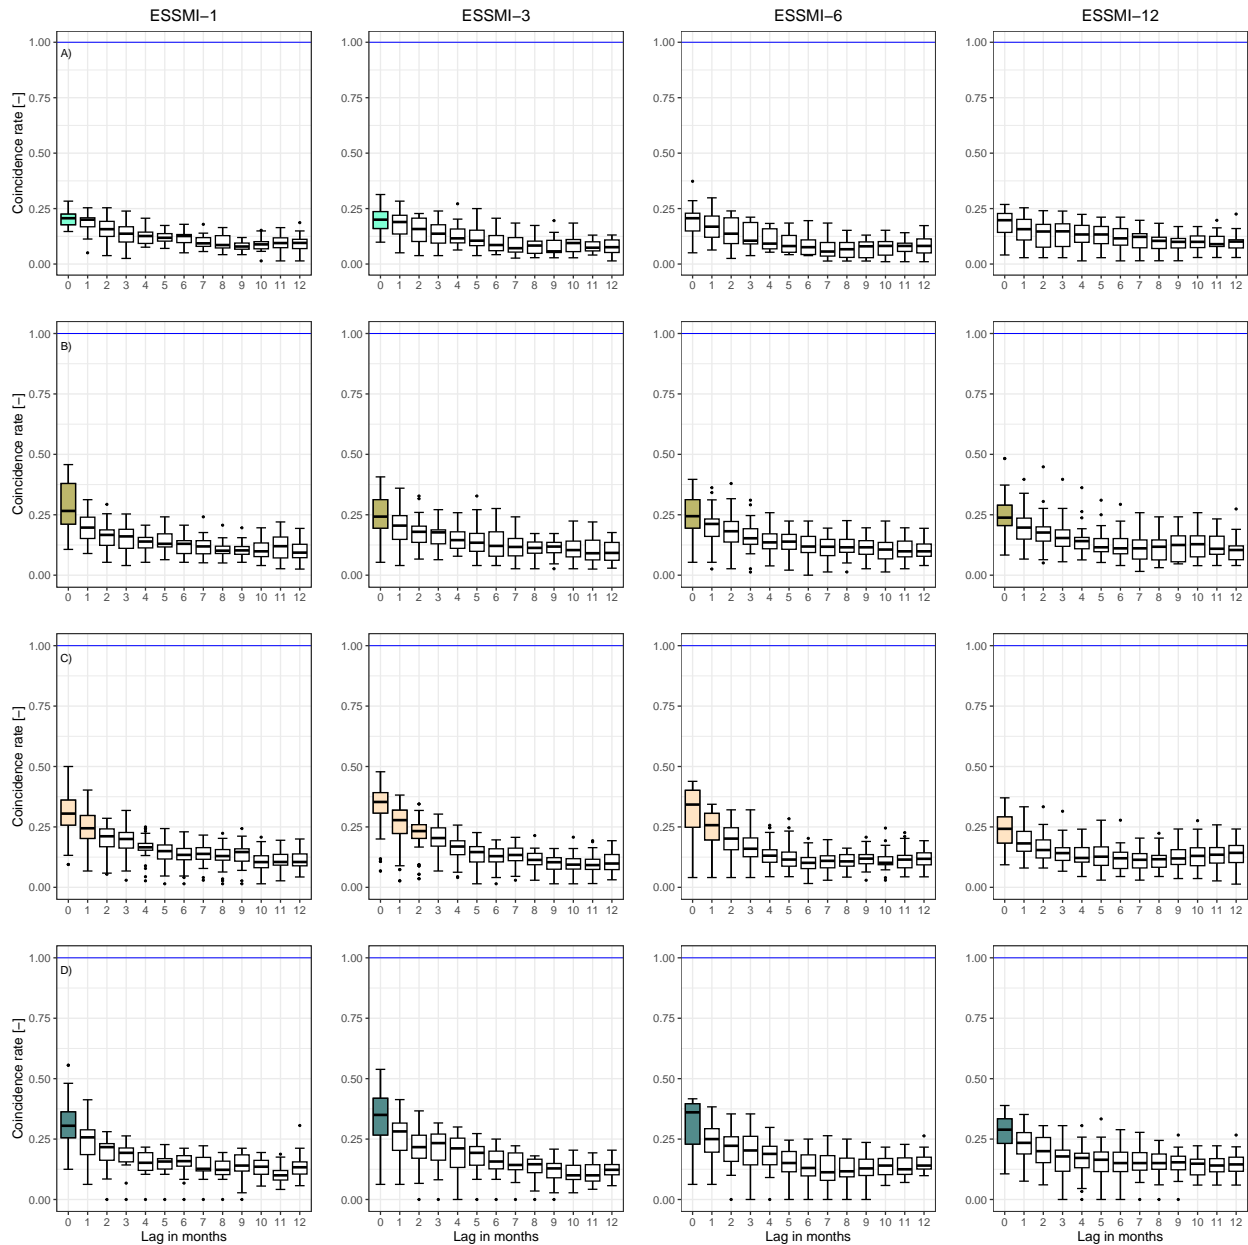

**Figure S30.** Event coincidence analysis results of the ESSMI and the SSI-1 for moderate droughts at different lag periods (ranging from 0 to 12 months) for *i*) snow-dominated (a); *ii*) nivo-pluvial (b); *iii*) pluvio-nival (c); and *iv*) rain-dominated (d) catchments. The solid coloured boxplots indicate those lags where at least 75% of the catchments presented significant results at the 95% confidence interval, while the white boxplots indicate the opposite. The blue line indicates the optimal cross-correlation. The solid line within each box represents the median value, the edges of the boxes represent the first and third quartiles, and the whiskers extend to the most extreme data point which is no more than 1.5 times the interquartile range from the box.

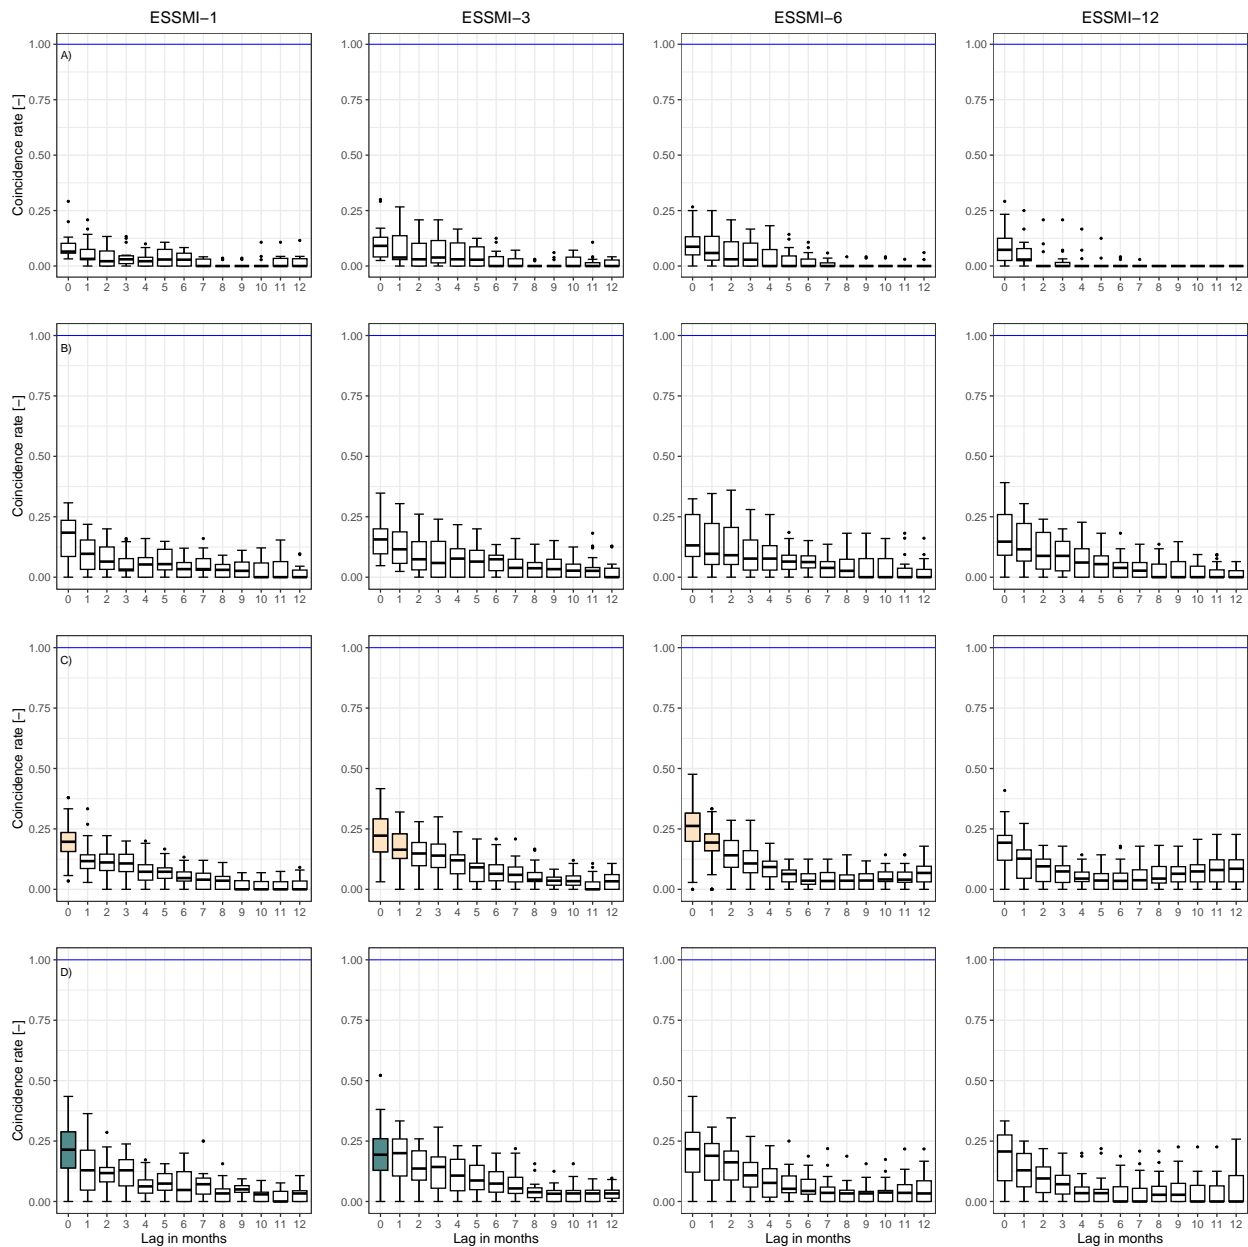

**Figure S31.** Event coincidence analysis results of the ESSMI and the SSI-1 for severe droughts at different lag periods (ranging from 0 to 12 months) for *i*) snow-dominated (a); *ii*) nivo-pluvial (b); *iii*) pluvio-nival (c); and *iv*) rain-dominated (d) catchments. The solid coloured boxplots indicate those lags where at least 75% of the catchments presented significant results at the 95% confidence interval, while the white boxplots indicate the opposite. The blue line indicates the optimal cross-correlation. The solid line within each box represents the median value, the edges of the boxes represent the first and third quartiles, and the whiskers extend to the most extreme data point which is no more than 1.5 times the interquartile range from the box.

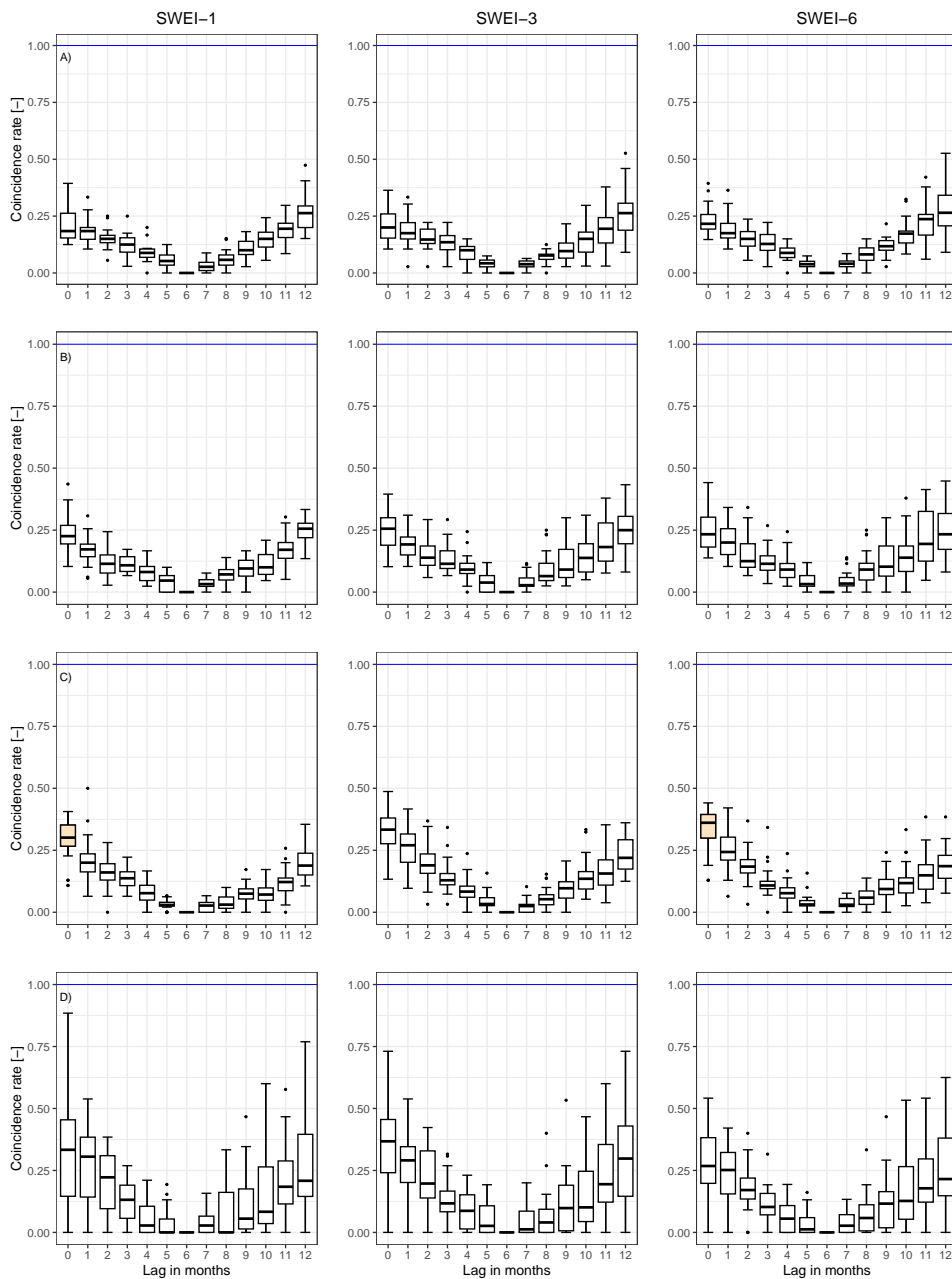

**Figure S32.** Event coincidence analysis results of the SWEI and the SSI-1 for moderate droughts at different lag periods (ranging from 0 to 12 months) for *i*) snow-dominated (a); *ii*) nivo-pluvial (b); *iii*) pluvio-nival (c); and *iv*) rain-dominated (d) catchments. The solid coloured boxplots indicate those lags where at least 75% of the catchments presented significant results at the 95% confidence interval, while the white boxplots indicate the opposite. The blue line indicates the optimal cross-correlation. The solid line within each box represents the median value, the edges of the boxes represent the first and third quartiles, and the whiskers extend to the most extreme data point which is no more than 1.5 times the interquartile range from the box.

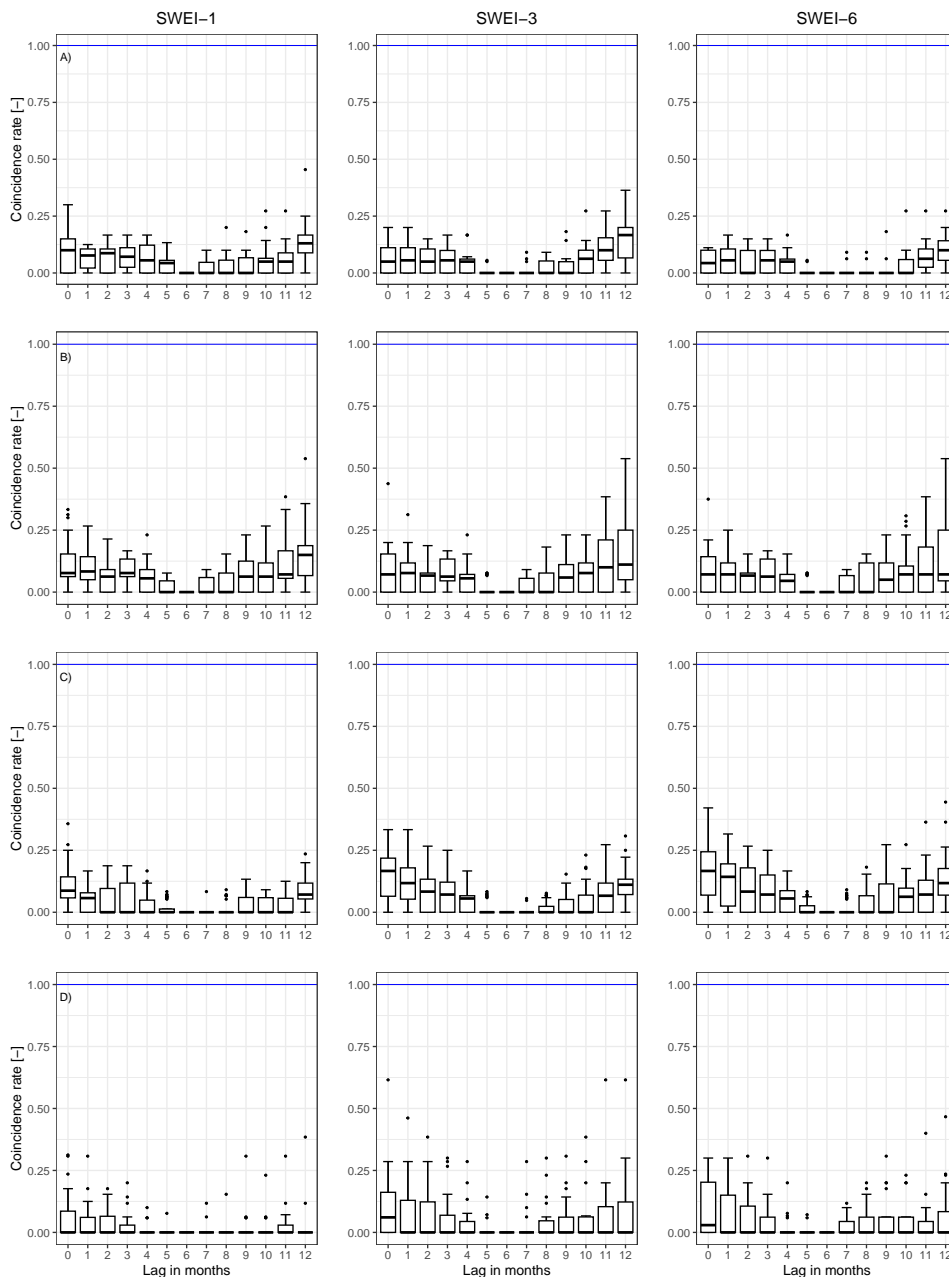

**Figure S33.** Event coincidence analysis results of the SWEI and the SSI-1 for severe droughts at different lag periods (ranging from 0 to 12 months) for *i*) snow-dominated (a); *ii*) nivo-pluvial (b); *iii*) pluvio-nival (c); and *iv*) rain-dominated (d) catchments. The solid coloured boxplots indicate those lags where at least 75% of the catchments presented significant results at the 95% confidence interval, while the white boxplots indicate the opposite. The blue line indicates the optimal cross-correlation. The solid line within each box represents the median value, the edges of the boxes represent the first and third quartiles, and the whiskers extend to the most extreme data point which is no more than 1.5 times the interquartile range from the box.

# 7. Difference between parametric and non-parametric

## 60 approach for soil moisture

To provide with insights into how the choice between parametric and non-parametric approaches may influence the analysis of drought indices, we computed a standardised soil moisture index using both a parametric approach with the gamma distribution and the non-parametric approach proposed by Carrão et al. (2016) (ESSMI) across all catchments. As expected, there are variations in the values computed through applying both approaches. Figure S34 illustrates these differences, computed as  
65 the "parametric approach" minus the "non-parametric approach", focusing on a nival and pluvial catchment.

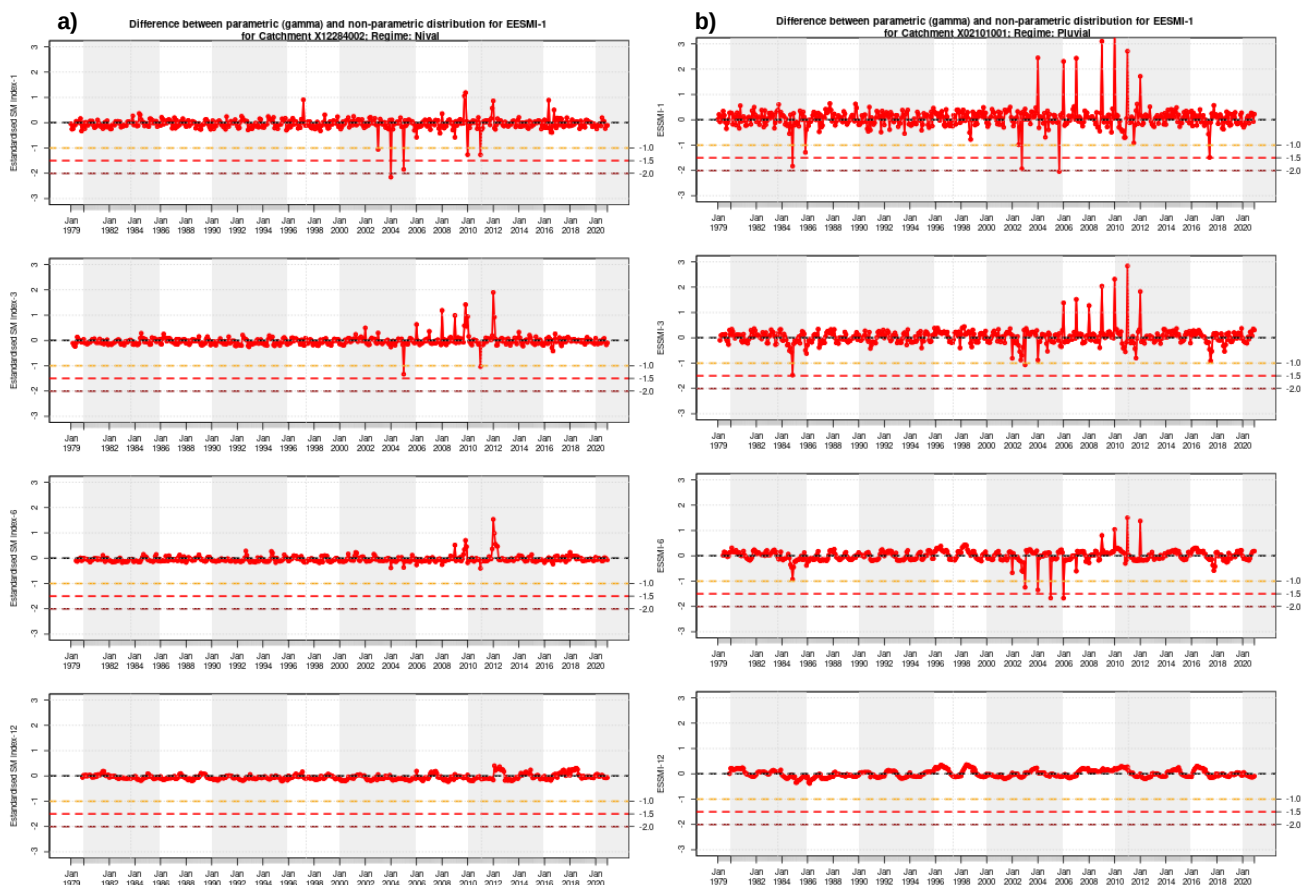

**Figure S34.** Differences between a standardised soil moisture index calculated with a parametric (gamma distribution) and non-parametric (ESSMI) approach for scales ranging from 1 to 12 months. Panel *a* shows these differences over a Nival catchment, while panel *b* over a pluvial catchment.

# 8. Summary of the selected catchments

Table S6: Summary of the catchments used in this study with their respective hydrological regimes and distinct properties. Mean *Q*, Mean *P*, Aridity Index, Baseflow Index, *P* seasonality represents mean annual values computed based on CR2MET data for April 1979 - March 2011, following the definitions provided in CAMELS-CL Alvarez-Garreton et al. (2018)

| ID      | Station Name                                | Long.   | Lat.   | Hydrological Regime | Area [km <sup>2</sup> ] | Dominant Land Cover (%) | Dominant Geology            | Min. Elev. [m asl] | Mean Q [mm/d] | Mean P [mm] | Aridity Index | Baseflow Index | P Seas. |
|---------|---------------------------------------------|---------|--------|---------------------|-------------------------|-------------------------|-----------------------------|--------------------|---------------|-------------|---------------|----------------|---------|
| 1310002 | Rio San Jose En Ausipar                     | -69.81  | -18.58 | Pluvial             | 1281.47                 | Shrublands (84.89)      | Acid volcanic rocks         | 1246               | NA            | 184.47      | 4.71          | NA             | 1.48    |
| 1410004 | Rio Codpa En Calacala                       | -69.67  | -18.83 | Pluvial             | 370.66                  | Shrublands (90.99)      | Intermediate volcanic rocks | 2242               | NA            | 204.86      | 4.16          | NA             | 1.45    |
| 1730003 | Rio Coscaya En Saitoco                      | -68.93  | -19.86 | Pluvial             | 171.18                  | Shrublands (70.5)       | Pyroclastics                | 3964               | NA            | 203.83      | 3.6           | NA             | 1.44    |
| 2101001 | Rio Loa Antes Represa Lequena               | -68.66  | -21.66 | Pluvial             | 2053.28                 | Barren (84.27)          | Intermediate volcanic rocks | 3289               | 0.02          | 169.27      | 5.1           | 0.89           | 1.42    |
| 3414001 | Rio Pulido En Vertedero                     | -69.94  | -28.09 | Nival               | 2021.8                  | Barren (63.39)          | Acid plutonic rocks         | 1295               | 0.07          | 130.59      | 6.05          | 0.83           | -0.96   |
| 3430003 | Rio Copiapo En Pastillo                     | -69.97  | -28    | Nivo-pluvial        | 7463.88                 | Barren (70.75)          | Acid plutonic rocks         | 1136               | NA            | 100.99      | 7.93          | NA             | -0.92   |
| 4311001 | Estero Derecho En Alcohuz                   | -70.49  | -30.22 | Nival               | 338.24                  | Barren (69.04)          | Acid plutonic rocks         | 1647               | 0.36          | 245.47      | 2.81          | 0.81           | -1.12   |
| 4313001 | Rio Cochiguaz En El Peñon                   | -70.43  | -30.12 | Nival               | 675.35                  | Barren (66.49)          | Acid plutonic rocks         | 1338               | 0.39          | 195.6       | 3.61          | 0.84           | -1.13   |
| 4314002 | Rio Claro En Rivadavia                      | -70.55  | -29.98 | Nival               | 1512.82                 | Barren (61.51)          | Acid plutonic rocks         | 803                | 0.27          | 208.66      | 3.82          | 0.83           | -1.11   |
| 4511002 | Rio Grande En Las Ramadas                   | -70.58  | -31.01 | Nival               | 568.53                  | Barren (66.62)          | Acid plutonic rocks         | 1377               | 0.76          | 323.42      | 2.37          | 0.78           | -1.12   |
| 4512001 | Rio Tascadero En Desembocadura              | -70.66  | -31.01 | Nival               | 241.01                  | Barren (51.09)          | Acid plutonic rocks         | 1219               | 0.56          | 344.37      | 2.61          | 0.7            | -1.23   |
| 4513001 | Rio Grande En Cuyano                        | -70.77  | -30.92 | Nival               | 1286.61                 | Barren (49.02)          | Acid plutonic rocks         | 871                | 0.58          | 315.59      | 2.89          | 0.75           | -1.21   |
| 4514001 | Rio Mostazal En Cuestecita                  | -70.61  | -30.81 | Nival               | 393.68                  | Barren (50.17)          | Acid plutonic rocks         | 1235               | 0.41          | 402.68      | 1.72          | 0.76           | -0.99   |
| 4515002 | Rio Mostazal En Caren                       | -70.77  | -30.84 | Pluvio-nival        | 640.15                  | Shrublands (57.63)      | Acid plutonic rocks         | 690                | 0.22          | 365.46      | 2.32          | 0.69           | -1.07   |
| 4520001 | Rio Los Molles En Ojos De Agua              | -70.44  | -30.74 | Nival               | 155.32                  | Barren (70.11)          | Acid plutonic rocks         | 2372               | 0.09          | 368.51      | 1.35          | 0.72           | -0.86   |
| 4522002 | Rio Rapel En Junta                          | -70.87  | -30.71 | Pluvio-nival        | 820.55                  | Shrublands (59.82)      | Acid plutonic rocks         | 494                | 0.21          | 349.18      | 2.38          | 0.67           | -1.05   |
| 4523002 | Rio Grande En Puntilla San Juan             | -70.92  | -30.7  | Nivo-pluvial        | 3529.4                  | Shrublands (60.05)      | Acid plutonic rocks         | 425                | 0.29          | 323.57      | 2.87          | 0.72           | -1.15   |
| 4530001 | Rio Cogoti En Fraguaita                     | -70.885 | -31.11 | Nivo-pluvial        | 490.52                  | Shrublands (50.35)      | Acid plutonic rocks         | 1008               | 0.48          | 322.56      | 3.15          | 0.71           | -1.27   |
| 4531002 | Rio Cogoti Entrada Embalse Cogoti           | -71.04  | -31.03 | Nivo-pluvial        | 753.07                  | Shrublands (62.28)      | Acid plutonic rocks         | 638                | NA            | 300.4       | 3.73          | NA             | -1.3    |
| 4533002 | Rio Pama En Valle Hermoso                   | -70.99  | -31.27 | Pluvial             | 155.65                  | Shrublands (71.29)      | Mixed sedimentary rocks     | 1026               | NA            | 327.88      | 2.99          | NA             | -1.29   |
| 4703002 | Rio Choapa En Cuncumen                      | -70.59  | -31.97 | Nival               | 1131.63                 | Barren (63.55)          | Acid volcanic rocks         | 1153               | 0.79          | 371.34      | 2.11          | 0.75           | -1.18   |
| 4712001 | Rio Chalinga En La Palmilla                 | -70.72  | -31.7  | Nivo-pluvial        | 243.9                   | Barren (57.19)          | Acid volcanic rocks         | 1430               | NA            | 298.09      | 2.65          | NA             | -1.28   |
| 5101001 | Rio Pedernal En Tejada                      | -70.76  | -32.07 | Nivo-pluvial        | 81.13                   | Shrublands (70.92)      | Acid volcanic rocks         | 1335               | NA            | 401.02      | 2.47          | NA             | -1.25   |
| 5100001 | Rio Sobrante En Piadero                     | -70.71  | -32.23 | Nivo-pluvial        | 241.08                  | Shrublands (56.84)      | Acid volcanic rocks         | 1135               | 0.42          | 456.16      | 1.98          | 0.78           | -1.21   |
| 5721001 | Estero Yerba Loca Antes Junta San Francisco | -70.36  | -33.34 | Nival               | 109.95                  | Barren (69.57)          | Pyroclastics                | 1348               | NA            | 534.08      | 0.91          | NA             | -1.13   |
| 6027001 | Rio Claro En El Valle                       | -70.87  | -34.69 | Nivo-pluvial        | 349.38                  | Shrublands (35.42)      | Acid volcanic rocks         | 538                | 2.86          | 1485.27     | 0.64          | 0.63           | -1.16   |

Continued on next page ...

Table S6: Summary of the catchments used in this study with their respective hydrological regimes and distinct properties. Mean  $Q$ , Mean  $P$ , Aridity Index, Baseflow Index,  $P$  seasonality represents mean annual values computed based on CR2MET data for April 1979 - March 2011, following the definitions provided in CAMELS-CL Alvarez-Garreton et al. (2018)

| ID      | Station Name                            | Long.  | Lat.   | Hydrological Regime | Area [km <sup>2</sup> ] | Dominant Land Cover (%) | Dominant Geology         | Min. Elev. [m asl] | Mean Q [mm/d] | Mean P [mm] | Aridity Index | Baseflow Index | P Seas. |
|---------|-----------------------------------------|--------|--------|---------------------|-------------------------|-------------------------|--------------------------|--------------------|---------------|-------------|---------------|----------------|---------|
| 7103001 | Rio Claro En Los Queñes                 | -70.81 | -35    | Nivo-pluvial        | 354.41                  | Barren (36.36)          | Acid volcanic rocks      | 662                | 4.86          | 1785.19     | 0.53          | 0.7            | -1.11   |
| 7115001 | Rio Palos En Junta Con Colorado         | -71.02 | -35.27 | Nivo-pluvial        | 490                     | Barren (55.32)          | Basic volcanic rocks     | 581                | 5.22          | 1964.94     | 0.45          | 0.8            | -1.07   |
| 7116001 | Estero Upeo En Upeo                     | -71.09 | -35.17 | Pluvial             | 367.17                  | Native forest(51.56)    | Acid volcanic rocks      | 421                | 1.76          | 1543.58     | 0.75          | 0.52           | -1.17   |
| 7330001 | Rio Perquilauquen En San Manuel         | -71.62 | -36.38 | Pluvio-nival        | 502.4                   | Native forest(48.27)    | Acid volcanic rocks      | 265                | 5.68          | 2068.05     | 0.53          | 0.55           | -1.04   |
| 7350003 | Rio Longavi En El Castillo              | -71.34 | -36.26 | Pluvio-nival        | 466.85                  | Shrublands (42.83)      | Acid volcanic rocks      | 606                | 6.68          | 2085.89     | 0.48          | 0.57           | -1.04   |
| 7354002 | Rio Achibueno En La Recova              | -71.44 | -36    | Pluvio-nival        | 894.35                  | Native forest(41.22)    | Unconsolidated sediments | 301                | NA            | 2018.07     | 0.53          | NA             | -1.07   |
| 7372001 | Rio Claro En Camarico                   | -71.38 | -35.18 | Pluvial             | 703.01                  | Native forest(37.64)    | Acid volcanic rocks      | 152                | 2.4           | 1498.95     | 0.77          | 0.6            | -1.14   |
| 7374001 | Rio Lirca En Puente Las Rastras         | -71.29 | -35.49 | Pluvio-nival        | 382.3                   | Native forest(55.51)    | Acid volcanic rocks      | 232                | 3.27          | 1740.1      | 0.62          | 0.57           | -1.11   |
| 8104001 | Rio Saucos Antes Junta Con Nuble        | -71.27 | -36.67 | Nivo-pluvial        | 606.7                   | Shrublands (49.13)      | Acid volcanic rocks      | 684                | 4.63          | 1952.76     | 0.55          | 0.68           | -1.04   |
| 8117005 | Rio Chillan En Camino A Confluencia     | -72.32 | -36.62 | Pluvio-nival        | 798.54                  | Shrublands (28.8)       | Unconsolidated sediments | 34                 | NA            | 1594.98     | 0.76          | NA             | -1      |
| 8123001 | Rio Itata En Chologuan                  | -72.07 | -37.15 | Pluvial             | 860.06                  | Native forest(40.51)    | Acid volcanic rocks      | 202                | 4.28          | 1834.61     | 0.61          | 0.64           | -0.89   |
| 8124002 | Rio Itata En Trilaleo                   | -72.18 | -37.07 | Pluvio-nival        | 1148.24                 | Native forest(35.62)    | Pyroclastics             | 149                | 3.18          | 1776.51     | 0.64          | 0.56           | -0.9    |
| 8130002 | Rio Diguillin En San Lorenzo (Atacalco) | -71.58 | -36.92 | Pluvio-nival        | 204.41                  | Shrublands (40.61)      | Acid volcanic rocks      | 712                | 7.01          | 2484.67     | 0.39          | 0.57           | -0.93   |
| 8132001 | Rio Diguillin En Longitudinal           | -72.33 | -36.87 | Pluvio-nival        | 1300.45                 | Native forest(30.77)    | Unconsolidated sediments | 65                 | 3.17          | 1925.93     | 0.59          | 0.59           | -0.95   |
| 8317001 | Rio Biobio En Rucalhue                  | -71.9  | -37.71 | Pluvio-nival        | 7252.47                 | Shrublands (38.08)      | Acid volcanic rocks      | 222                | 5.19          | 2147.49     | 0.47          | 0.7            | -0.86   |
| 8334001 | Rio Biobio En Coihue                    | -72.59 | -37.55 | Pluvio-nival        | 11147.78                | Native forest(31.76)    | Unconsolidated sediments | 33                 | NA            | 2039.05     | 0.52          | NA             | -0.87   |
| 8342001 | Rio Renaico En Longitudinal             | -72.38 | -37.85 | Pluvio-nival        | 688.23                  | Native forest(63.98)    | Acid plutonic rocks      | 117                | 5.32          | 2520.08     | 0.42          | 0.6            | -0.83   |
| 8351001 | Rio Malleco En Colipulli                | -72.44 | -37.96 | Pluvio-nival        | 415.08                  | Native forest(46.77)    | Basic volcanic rocks     | 142                | 5.42          | 2394.15     | 0.44          | 0.57           | -0.82   |
| 9122002 | Rio Blanco En Curacautin                | -71.87 | -38.45 | Pluvio-nival        | 170.91                  | Native forest(42.89)    | Basic volcanic rocks     | 552                | NA            | 3074.75     | 0.31          | NA             | -0.75   |
| 9123001 | Rio Cautin En Rari-Ruca                 | -72.01 | -38.43 | Pluvio-nival        | 1306.14                 | Native forest(52.11)    | Pyroclastics             | 407                | 6.02          | 2747.88     | 0.35          | 0.75           | -0.76   |
| 9127001 | Rio Mucu En Puente Mucu                 | -72.42 | -38.62 | Pluvio-nival        | 650.26                  | Native forest(39.25)    | Unconsolidated sediments | 156                | 3.36          | 1977.9      | 0.56          | 0.64           | -0.74   |
| 9129002 | Rio Cautin En Cajon                     | -72.5  | -38.69 | Pluvio-nival        | 2755.57                 | Native forest(39.09)    | Pyroclastics             | 104                | 4.35          | 2215.61     | 0.47          | 0.7            | -0.76   |
| 9134001 | Rio Huichahue En Faja 24000             | -72.33 | -38.85 | Pluvio-nival        | 348.01                  | Native forest(58.93)    | Unconsolidated sediments | 113                | NA            | 2175.55     | 0.43          | NA             | -0.7    |
| 9135001 | Rio Quepe En Quepe                      | -72.62 | -38.85 | Pluvio-nival        | 1665.56                 | Native forest(39.46)    | Basic volcanic rocks     | 39                 | 4.52          | 1996.98     | 0.52          | 0.68           | -0.71   |
| 9140001 | Rio Cautin En Almagro                   | -72.95 | -38.78 | Pluvio-nival        | 5547.33                 | Native forest(33.84)    | Basic volcanic rocks     | 5                  | 4.14          | 1970.08     | 0.54          | 0.67           | -0.75   |
| 9402001 | Rio Allipen En Melipeuco                | -71.73 | -38.87 | Pluvio-nival        | 829.6                   | Native forest(50.54)    | Acid plutonic rocks      | 437                | NA            | 2390.43     | 0.38          | NA             | -0.77   |
| 9404001 | Rio Allipen En Los Laureles             | -72.23 | -38.98 | Pluvio-nival        | 1675.11                 | Native forest(47.75)    | Pyroclastics             | 193                | 6.88          | 2346.96     | 0.42          | 0.77           | -0.73   |
| 9405001 | Rio Curaco En Colico                    | -72.08 | -39.03 | Pluvio-nival        | 414.22                  | Native forest(67.47)    | Basic volcanic rocks     | 311                | NA            | 2676.95     | 0.36          | NA             | -0.68   |
| 9412001 | Rio Trancura En Curarrehue              | -71.58 | -39.36 | Pluvio-nival        | 356.92                  | Native forest(63.59)    | Acid plutonic rocks      | 369                | 7.29          | 3264.22     | 0.28          | 0.66           | -0.75   |

Continued on next page ...



Table S6: Summary of the catchments used in this study with their respective hydrological regimes and distinct properties. Mean  $Q$ , Mean  $P$ , Aridity Index, Baseflow Index,  $P$  seasonality represents mean annual values computed based on CR2MET data for April 1979 - March 2011, following the definitions provided in CAMELS-CL Alvarez-Garreton et al. (2018)

| ID       | Station Name                                   | Long.  | Lat.   | Hydrological Regime | Area [km <sup>2</sup> ] | Dominant Land Cover (%) | Dominant Geology                | Min. Elev. [m asl] | Mean Q [mm/d] | Mean P [mm] | Aridity Index | Baseflow Index | P Seas. |
|----------|------------------------------------------------|--------|--------|---------------------|-------------------------|-------------------------|---------------------------------|--------------------|---------------|-------------|---------------|----------------|---------|
| 9414001  | Rio Trancura Antes Rio Liafenco                | -71.77 | -39.33 | Pluvio-nival        | 1379.35                 | Native forest(64.68)    | Pyroclastics                    | 350                | 7.04          | 2864.46     | 0.33          | 0.71           | -0.75   |
| 9416001  | Rio Liucura En Liucura                         | -71.82 | -39.26 | Pluvio-nival        | 349.01                  | Native forest(74.25)    | Acid plutonic rocks             | 275                | 7.5           | 2692.36     | 0.36          | 0.7            | -0.7    |
| 9420001  | Rio Tolten En Villarica                        | -72.23 | -39.27 | Pluvio-nival        | 2933.65                 | Native forest(59.68)    | Pyroclastics                    | 193                | 7.45          | 2799.48     | 0.34          | 0.82           | -0.71   |
| 9433001  | Rio Puyehue En Quitratue                       | -72.67 | -39.15 | Pluvio-nival        | 153.46                  | Native forest(44.47)    | Metamorphics                    | 66                 | 3.82          | 1876.36     | 0.6           | 0.63           | -0.81   |
| 9434001  | Rio Donguil En Gorbear                         | -72.68 | -39.1  | Pluvio-nival        | 769.73                  | Grassland(47.44)        | Siliciclastic sedimentary rocks | 62                 | 3.53          | 1879.81     | 0.62          | 0.65           | -0.79   |
| 9437002  | Rio Tolten En Teodoro Schmidt                  | -73.08 | -39.01 | Pluvio-nival        | 7926.85                 | Native forest(47.54)    | Siliciclastic sedimentary rocks | 5                  | NA            | 2376.65     | 0.43          | NA             | -0.73   |
| 10102001 | Rio Lique En Lique                             | -71.85 | -39.73 | Pluvio-nival        | 367.86                  | Native forest(74.24)    | Acid plutonic rocks             | 215                | NA            | 3193.72     | 0.29          | NA             | -0.71   |
| 10111001 | Rio San Pedro En Desague Lago Rinihue          | -72475 | -39.77 | Pluvio-nival        | 4385.55                 | Native forest(47.85)    | Acid plutonic rocks             | 86                 | NA            | 2866.61     | 0.33          | NA             | -0.69   |
| 10121001 | Rio Collileufu En Los Lagos                    | -72825 | -39.86 | Pluvial             | 626.25                  | Native forest(47.34)    | Metamorphics                    | 10                 | NA            | 1606.48     | 0.67          | NA             | -0.79   |
| 10122001 | Rio Calle Calle En Balsa San Javier            | -72.61 | -40.57 | Pluvial             | 6618.95                 | Native forest(48.99)    | Acid plutonic rocks             | 4                  | NA            | 2593.92     | 0.37          | NA             | -0.69   |
| 10134001 | Rio Cruces En Rucaco                           | -72.9  | -39.55 | Pluvial             | 1802.6                  | Native forest(44.05)    | Siliciclastic sedimentary rocks | 4                  | 4.1           | 2121.55     | 0.5           | 0.65           | -0.74   |
| 10137001 | Rio Inaque En Mafil                            | -72.95 | -39.67 | Pluvial             | 538.96                  | Native forest(43.33)    | Metamorphics                    | 4                  | NA            | 1800.31     | 0.57          | NA             | -0.76   |
| 10304001 | Rio Calcurrupe En Desembocadura                | -72.27 | -40.25 | Pluvio-nival        | 1725.81                 | Native forest(67.1)     | Acid plutonic rocks             | 45                 | NA            | 3074.86     | 0.29          | NA             | -0.61   |
| 10306001 | Rio Nilahue En Mayay                           | -72.23 | -40.27 | Pluvio-nival        | 308.59                  | Native forest(46.95)    | Pyroclastics                    | 116                | NA            | 3410.55     | 0.26          | NA             | -0.58   |
| 10328001 | Rio Pilmaiquen En San Pablo                    | -73    | -40.38 | Pluvio-nival        | 2473.21                 | Native forest(38.87)    | Pyroclastics                    | 6                  | 6.18          | 2785.3      | 0.34          | 0.79           | -0.56   |
| 10343001 | Rio Coihueco Antes Junta Pichicope             | -72.7  | -40.93 | Pluvial             | 313.34                  | Native forest(62.72)    | Basic volcanic rocks            | 128                | NA            | 2692.54     | 0.33          | NA             | -0.46   |
| 10356001 | Rio Negro En Chahuilco                         | -73.23 | -40.71 | Pluvial             | 2279.73                 | Grassland(61.39)        | Siliciclastic sedimentary rocks | 8                  | NA            | 1565.27     | 0.64          | NA             | -0.65   |
| 10362001 | Rio Damas En Tacamo                            | -73.06 | -40.62 | Pluvial             | 466.78                  | Grassland(73.63)        | Siliciclastic sedimentary rocks | 20                 | NA            | 1620.89     | 0.65          | NA             | -0.61   |
| 10363002 | Rio Forrahue En Aromos                         | -73.13 | -40.89 | Pluvial             | 169.01                  | Grassland(66.83)        | Siliciclastic sedimentary rocks | 34                 | NA            | 1503.64     | 0.72          | NA             | -0.6    |
| 10364001 | Rio Rahue En Forrahue                          | -73.28 | -40.52 | Pluvial             | 5602.99                 | Grassland(54.65)        | Siliciclastic sedimentary rocks | 2                  | NA            | 1860.73     | 0.53          | NA             | -0.59   |
| 11141001 | Rio Cisnes En Estancia Rio Cisnes              | -71.55 | -44.59 | Nivo-pluvial        | 1105.64                 | Grassland(48.54)        | Siliciclastic sedimentary rocks | 559                | NA            | 586.98      | 1.49          | NA             | -0.5    |
| 11143001 | Rio Cisnes Antes Junta Rio Moro                | -71.81 | -44.66 | Nivo-pluvial        | 2258.36                 | Grassland(36.19)        | Basic volcanic rocks            | 466                | NA            | 959.52      | 0.88          | NA             | -0.49   |
| 11143002 | Rio Moro Antes Junta Rio Cisnes                | -72.72 | -44.75 | Nivo-pluvial        | 133.9                   | Native forest(40.01)    | Acid plutonic rocks             | 484                | NA            | 1316.19     | 0.59          | NA             | -0.47   |
| 11302001 | Rio Nireguao En Villa Mañiguales               | -72.12 | -45.15 | Nivo-pluvial        | 1997                    | Grassland(36.73)        | Basic volcanic rocks            | 133                | 1.47          | 772.55      | 1.08          | 0.69           | -0.38   |
| 11307001 | Rio Emperador Guillermo Antes Junta Mañiguales | -72.23 | -45.23 | Nivo-pluvial        | 565.93                  | Native forest(39.85)    | Basic volcanic rocks            | 92                 | NA            | 1325.96     | 0.58          | NA             | -0.26   |
| 11308001 | Rio Magniguales Antes Junta Rio Simpson        | -72.47 | -45.38 | Nivo-pluvial        | 4363.64                 | Native forest(41.63)    | Acid plutonic rocks             | 8                  | NA            | 1363.36     | 0.58          | NA             | -0.3    |
| 12452001 | Rio Perez En Desembocadura                     | -71.97 | -52.55 | Nivo-pluvial        | 308.23                  | Native forest(51.15)    | Unconsolidated sediments        | 0                  | NA            | 761.44      | 0.79          | NA             | 0.31    |
| 12582001 | Rio San Juan En Desembocadura                  | -70.97 | -53.65 | Nivo-pluvial        | 864.01                  | Shrublands(41.51)       | Siliciclastic sedimentary rocks | 0                  | 1.81          | 750.38      | 0.81          | 0.6            | 0.21    |

Continued on next page ...

Table S6: Summary of the catchments used in this study with their respective hydrological regimes and distinct properties. Mean  $Q$ , Mean  $P$ , Aridity Index, Baseflow Index,  $P$  seasonality represents mean annual values computed based on CR2MET data for April 1979 - March 2011, following the definitions provided in CAMELS-CL Alvarez-Garreton et al. (2018)

| ID       | Station Name                          | Long.  | Lat.   | Hydrological Regime | Area [km <sup>2</sup> ] | Dominant Land Cover (%) | Dominant Geology                | Min. Elev. [m asl] | Mean Q [mm/d] | Mean P [mm] | Aridity Index | Baseflow Index | P Seas. |
|----------|---------------------------------------|--------|--------|---------------------|-------------------------|-------------------------|---------------------------------|--------------------|---------------|-------------|---------------|----------------|---------|
| 12585001 | Rio Tres Brazos Antes Bt. Sendos      | -70.98 | -53.28 | Nivo-pluvial        | 100                     | Native forest(53.89)    | Siliciclastic sedimentary rocks | 12                 | NA            | 627.74      | 1.07          | NA             | 0.15    |
| 12586001 | Rio Las Minas En Bt. Sendos           | -70.99 | -53.14 | Nivo-pluvial        | 35.55                   | Shrublands (46.59)      | Siliciclastic sedimentary rocks | 157                | NA            | 526.23      | 1.35          | NA             | 0.11    |
| 12600001 | Rio Rubens En Ruta N 9                | -71.94 | -52.03 | Nivo-pluvial        | 504.45                  | Native forest(45.56)    | Mixed sedimentary rocks         | 143                | 1.93          | 879.86      | 0.72          | 0.61           | 0.26    |
| 12802001 | Rio Side En Cerro Sombrero            | -69.28 | -52.77 | Pluvial             | 808.55                  | Shrublands (53.46)      | Siliciclastic sedimentary rocks | 11                 | 0.15          | 352.15      | 2.12          | 0.72           | 0.18    |
| 12805001 | Rio Oscar En Bahia San Felipe         | -69.75 | -52.85 | Pluvial             | 559.57                  | Shrublands (51.36)      | Unconsolidated sediments        | 8                  | 0.31          | 399.93      | 1.78          | 0.75           | 0.24    |
| 12876001 | Rio Grande En Tierra Del Fuego        | -68.88 | -53.89 | Nivo-pluvial        | 2841.02                 | Shrublands (38.48)      | Siliciclastic sedimentary rocks | 81                 | 0.85          | 691.09      | 0.92          | 0.77           | 0.3     |
| 12284002 | Rio Baguales En Cerro Guido           | -72.48 | -51.02 | Nival               | 564.25                  | Grassland (37)          | Siliciclastic sedimentary rocks | 49                 | 0.45          | 276.81      | 2.77          | 0.63           | 0.42    |
| 12284003 | Rio Vizcachas En Cerro Guido          | -72.48 | -51.02 | Nival               | 1729.66                 | Shrublands (14.42)      | Siliciclastic sedimentary rocks | 11                 | 0.26          | 218.81      | 3.89          | 0.68           | 0.42    |
| 12284006 | Rio Las Chinas En Cerro Guido         | -72.52 | -51.05 | Nival               | 901.46                  | Shrublands (38.12)      | Siliciclastic sedimentary rocks | 48                 | 0.73          | 465.94      | 1.58          | 0.57           | 0.34    |
| 12284007 | Rio Las Chinas Antes Desague Del Toro | -72.52 | -51.25 | Nival               | 3936.75                 | Shrublands (26.06)      | Siliciclastic sedimentary rocks | 11                 | NA            | 311.51      | 2.58          | NA             | 0.32    |
| 12285001 | Rio Chorrillos Tres Pasos Ruta N 9    | -72.47 | -51.45 | Pluvio-nival        | 101.13                  | Grassland (42.72)       | Siliciclastic sedimentary rocks | 158                | 0.29          | 613.53      | 1.29          | 0.57           | 0.18    |

## **9. Median monthly P and Q values for all catchments**

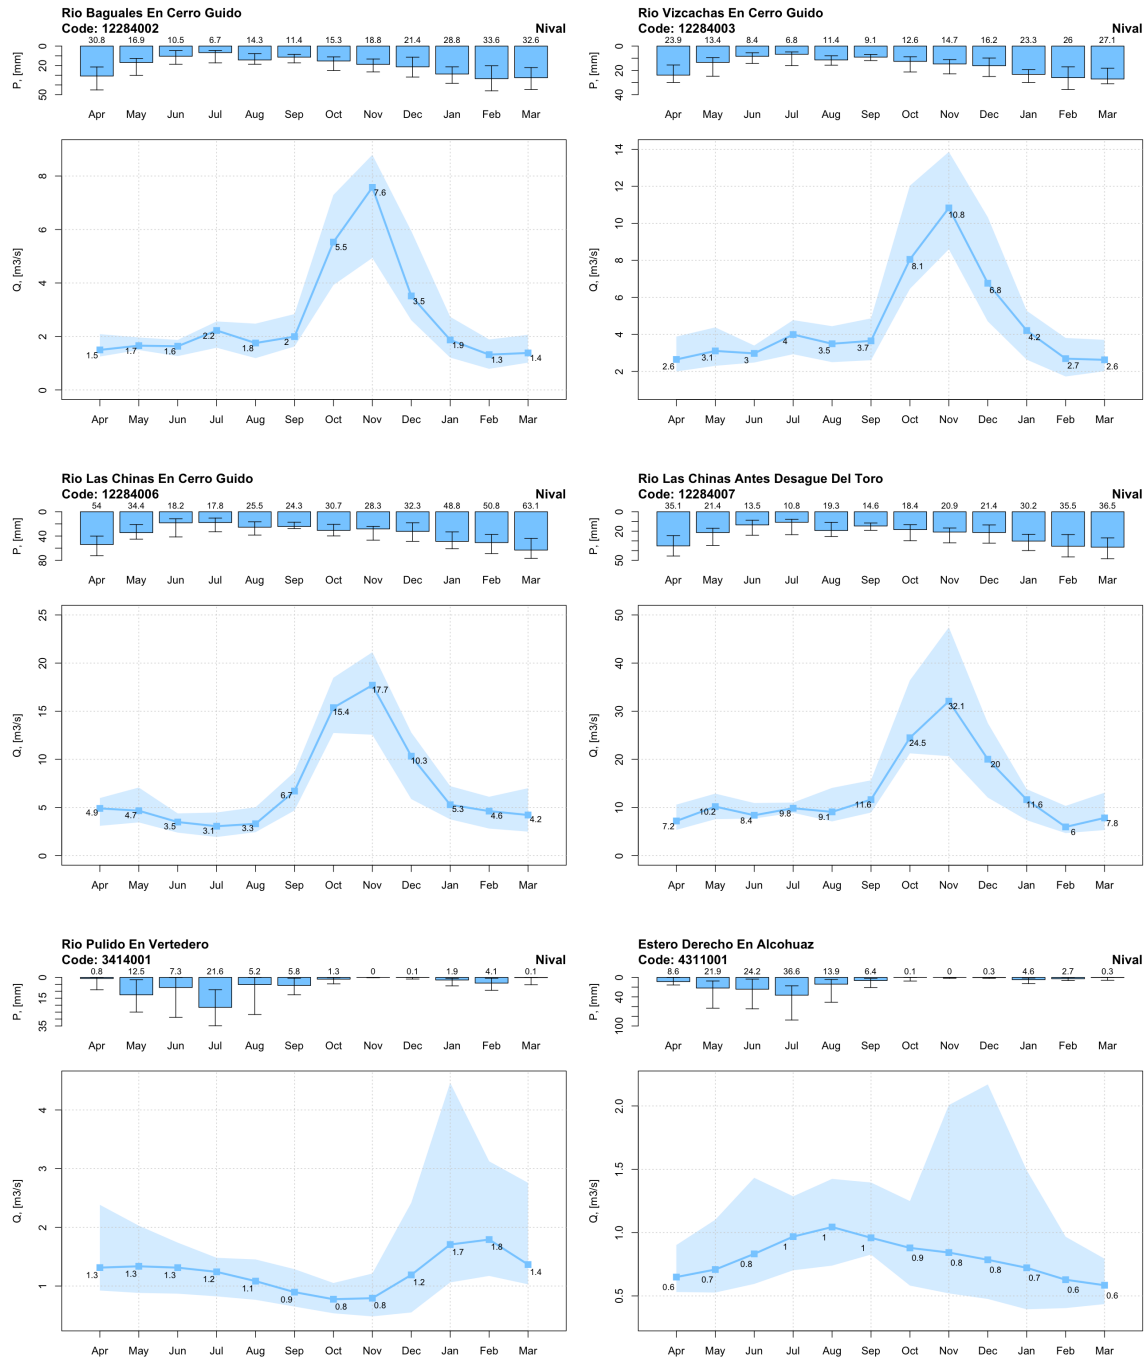

**Figure S35.** Median monthly precipitation (top panels) and streamflow (bottom panels) values for catchments 12284002, 12284003, 12284006, 12284007, 3414001, 4311001. Error bars in precipitations and shaded areas in streamflows range from quantile 2.5 to 97.5.

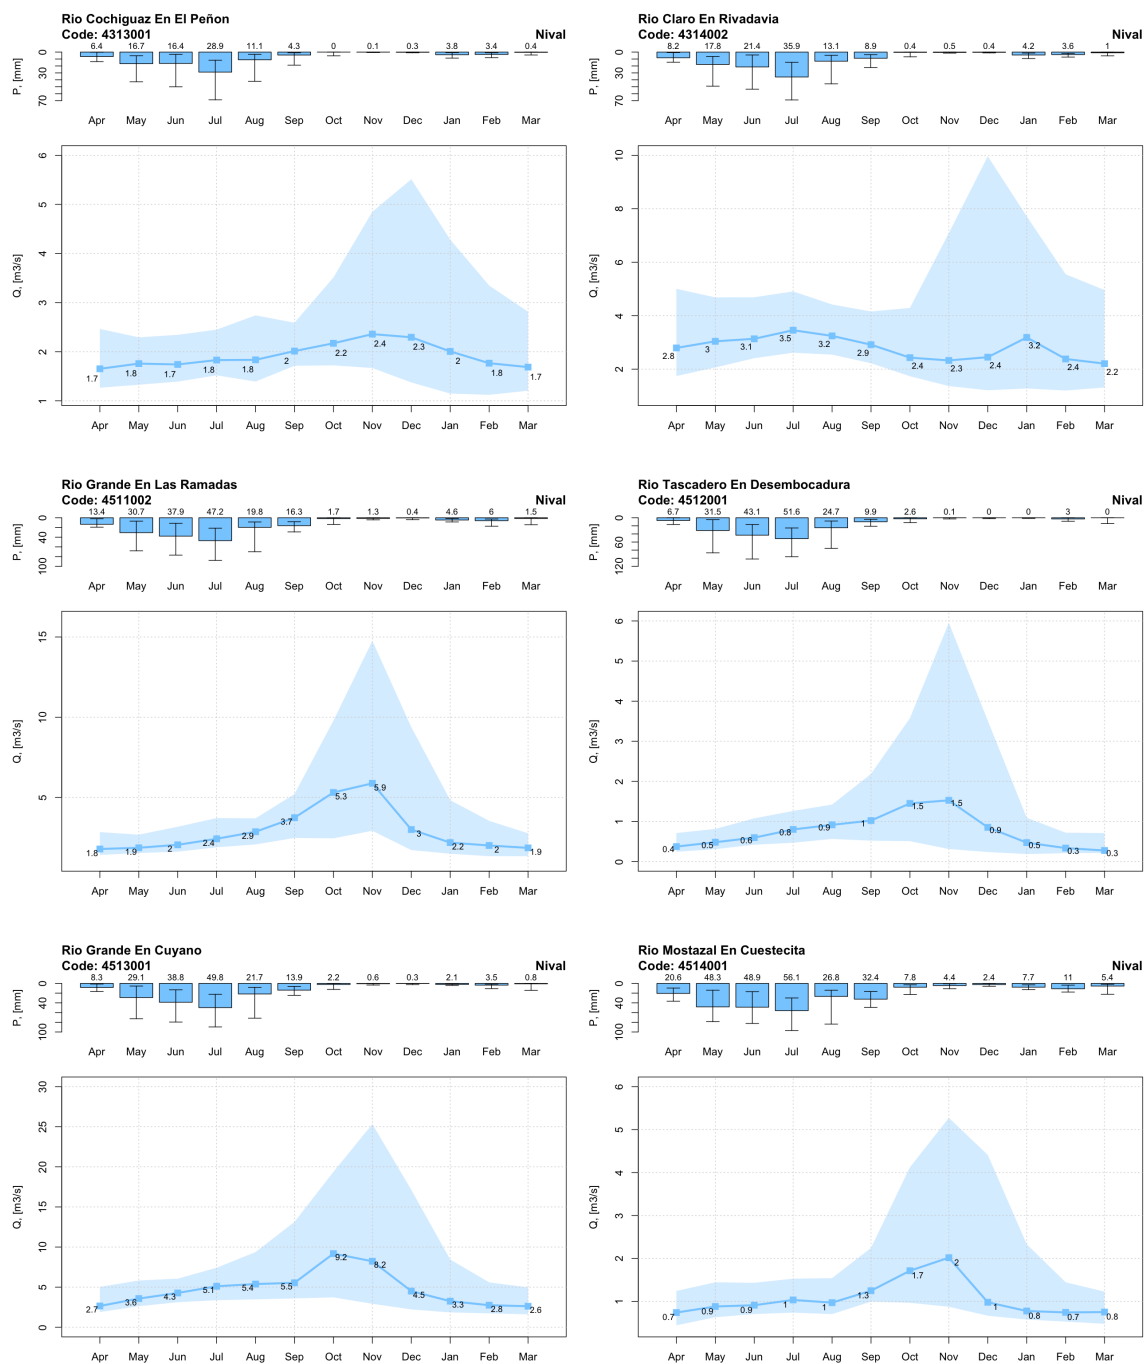

**Figure S36.** Median monthly precipitation (top panels) and streamflow (bottom panels) values for catchments 4313001, 4314002, 4511002, 4512001, 4513001, 4514001. Error bars in precipitations and shaded areas in streamflows range from quantile 2.5 to 97.5.

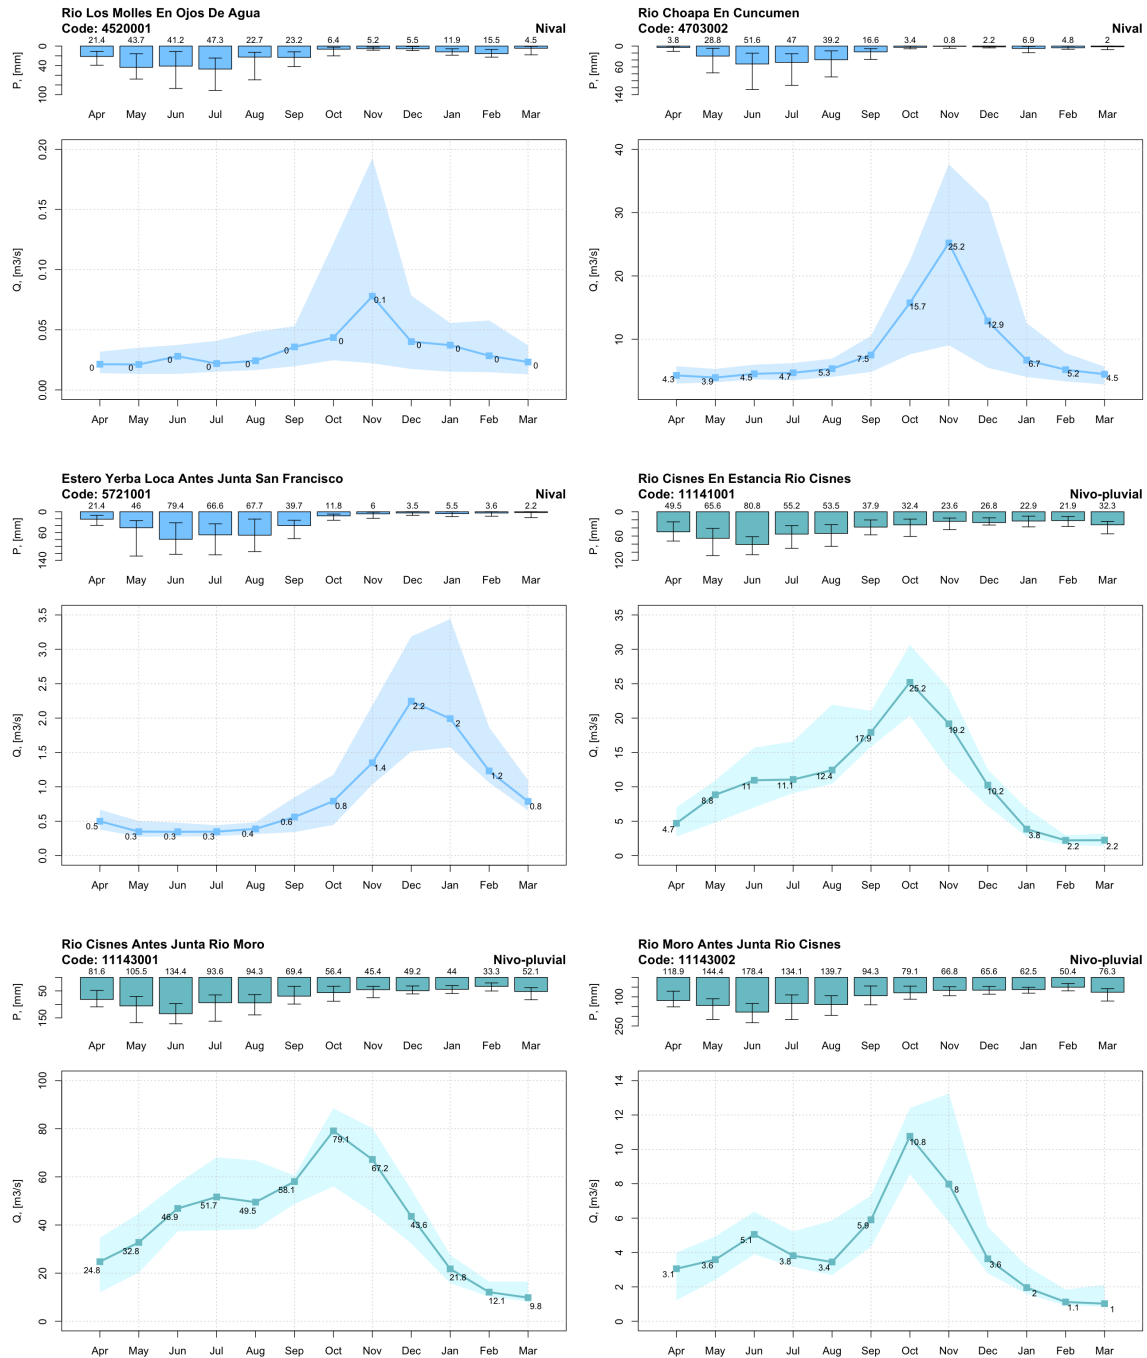

**Figure S37.** Median monthly precipitation (top panels) and streamflow (bottom panels) values for catchments 4520001, 4703002, 5721001, 11141001, 111430001, 11143002. Error bars in precipitations and shaded areas in streamflows range from quantile 2.5 to 97.5.

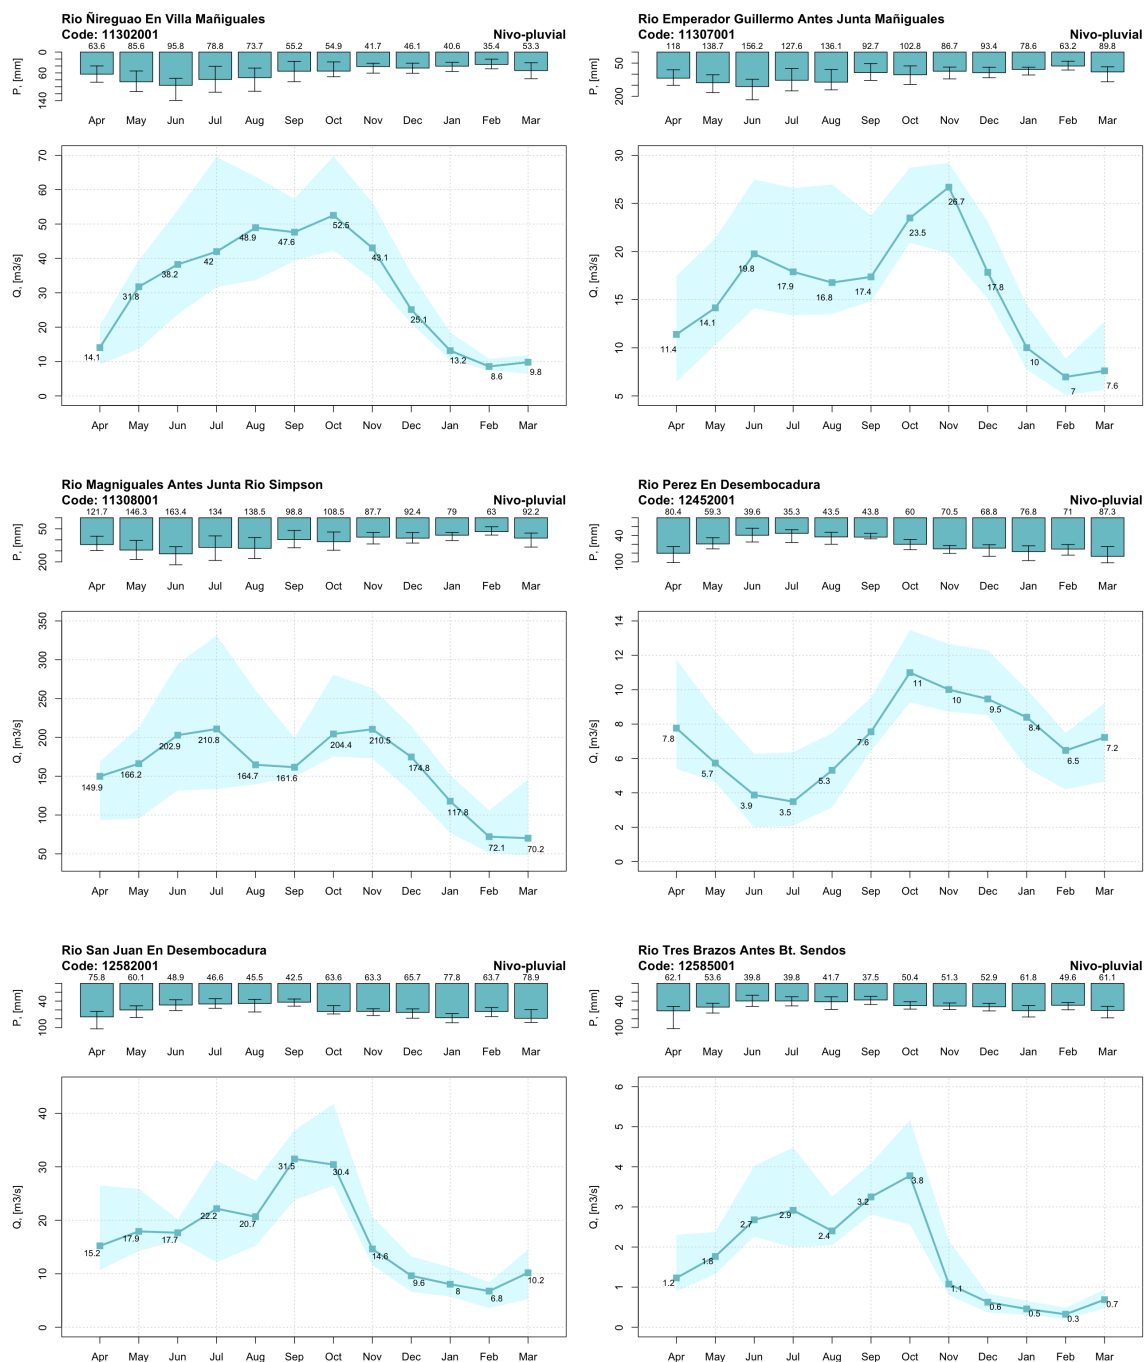

**Figure S38.** Median monthly precipitation (top panels) and streamflow (bottom panels) values for catchments 11302001, 11307001, 11308001, 12452001, 12582001, 12585001. Error bars in precipitations and shaded areas in streamflows range from quantile 2.5 to 97.5.

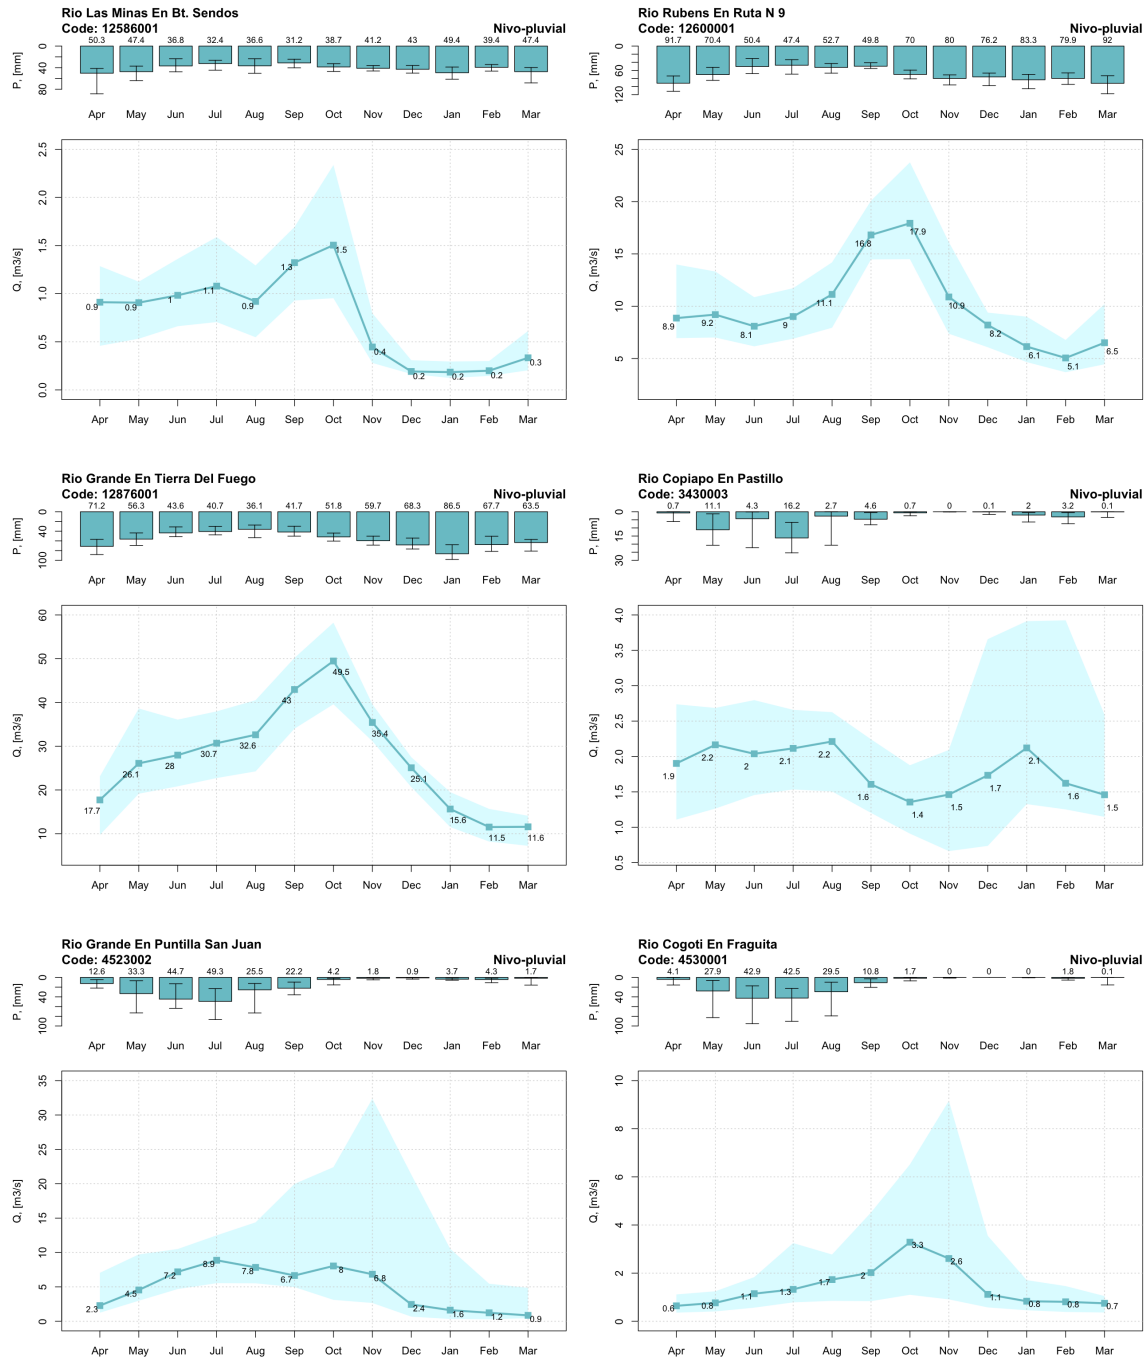

**Figure S39.** Median monthly precipitation (top panels) and streamflow (bottom panels) values for catchments 12586001, 12600001, 12876001, 3430003, 4523002, 4530001. Error bars in precipitations and shaded areas in streamflows range from quantile 2.5 to 97.5.



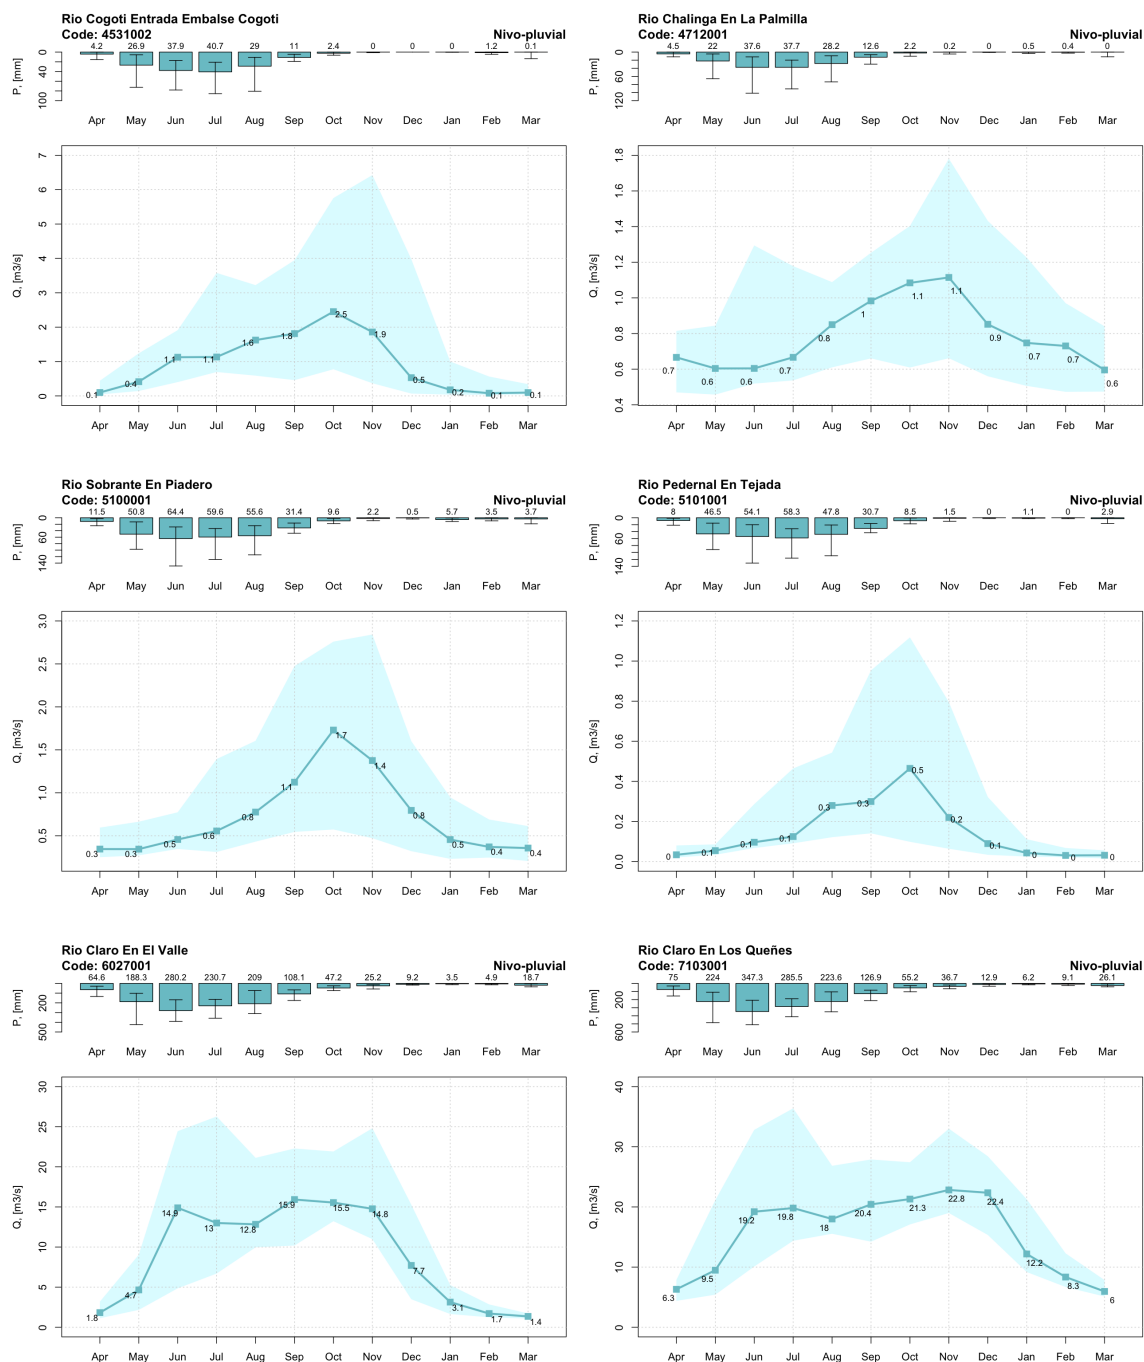

**Figure S40.** Median monthly precipitation (top panels) and streamflow (bottom panels) values for catchments 4531002, 4712001, 5100001, 5101001, 6027001, 7103001. Error bars in precipitations and shaded areas in streamflows range from quantile 2.5 to 97.5.

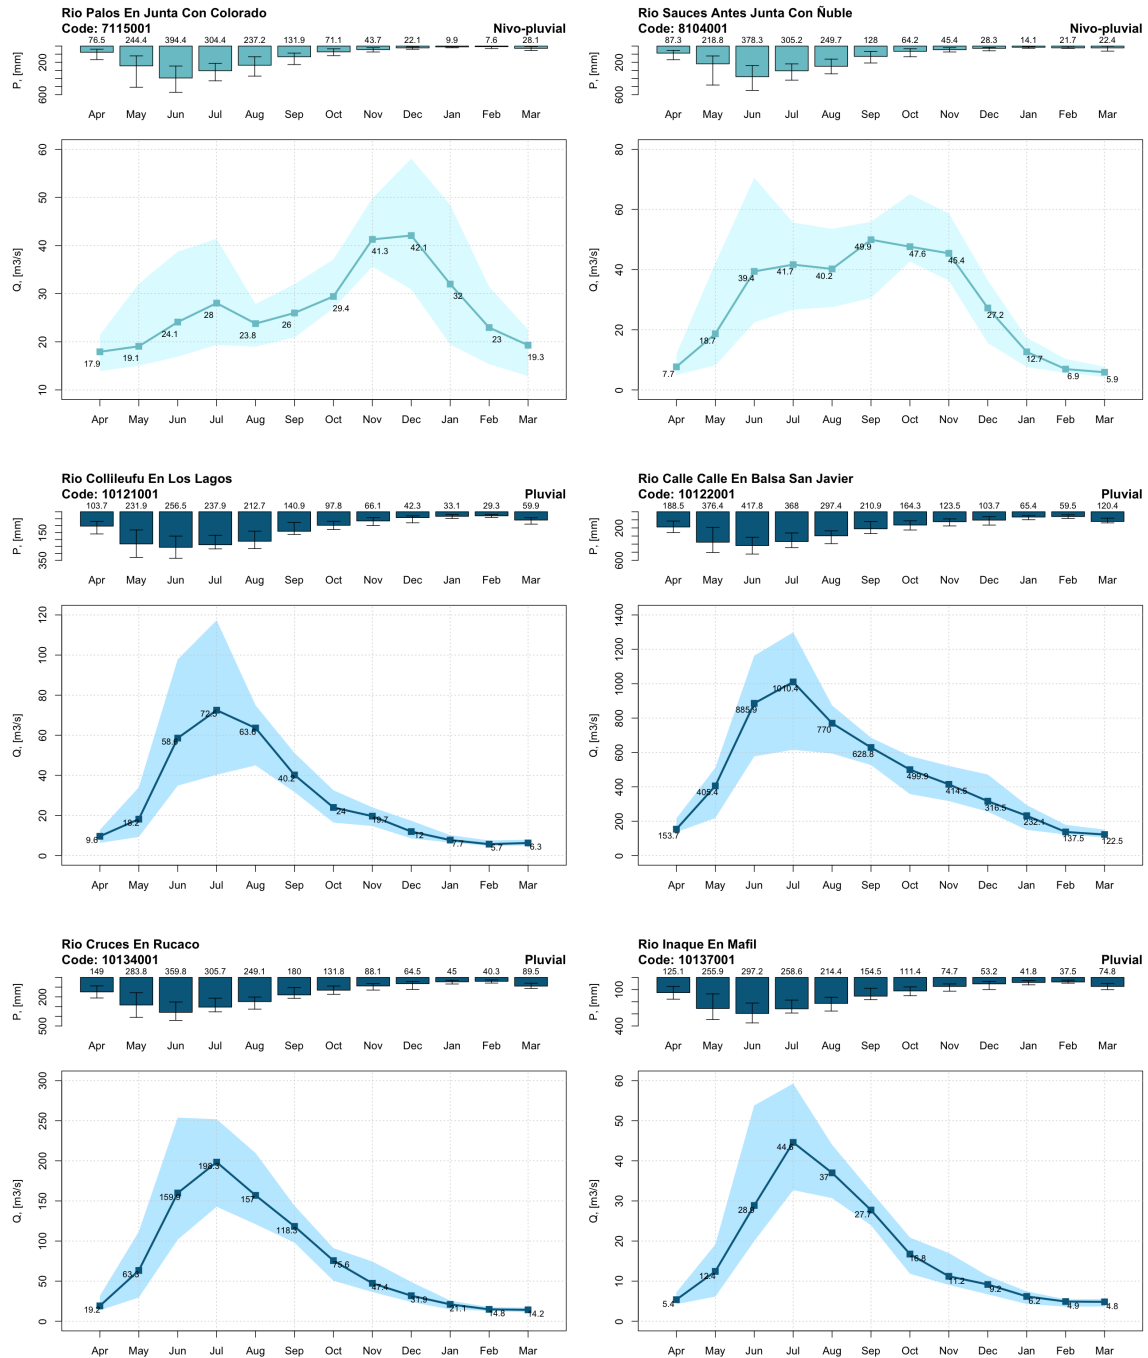

**Figure S41.** Median monthly precipitation (top panels) and streamflow (bottom panels) values for catchments 7115001, 8104001, 10121001, 10122001, 10134001, 10137001. Error bars in precipitations and shaded areas in streamflows range from quantile 2.5 to 97.5.

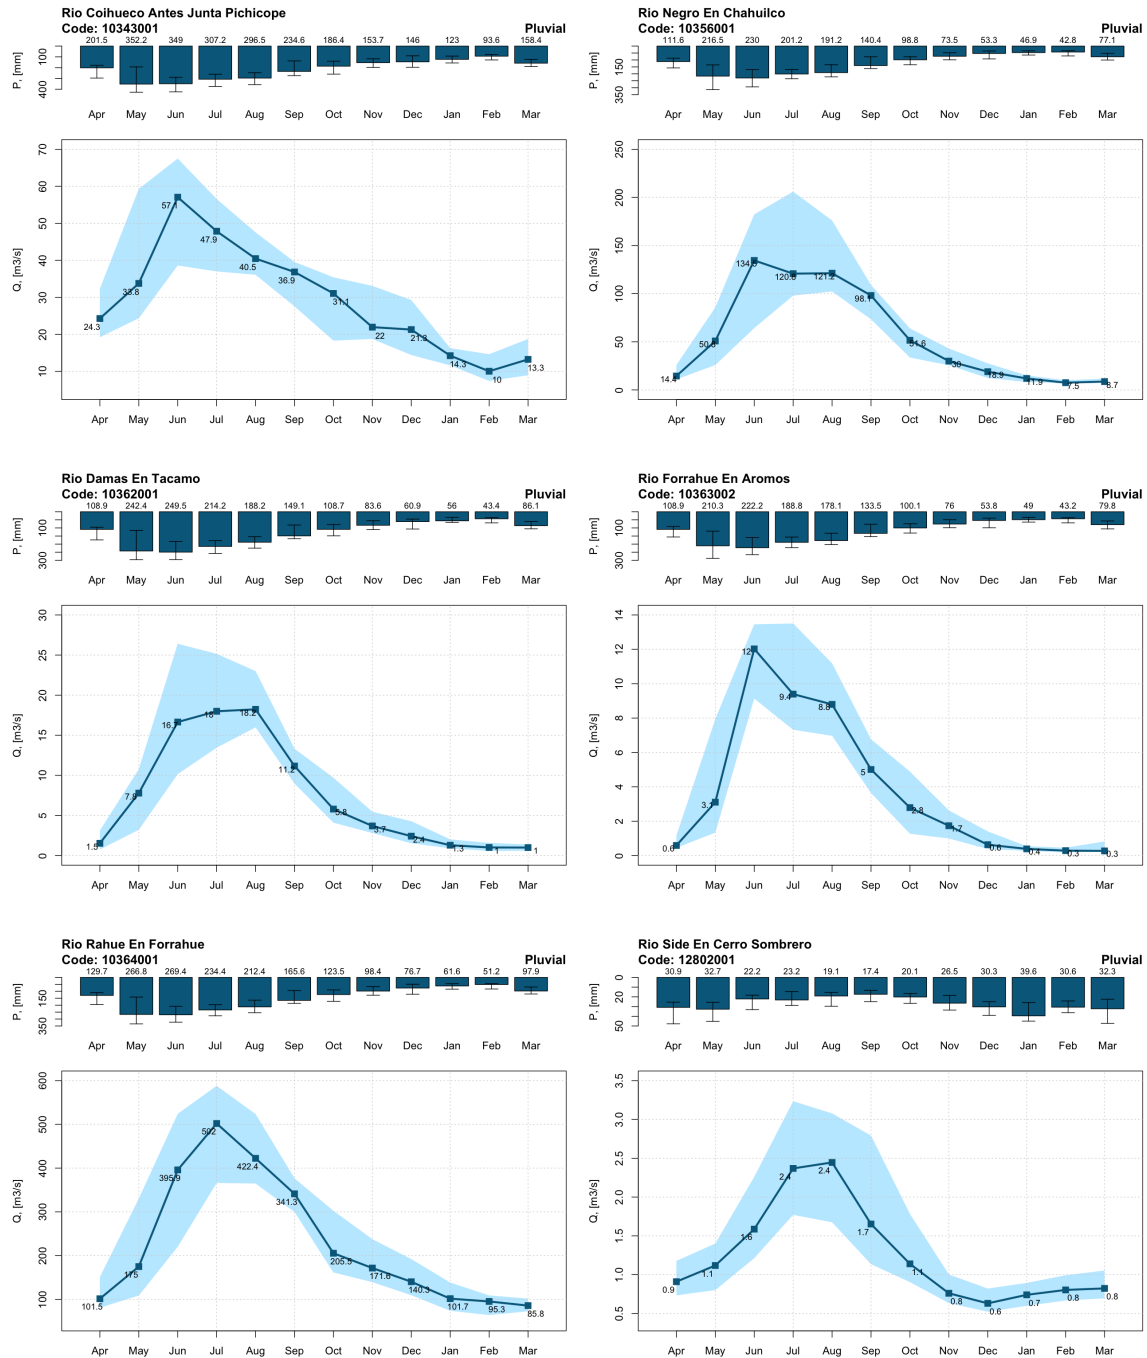

**Figure S42.** Median monthly precipitation (top panels) and streamflow (bottom panels) values for catchments 10343001, 10356001, 10362001, 10363002, 10364001, 12802001. Error bars in precipitations and shaded areas in streamflows range from quantile 2.5 to 97.5.

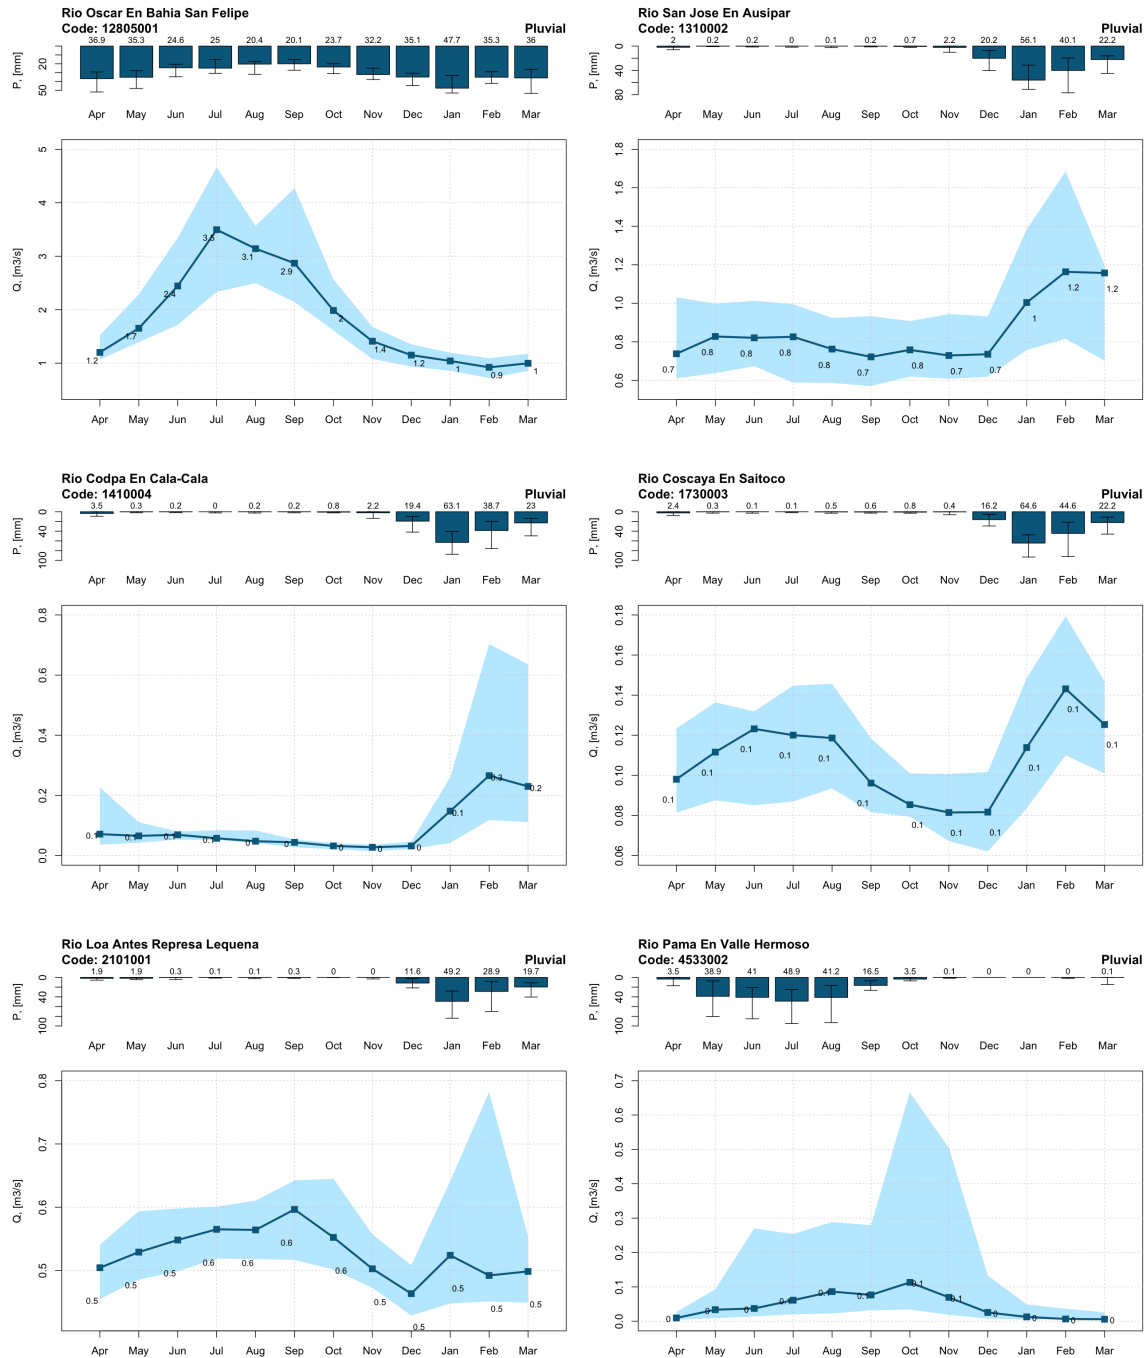

**Figure S43.** Median monthly precipitation (top panels) and streamflow (bottom panels) values for catchments 12805001, 1310002, 1410004, 1730003, 2101001, 4533002. Error bars in precipitations and shaded areas in streamflows range from quantile 2.5 to 97.5.

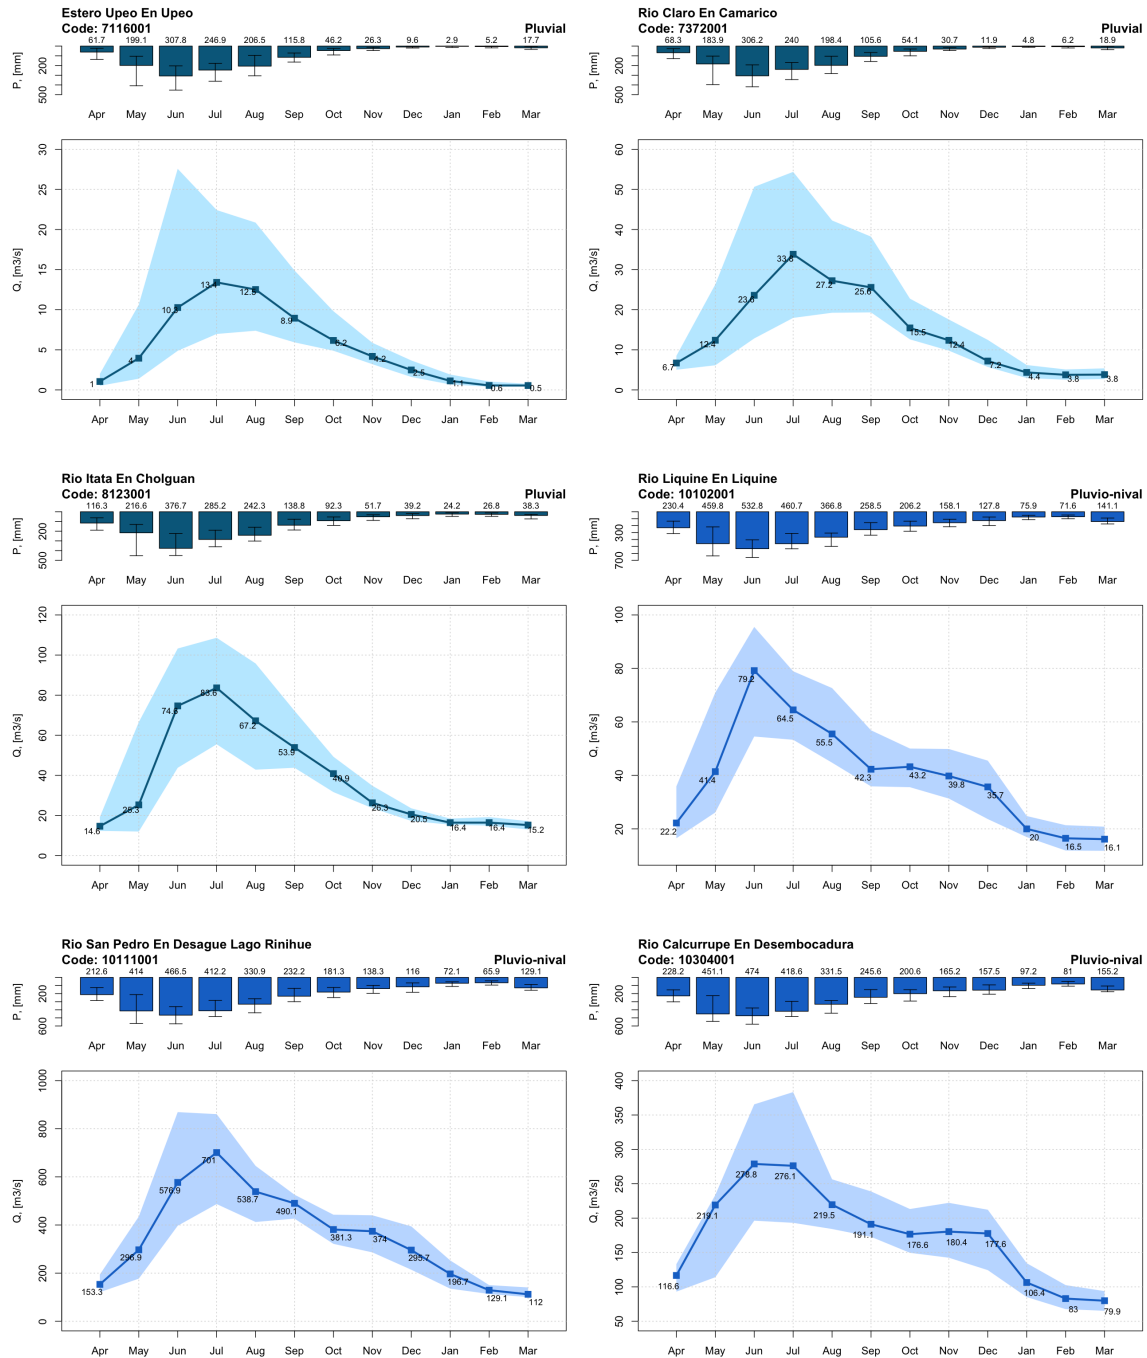

**Figure S44.** Median monthly precipitation (top panels) and streamflow (bottom panels) values for catchments 7116001, 7372001, 8123001, 10102001, 10111001, 10304001. Error bars in precipitations and shaded areas in streamflows range from quantile 2.5 to 97.5.

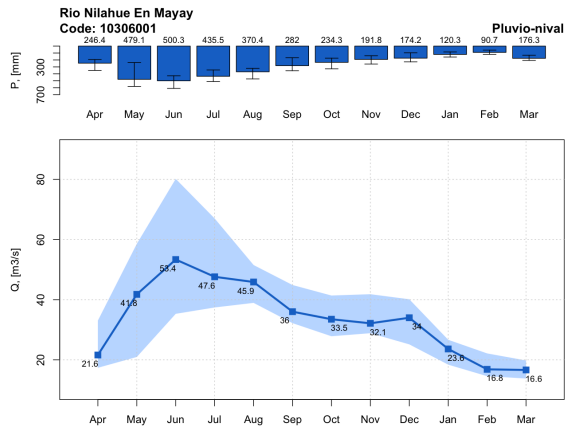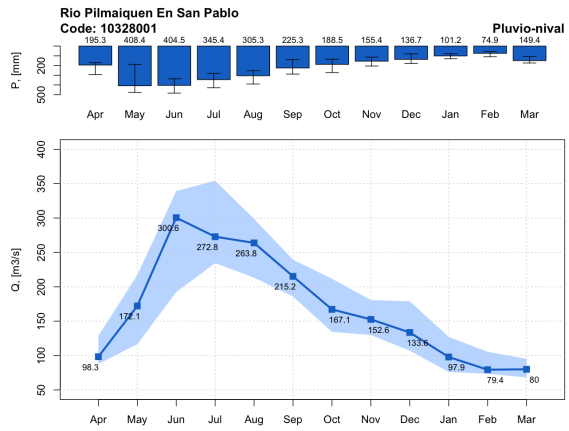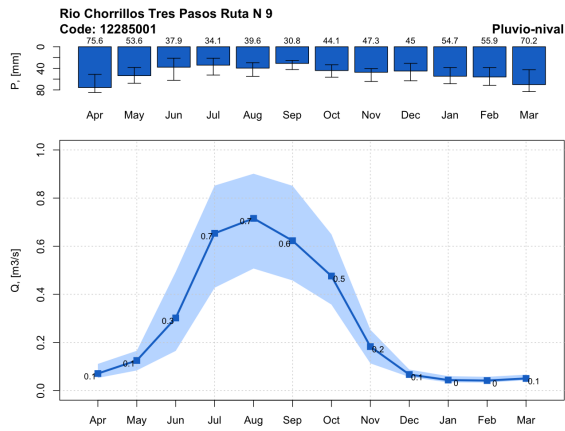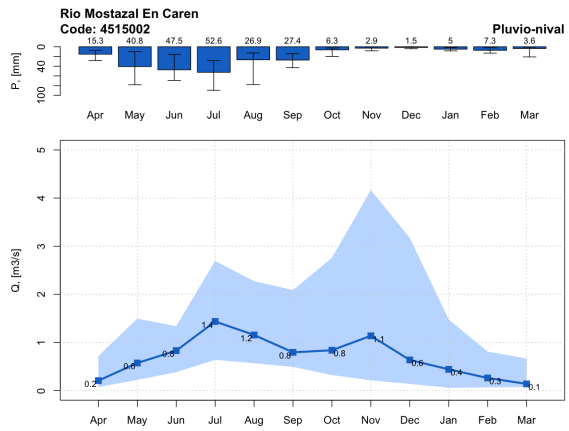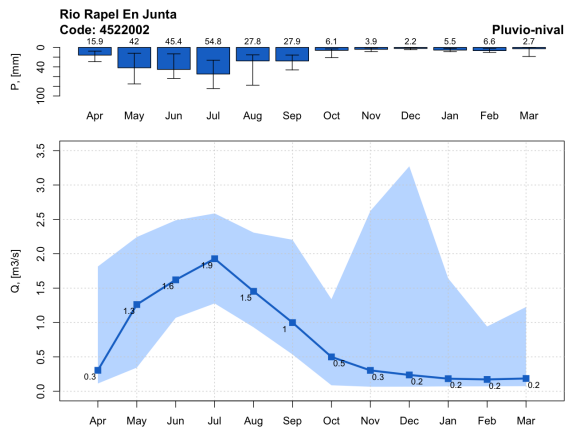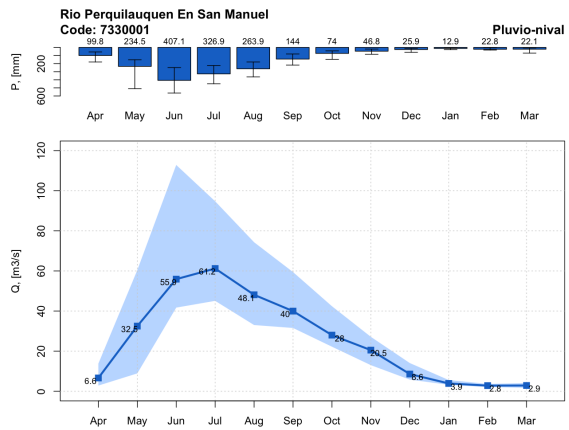

**Figure S45.** Median monthly precipitation (top panels) and streamflow (bottom panels) values for catchments 10306001, 10328001, 12285001, 4515002, 4555002, 730001. Error bars in precipitations and shaded areas in streamflows range from quantile 2.5 to 97.5.

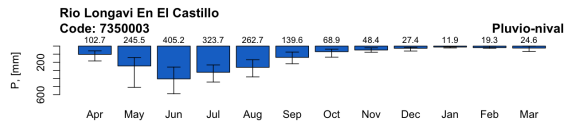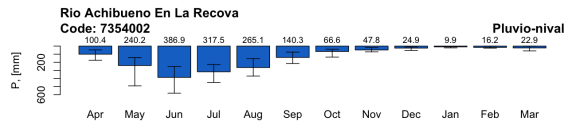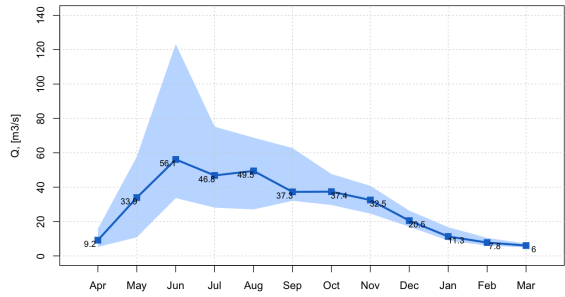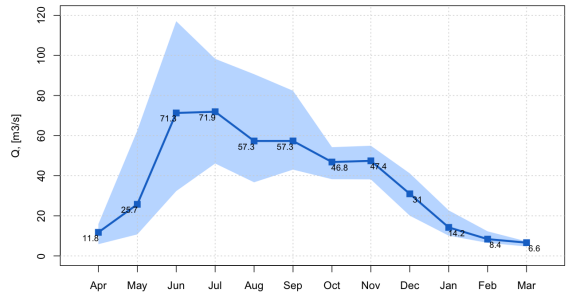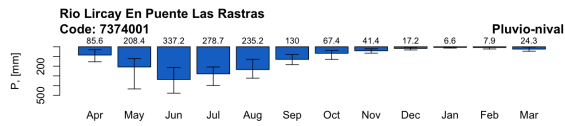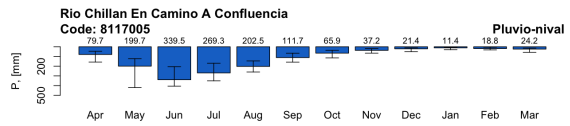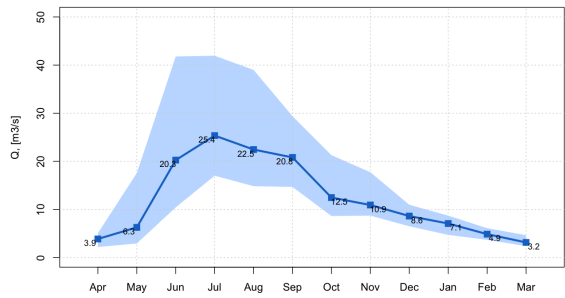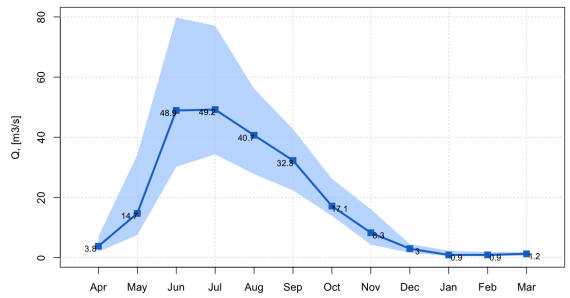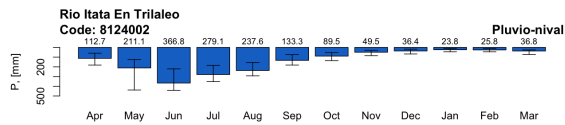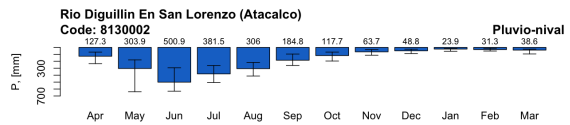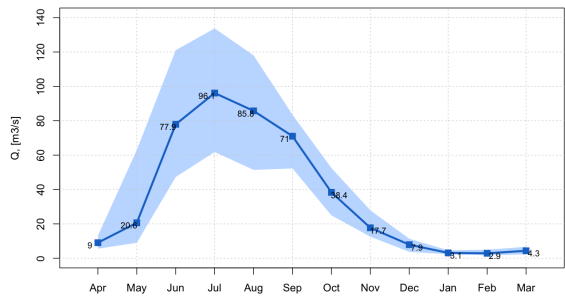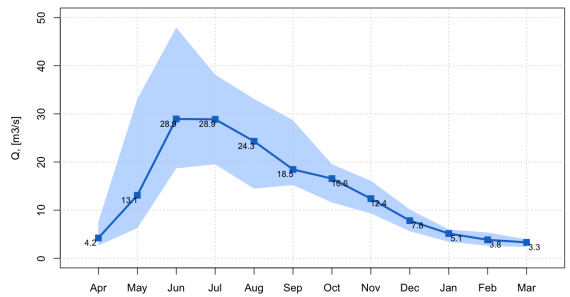

**Figure S46.** Median monthly precipitation (top panels) and streamflow (bottom panels) values for catchments 7350003, 7354002, 7374001, 8117005, 8124002, 8130002. Error bars in precipitations and shaded areas in streamflows range from quantile 2.5 to 97.5.

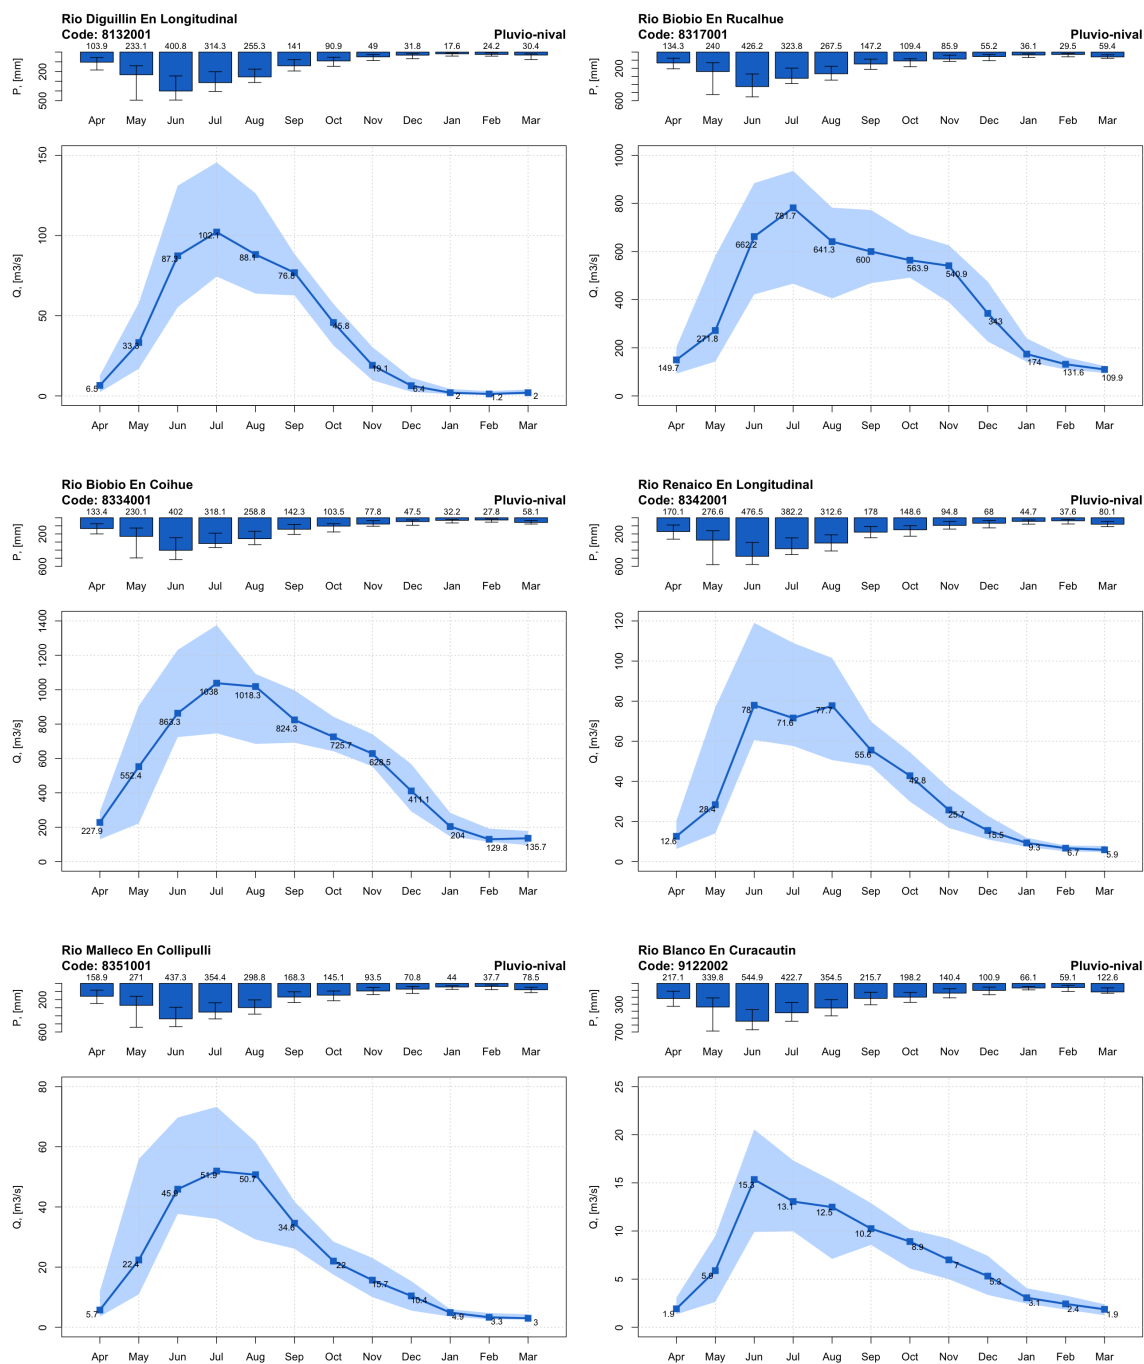

**Figure S47.** Median monthly precipitation (top panels) and streamflow (bottom panels) values for catchments 8132001, 8317001, 8334001, 8342001, 8351001, 9122002. Error bars in precipitations and shaded areas in streamflows range from quantile 2.5 to 97.5.



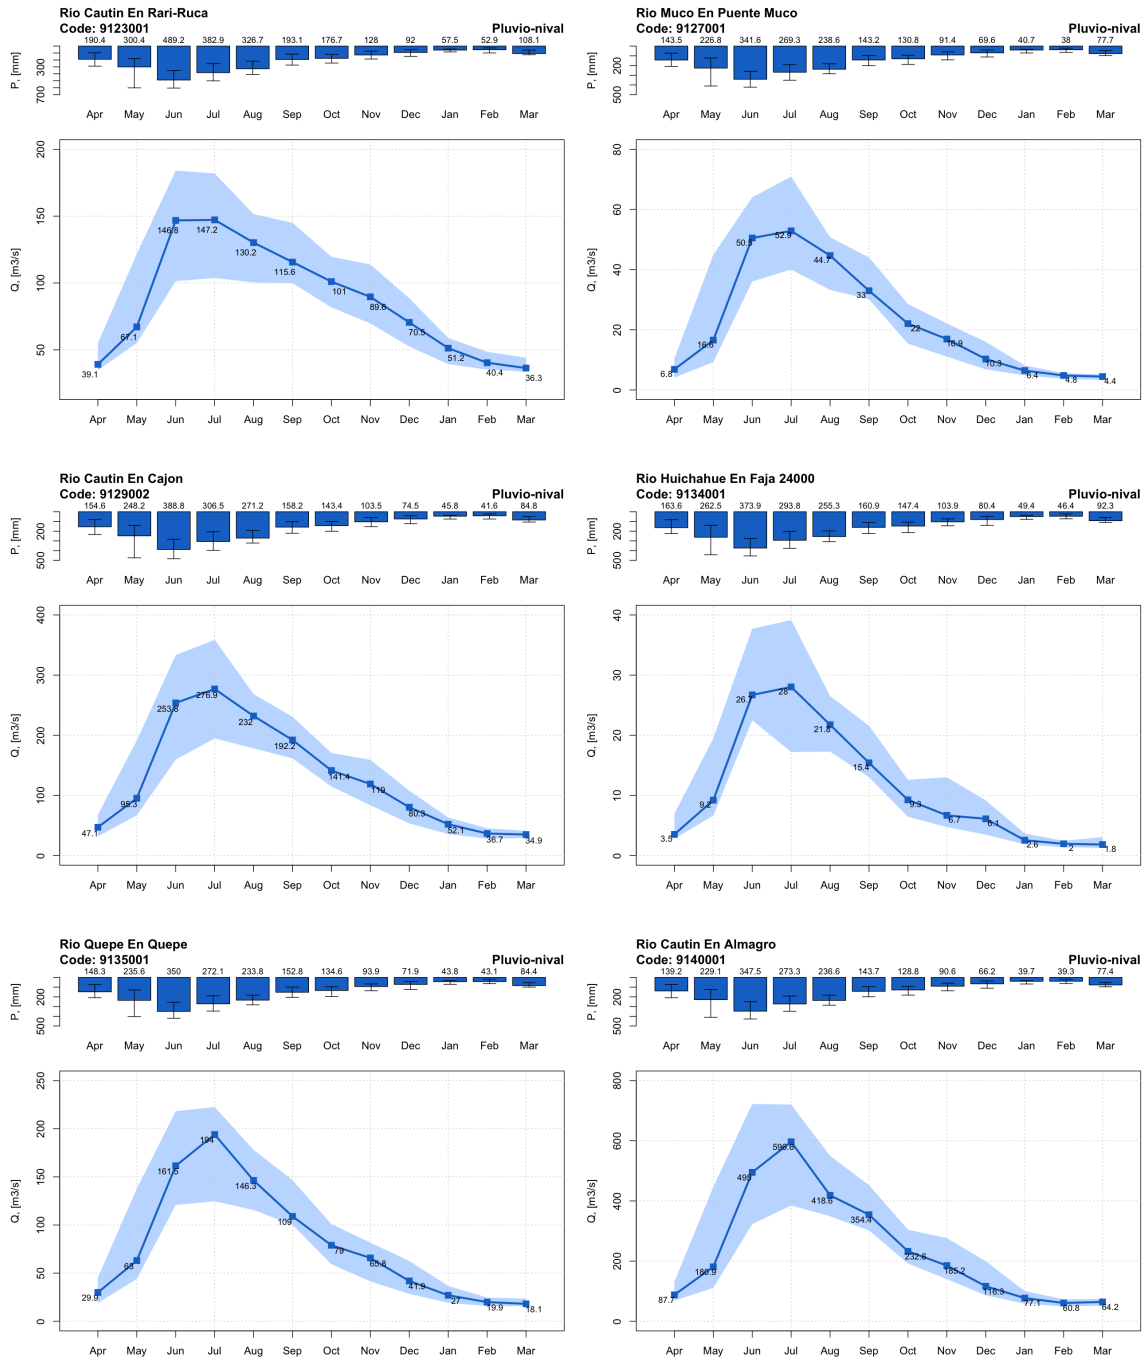

**Figure S48.** Median monthly precipitation (top panels) and streamflow (bottom panels) values for catchments 9123001, 9127001, 9129002, 9134001, 9135001, 9140001. Error bars in precipitations and shaded areas in streamflows range from quantile 2.5 to 97.5.

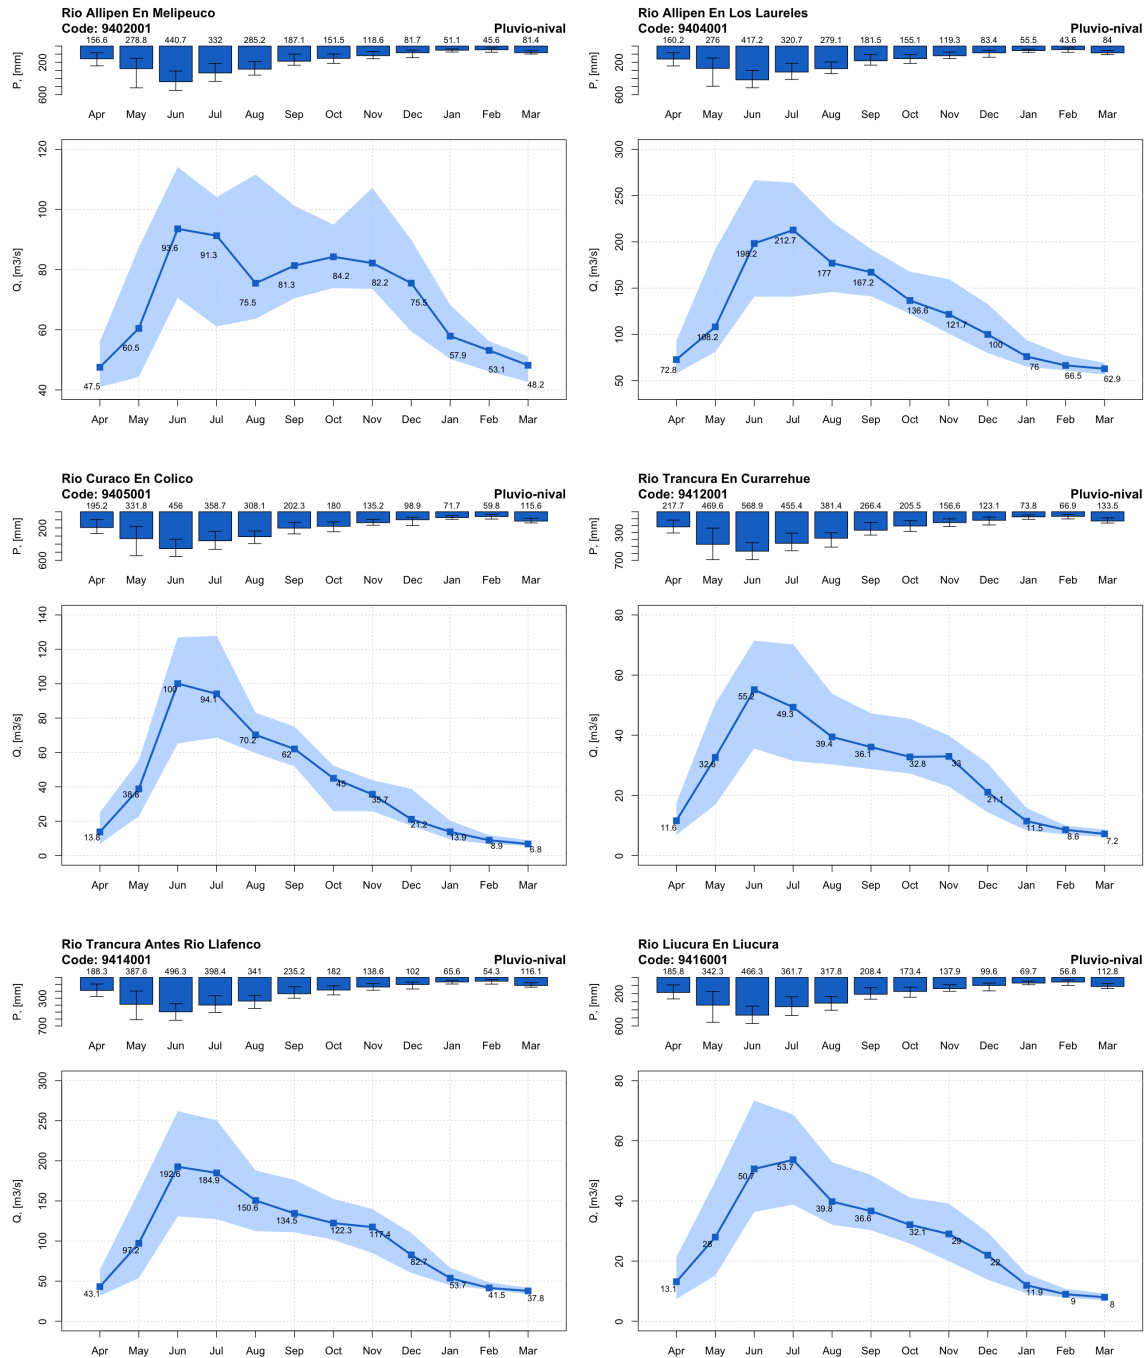

**Figure S49.** Median monthly precipitation (top panels) and streamflow (bottom panels) values for catchments 9402001, 9404001, 9405001, 9412001, 9414001, 9416001. Error bars in precipitations and shaded areas in streamflows range from quantile 2.5 to 97.5.

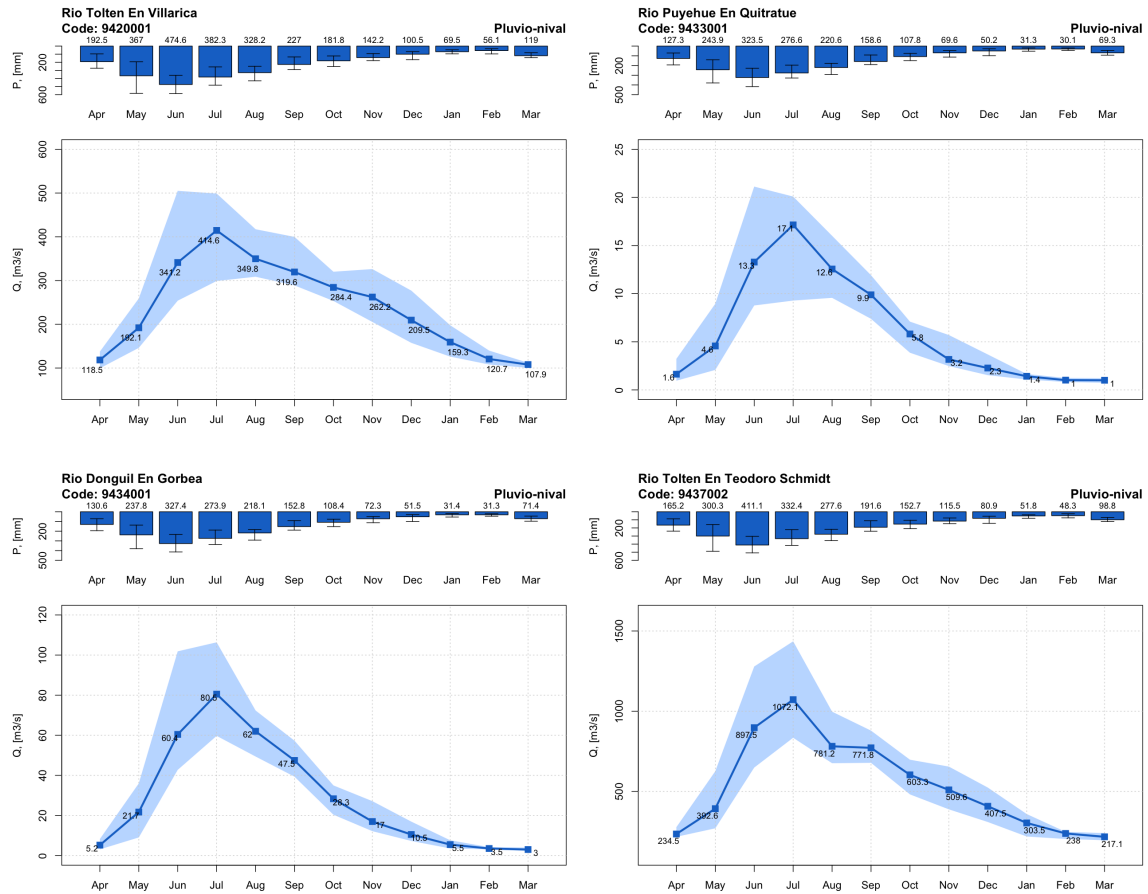

**Figure S50.** Median monthly precipitation (top panels) and streamflow (bottom panels) values for catchments 9420001, 9433001, 9434001, 9437002. Error bars in precipitations and shaded areas in streamflows range from quantile 2.5 to 97.5.

## References

- Alvarez-Garreton, C., Mendoza, P. A., Boisier, J. P., Addor, N., Galleguillos, M., Zambrano-Bigiarini, M., Lara, A., Puelma, C., Cortes, G.,  
70 Garreaud, R., McPhee, J., and Ayala, A.: The CAMELS-CL dataset: catchment attributes and meteorology for large sample studies – Chile  
dataset, *Hydrology and Earth System Sciences*, 22, 5817–5846, <https://doi.org/10.5194/hess-22-5817-2018>, 2018.
- Baez-Villanueva, O. M., Zambrano-Bigiarini, M., Mendoza, P. A., McNamara, I., Beck, H. E., Thurner, J., Nauditt, A., Ribbe, L., and Thinh,  
N. X.: On the selection of precipitation products for the regionalisation of hydrological model parameters, *Hydrology and Earth System  
Sciences*, 25, 5805–5837, 2021.
- 75 Beck, H. E., Van Dijk, A. I., Levizzani, V., Schellekens, J., Miralles, D. G., Martens, B., and Roo, A. d.: MSWEP: 3-hourly 0.25 global  
gridded precipitation (1979–2015) by merging gauge, satellite, and reanalysis data, *Hydrology and Earth System Sciences*, 21, 589–615,  
2017.
- Beck, H. E., Pan, M., Miralles, D. G., Reichle, R. H., Dorigo, W. A., Hahn, S., Sheffield, J., Karthikeyan, L., Balsamo, G., Parinussa, R. M.,  
et al.: Evaluation of 18 satellite-and model-based soil moisture products using in situ measurements from 826 sensors, *Hydrology and  
80 Earth System Sciences*, 25, 17–40, 2021.
- Carrão, H., Russo, S., Sepulcre-Canto, G., and Barbosa, P.: An empirical standardized soil moisture index for agricultural drought assessment  
from remotely sensed data, *International journal of applied earth observation and geoinformation*, 48, 74–84, 2016.
- Chan, S. K., Bindlish, R., O’Neill, P. E., Njoku, E., Jackson, T., Colliander, A., Chen, F., Burgin, M., Dunbar, S., Piepmeier, J., et al.:  
Assessment of the SMAP passive soil moisture product, *IEEE Transactions on Geoscience and Remote Sensing*, 54, 4994–5007, 2016.
- 85 Entekhabi, D., Njoku, E. G., O’Neill, P. E., Kellogg, K. H., Crow, W. T., Edelstein, W. N., Entin, J. K., Goodman, S. D., Jackson, T. J.,  
Johnson, J., et al.: The soil moisture active passive (SMAP) mission, *Proceedings of the IEEE*, 98, 704–716, 2010.
- Entekhabi, D., Yueh, S., O’Neill, P. E., Kellogg, K. H., Allen, A., Bindlish, R., Brown, M., Chan, S., Colliander, A., Crow, W. T., et al.:  
SMAP handbook–soil moisture active passive: Mapping soil moisture and freeze/thaw from space, 2014.
- Hersbach, H., Bell, B., Berrisford, P., Hirahara, S., Horányi, A., Muñoz-Sabater, J., Nicolas, J., Peubey, C., Radu, R., Schepers, D., et al.:  
90 The ERA5 global reanalysis, *Quarterly Journal of the Royal Meteorological Society*, 146, 1999–2049, 2020.
- Mohammed, P. N., Aksoy, M., Piepmeier, J. R., Johnson, J. T., and Bringer, A.: SMAP L-band microwave radiometer: RFI mitigation  
prelaunch analysis and first year on-orbit observations, *IEEE Transactions on Geoscience and Remote Sensing*, 54, 6035–6047, 2016.
- Muñoz-Sabater, J., Dutra, E., Agustí-Panareda, A., Albergel, C., Arduini, G., Balsamo, G., Boussetta, S., Choulga, M., Harrigan, S., Hers-  
bach, H., et al.: ERA5-Land: A state-of-the-art global reanalysis dataset for land applications, *Earth System Science Data*, 13, 4349–4383,  
95 2021.
- Oliva, R., Daganzo, E., Kerr, Y. H., Mecklenburg, S., Nieto, S., Richaume, P., and Gruhier, C.: SMOS radio frequency interference scenario:  
Status and actions taken to improve the RFI environment in the 1400–1427-MHz passive band, *IEEE Transactions on Geoscience and  
Remote Sensing*, 50, 1427–1439, 2012.
- O’Neill, P., Chan, S., Njoku, E., Jackson, T., Bindlish, R., and Chaubell, J.: SMAP enhanced L3 radiometer global daily 9 km EASE-grid  
100 soil moisture, version 3, NASA National Snow and Ice Data Center Distributed Active Archive Center, Boulder, Colorado USA, 2016.
- Reichle, R., De Lannoy, G., Koster, R. D., Crow, W. T., Kimball, J. S., and Liu, Q.: SMAP L4 global 3-hourly 9 km EASE-grid surface and  
root zone soil moisture geophysical data, version 4, NASA National Snow and Ice data center distributed active archive center, 10, 2018.
- Tavakol, A., Rahmani, V., Quiring, S. M., and Kumar, S. V.: Evaluation analysis of NASA SMAP L3 and L4 and SPoRT-LIS soil moisture  
data in the United States, *Remote Sensing of Environment*, 229, 234–246, 2019.
