# Supplementary material for: On the time scale of meteorological, soil moisture, and snow drought indices to assess streamflow drought over catchments with different hydrological regime: a case study using a hundred Chilean catchments
Source: Copernicus journal article supplement (doi:10.5194/egusphere-2023-1911), 2023-08-24
Supplement: Supplementary file 2 [file egusphere-2023-1911-supplement.pdf]

# 1. Selection of soil moisture and SWE products

To our knowledge, there has not been a comprehensive evaluation of soil moisture and *SWE* datasets over Chile. Therefore, we included four different soil moisture datasets to calculate the ESSMI and two to calculate the SWEI to account for their uncertainty. Specifically, we used ERA5 (Hersbach et al., 2020), ERA5-Land (Muñoz-Sabater et al., 2021), SMAP-L3E (O’Neill et al., 2016), and SMAP-L4SM (Reichle et al., 2018) to compute the ESSMI at different scales (1, 3, 6, and 12 months) and ERA5 and ERA5-Land to compute the SWEI (at 1, 3, and 6 months).

ERA5 (Hersbach et al., 2020) is an hourly reanalysis product that provides estimates of *P*, soil moisture at different depths (0–7, 7–28, 28–100, and 100–289 cm), and *SWE*, as well as other variables, from 1940 to the present with a spatial resolution of 0.25°. This product has a better representation of rain and snow than its predecessor, ERA-Interim, with a more realistic parameterisation of microphysics and mixed-phase clouds (Hersbach et al., 2020). Although ERA5 has a relatively coarse spatial resolution compared to other products, we included it in the analysis because reanalysis products tend to outperform purely observational datasets in high latitudes (Beck et al., 2017; Baez-Villanueva et al., 2021). The soil moisture depth used in this study is 0–7 cm for consistency with the other soil moisture products.

The National Aeronautics and Space Administration (NASA) Soil Moisture Active Passive (SMAP) mission originally aimed to provide global measurements of soil moisture and freeze/thaw state using an L-band (active) radar and an L-band (passive) radiometer (Entekhabi et al., 2010). After the failure of the radar in early 2015, the radiometer remained as the only on-board sensor providing measurements (Chan et al., 2016). The SMAP mission incorporated radio frequency interference detection and mitigation to provide more continuous high-quality estimates of soil moisture (Oliva et al., 2012; Mohammed et al., 2016). The observed radiometric brightness *T* comes from the land surface L-band emission, and is thus determined by the physical *T* and dielectric constant of the respective scene, which is related to soil moisture in the top ~5 cm surface soil moisture (Entekhabi et al., 2014).

The enhanced level-3 SMAP soil moisture product (SMAP-L3E; Entekhabi et al., 2010; O’Neill et al., 2016) provides global daily estimates of soil moisture derived from the SMAP level-1C interpolated brightness *T* with a 2–3 day average revisiting time. The SMAP level-4 soil moisture product (SMAP-L4SM; Entekhabi et al., 2010; Reichle et al., 2018) assimilates brightness *T* observations into the Goddard Earth Observing System (GEOS) Catchment land surface model. It has been validated against numerous ground-based measurements (Tavakol et al., 2019; Beck et al., 2021) and provides global 3-hourly volumetric soil moisture estimates of the top 5 cm.

To select a specific soil moisture and *SWE* product, we performed a simple correlation analysis between these indices at their respective temporal scales and the SSI-1. The selection of the products (one for each variable) was made considering the highest correlation and longest time series of the products, as we aim to assess the ability of these indices to serve as a proxy for streamflow droughts. The selection of these products was based on the assumption that the product with the highest correlation with the SSI-1 represents better the spatio-temporal patterns of each variable across Chile. This assumption is not too far from reality since *i*) a correlation between different components of the water cycle at the monthly scale could indicate agreement

between the gridded products and in-situ  $Q$  data, and *ii*) any systematic bias that the products may present do not affect the computation of the standardised drought indices.

Table S1 shows the cross-correlation values for all indices and the SSI-1. For the case of soil moisture, SMAP-L4SM has slightly better overall median cross-correlation values between ESSMI and SSI-1 (0.51), while ERA5 and ERA5 Land closely follow SMAP-L4SM (both products with a value of 0.50). However, ERA5 Land was selected as the best soil moisture product to compute the ESSMI drought index because *i*) SMAP-L4SM is only available from 2015, which is much less than the 32 years of record of ERA5-Land (although its evaluation starts in 1983) instead of gaining 0.01 in the cross-correlation evaluation, and *ii*) although ERA5 performed similarly to ERA5-Land, the latter has a higher spatial resolution.

In the case of SWEI, ERA5-Land was selected because it had the highest overall cross-correlation values compared to ERA5, and was therefore used to calculate the ESSMI and SWEI in the manuscript. Although Muñoz-Sabater et al. (2021) found mixed performance of ERA5 Land related to  $SWE$  for some geographical locations and altitudes of the world, the product presents coherent  $SWE$  fields over continental Chile, which are very similar to those of ERA5.

**Table S1.** Median correlation values between the ESSMI and SWEI, and the SSI-1 over the 100 near-natural catchments presented in Figure 1 of the manuscript for 1979–2020.

| Index | Product   | Pearson's correlation coefficient                               |
|-------|-----------|-----------------------------------------------------------------|
| ESSMI | ERA5      | Scale 1 (0.50); Scale 3 (0.49); Scale 6 (0.42); Scale 12 (0.30) |
|       | ERA5-Land | Scale 1 (0.50); Scale 3 (0.47); Scale 6 (0.42); Scale 12 (0.29) |
|       | SMAP-L3E  | Scale 1 (0.34); Scale 3 (0.36); Scale 6 (0.26); Scale 12 (0.17) |
|       | SMAP-L4SM | Scale 1 (0.51); Scale 3 (0.39); Scale 6 (0.27); Scale 12 (0.07) |
| SWEI  | ERA5      | Scale 1 (0.20); Scale 3 (0.21); Scale 6 (0.24)                  |
|       | ERA5-Land | Scale 1 (0.23); Scale 3 (0.21); Scale 6 (0.22)                  |

## 2. Conceptual figure of hydrological regimes

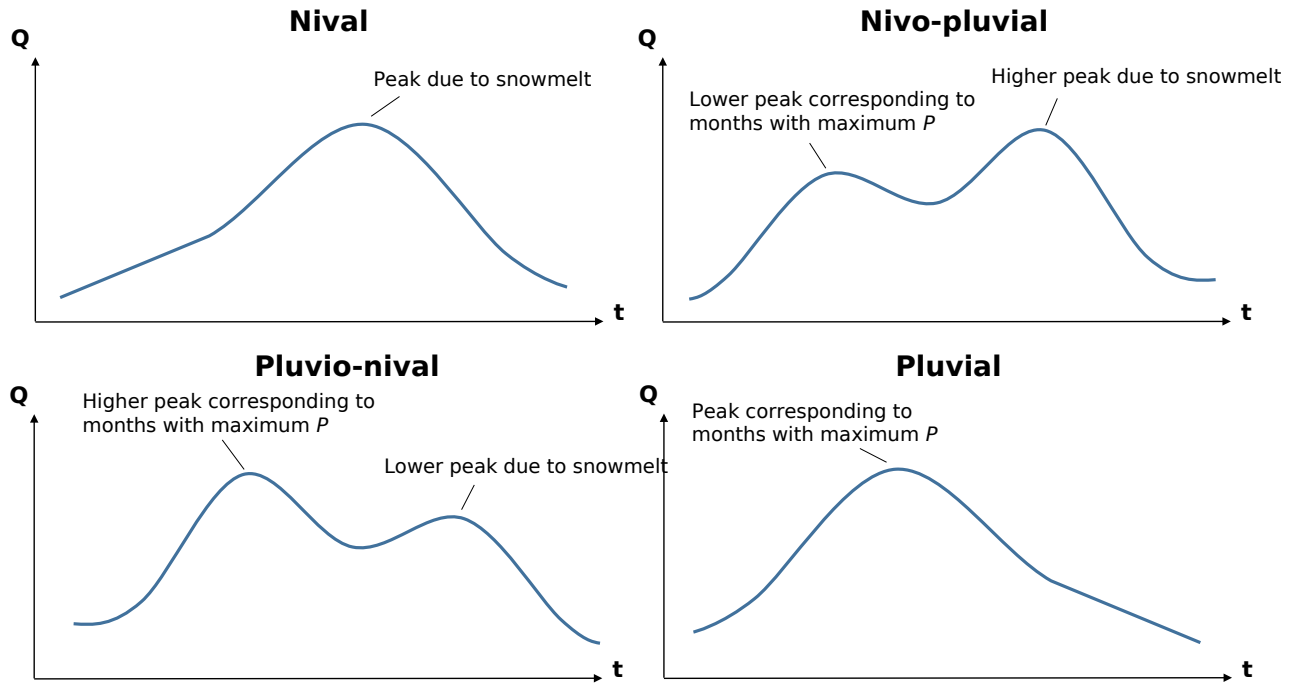

**Figure S1.** Conceptual illustration of the hydrological regimes used to classify the 100 near-natural catchments used in this study extracted from Baez-Villanueva et al. (2021).

### 3. Summary of scales with highest cross-correlation and event coincidence rates

**Table S2.** Median correlation (lag zero) and event coincidence rates for the selected indices and temporal scales with the highest values when calculated over 100 near-natural Chilean catchments.

| Index | Temporal scale | Cross-correlation | Event coincidence |             |
|-------|----------------|-------------------|-------------------|-------------|
|       |                |                   | thr=-1.0          | thr=-1.5    |
| SPI   | 3              | 0.57              | 0.52              |             |
|       | 6              | <b>0.58</b>       | <b>0.53</b>       | <b>0.46</b> |
|       | 9              | 0.57              | 0.50              | 0.45        |
| SPEI  | 3              | 0.52              | 0.50              |             |
|       | 6              | <b>0.52</b>       | <b>0.51</b>       | 0.41        |
|       | 9              |                   | 0.50              | 0.40        |
| ESSMI | 1              | <b>0.50</b>       | 0.27              |             |
|       | 3              | 0.47              | <b>0.31</b>       | 0.18        |
|       | 6              |                   | 0.29              | <b>0.21</b> |
| SWEI  | 1              | <b>0.23</b>       | 0.27              |             |
|       | 3              |                   | <b>0.29</b>       | <b>0.10</b> |
|       | 6              | 0.22              | 0.29              | 0.08        |

**Table S3.** Temporal scale with the highest median correlation values (lag zero) for SPI, SPEI, ESSMI and SWEI calculated over 100 near-natural Chilean catchments. The number presented in parenthesis indicates the numeric value of the linear cross-correlation at the given temporal scale.

|       | Nival            | Nivo-pluvial     | Pluvio-Nival    | Pluvial         |
|-------|------------------|------------------|-----------------|-----------------|
| SPI   | <b>12</b> (0.75) | <b>12</b> (0.52) | <b>3</b> (0.73) | <b>3</b> (0.66) |
|       | 18 (0.75)        | 6 (0.51)         | 6 (0.79)        | 1 (0.53)        |
|       | 24 (0.73)        | 3 (0.51)         |                 |                 |
|       |                  | 9 (0.48)         |                 |                 |
| SPEI  | 12 (0.58)        | <b>3</b> (0.48)  | <b>3</b> (0.68) | <b>3</b> (0.63) |
|       | <b>18</b> (0.60) | 6 (0.43)         | 1 (0.67)        | 1 (0.55)        |
|       | 24 (0.59)        | 12 (0.43)        | 6 (0.66)        |                 |
|       |                  | 1 (0.38)         |                 |                 |
| ESSMI |                  | 9 (0.36)         |                 |                 |
|       | <b>6</b> (0.53)  | <b>3</b> (0.49)  | <b>1</b> (0.55) | <b>1</b> (0.52) |
|       | 3 (0.48)         | 1 (0.48)         | 3 (0.50)        |                 |
| SWEI  | 1 (0.38)         |                  |                 |                 |
|       | <b>1</b> (0.38)  | <b>1</b> (0.25)  | <b>1</b> (0.25) | <b>3</b> (0.10) |



**Table S4.** Temporal scale with the highest median precursory coincidence rates for SPI, SPEI, ESSMI and SWEI calculated over 100 near-natural Chilean catchments. Numbers in parentheses indicate the numeric value of the precursory coincidence rate at the given temporal scale. This table corresponds to moderate drought events ( $thr = -1.0$ ).

|       | <b>Nival</b>     | <b>Nivo-pluvial</b> | <b>Pluvio-Nival</b> | <b>Pluvial</b>  |
|-------|------------------|---------------------|---------------------|-----------------|
| SPEI  | <b>24</b> (0.74) | 6 (0.48)            | <b>6</b> (0.68)     | <b>3</b> (0.55) |
|       | 18 (0.68)        | 9 (0.47)            |                     |                 |
|       |                  | 12 (0.46)           |                     |                 |
| SPEI  | <b>18</b> (0.52) | <b>9</b> (0.50)     | <b>3</b> (0.60)     | <b>3</b> (0.49) |
|       |                  | 6 (0.49)            | 1 (0.55)            |                 |
|       |                  | 12 (0.45)           |                     |                 |
| ESSMI | <b>1</b> (0.23)  | <b>1</b> (0.26)     | <b>3</b> (0.37)     | <b>6</b> (0.38) |
|       | 3 (0.22)         |                     |                     | 3 (0.37)        |
| SWEI  | -                | -                   | -                   | -               |

**Table S5.** Temporal scale with the highest median precursory coincidence rates for SPI, SPEI, ESSMI and SWEI calculated over 100 near-natural Chilean catchments. Numbers in parentheses indicate the numeric value of the precursory coincidence rate at the given temporal scale. This table corresponds to severe drought events ( $thr = -1.5$ ).

|       | <b>Nival</b>     | <b>Nivo-pluvial</b> | <b>Pluvio-Nival</b> | <b>Pluvial</b>   |
|-------|------------------|---------------------|---------------------|------------------|
| SPEI  | <b>24</b> (0.66) | <b>6</b> (0.32)     | <b>6</b> (0.73)     | -                |
|       |                  | 9 (0.31)            |                     |                  |
|       |                  | 3 (0.31)            |                     |                  |
| SPEI  | <b>12</b> (0.25) | <b>6</b> (0.32)     | <b>6</b> (0.48)     | <b>12</b> (0.30) |
|       |                  | 9 (0.31)            | 3 (0.47)            |                  |
|       |                  | 12 (0.30)           |                     |                  |
| ESSMI | -                | -                   | <b>6</b> (0.25)     | <b>1</b> (0.23)  |
|       |                  |                     | 3 (0.23)            | 3 (0.22)         |
| SWEI  | -                | -                   | -                   | -                |

### **3 All catchments — Boxplots for different temporal scales and lag times**

# 3.1 Cross-correlation

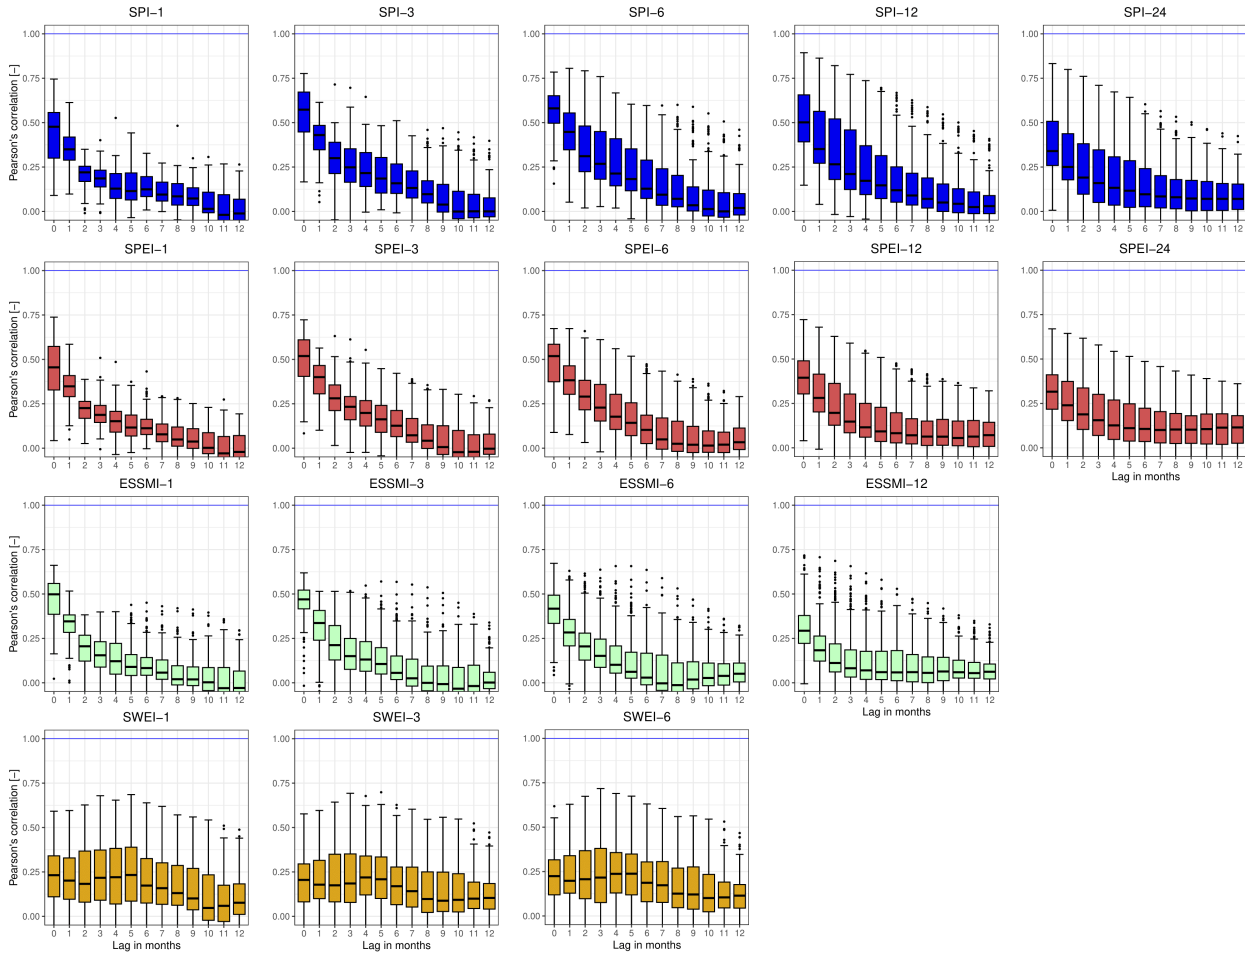

**Figure S2.** cross-correlation among the selected drought indices (SPI, SPEI, ESSMI, SWEI) and the SSI-1, for different temporal scales (from 1 to 24 months) and lag times (from 0 to 12 months). The solid coloured boxplots indicate lags where at least 75% of the catchments presented significant results at the 95% confidence interval, while the white boxplots indicate the opposite. The blue line indicates the optimal cross-correlation. The solid line within each box represents the median value, the edges of the boxes represent the first and third quartiles, and the whiskers extend to the most extreme data point which is no more than 1.5 times the interquartile range from the box.

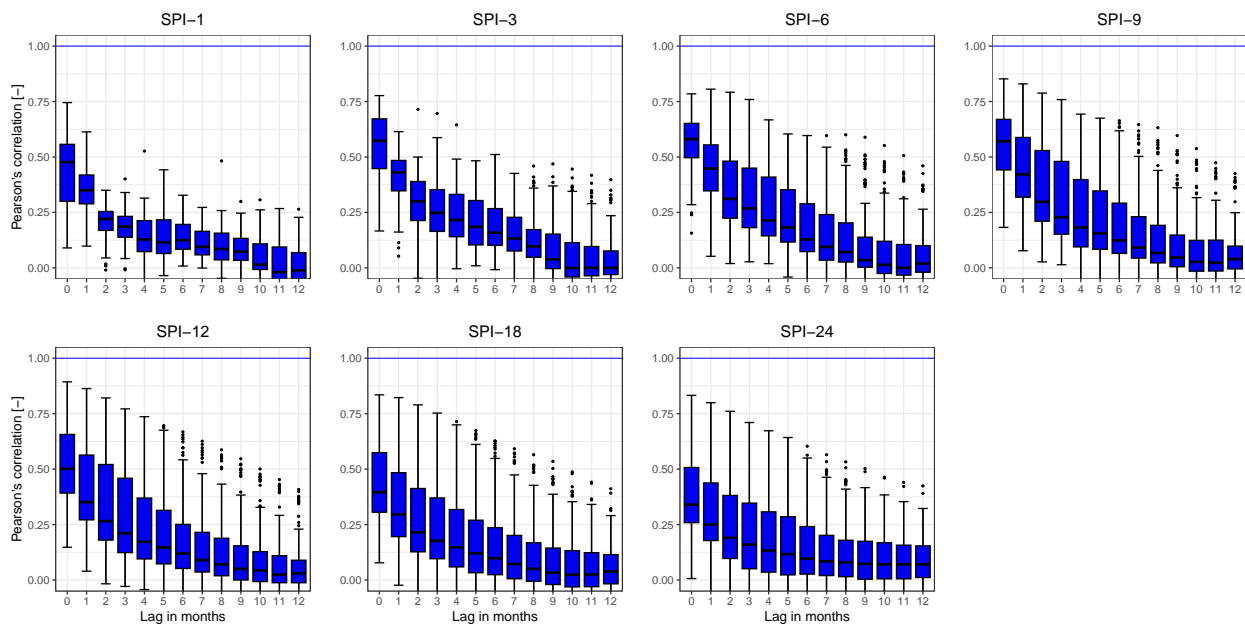

**Figure S3.** cross-correlation results between the SPI and the SSI-1 at different lag periods (ranging from 0 to 12 months). The blue line indicates the optimal cross-correlation. The solid line within each box represents the median value, the edges of the boxes represent the first and third quartiles, and the whiskers extend to the most extreme data point which is no more than 1.5 times the interquartile range from the box.

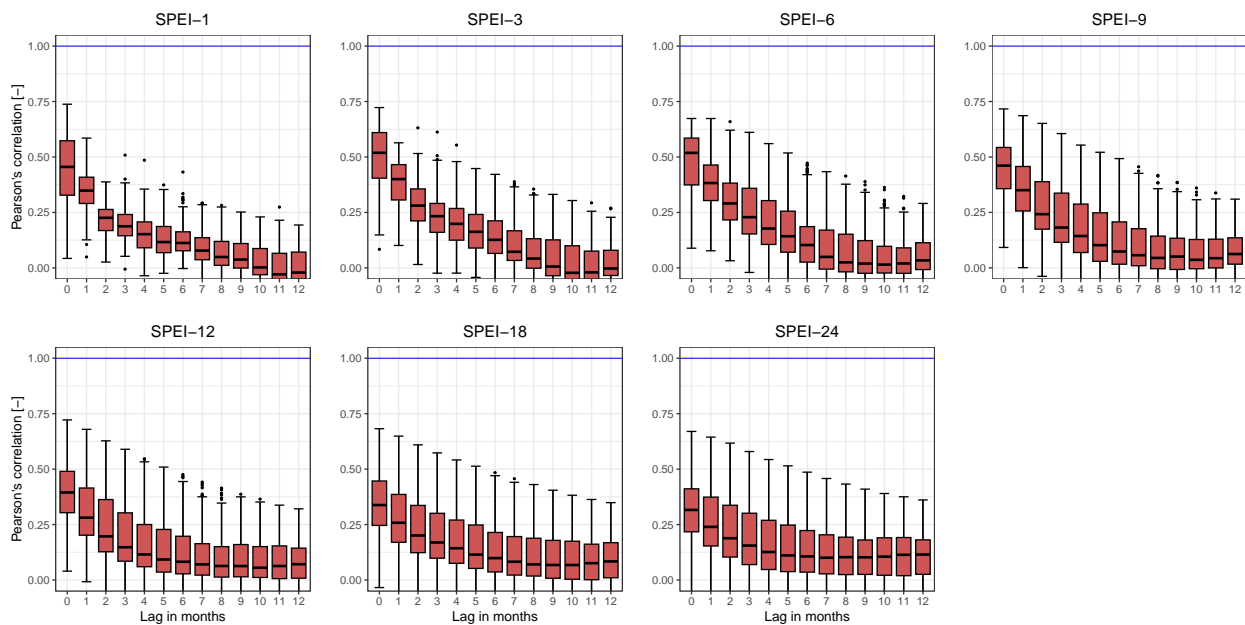

**Figure S4.** cross-correlation results between the SPEI and the SSI-1 at different lag periods (ranging from 0 to 12 months). The blue line indicates the optimal cross-correlation. The solid line within each box represents the median value, the edges of the boxes represent the first and third quartiles, and the whiskers extend to the most extreme data point which is no more than 1.5 times the interquartile range from the box.

## 3.2 Event coincidence analysis

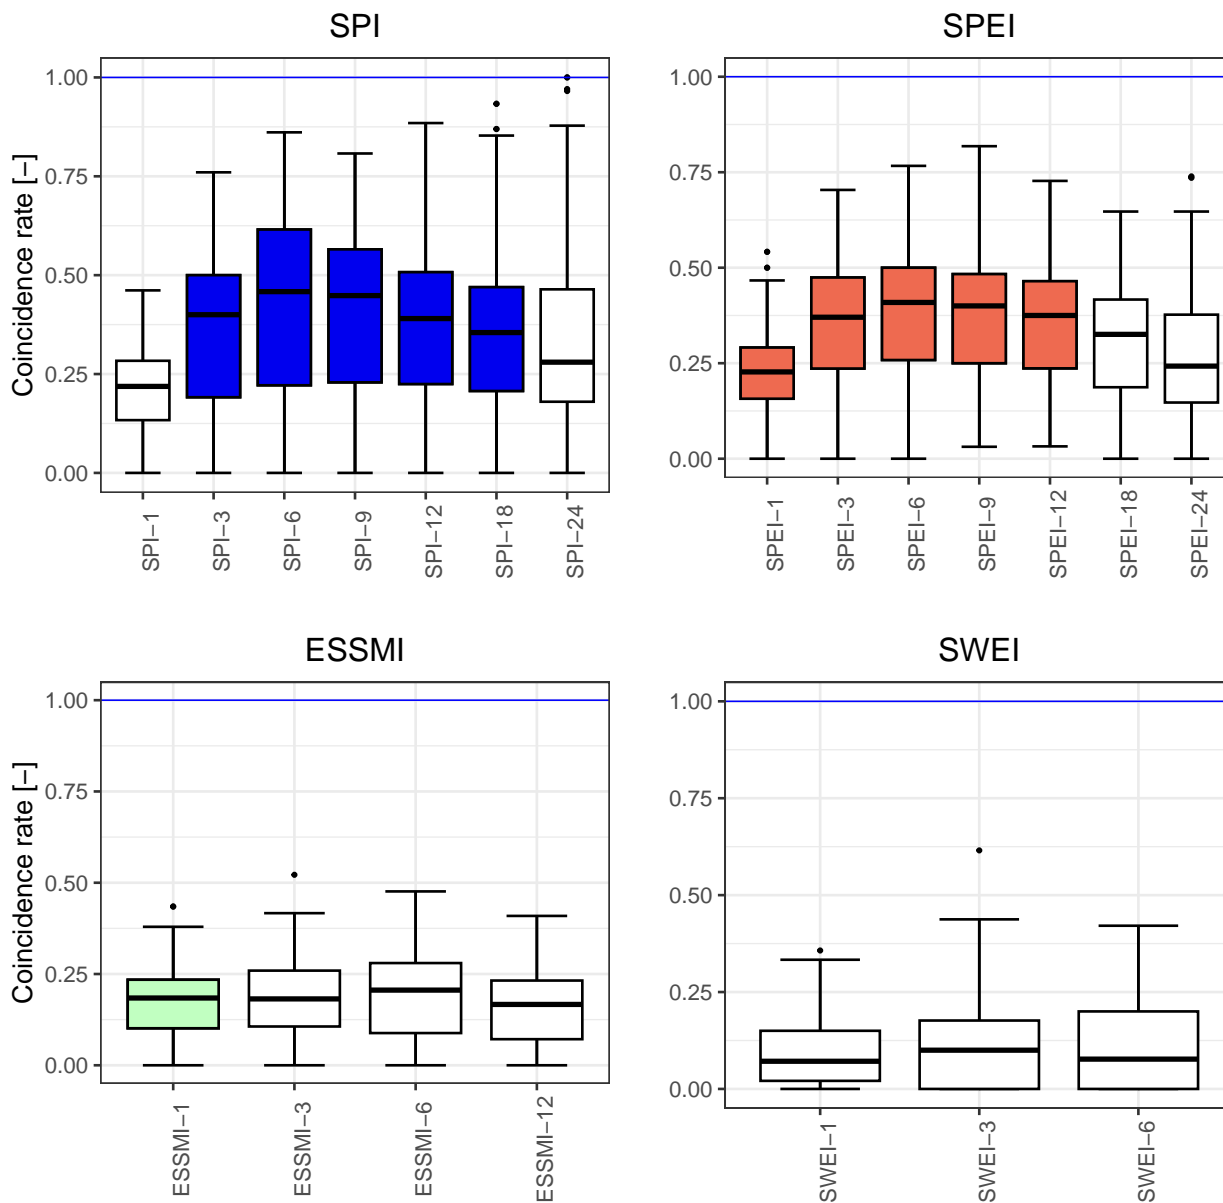

**Figure S5.** Event coincidence analysis results of the selected drought indices and the SSI-1 at a lag of zero months for severe droughts ( $thr = -1.5$ ). The coloured boxplots indicate lags where at least 75% of the catchments presented significant results at the 95% confidence interval, while the white boxplots indicate the opposite. The blue line indicates the optimal cross-correlation. The solid line within each box represents the median value, the edges of the boxes represent the first and third quartiles, and the whiskers extend to the most extreme data point which is no more than 1.5 times the interquartile range from the box.

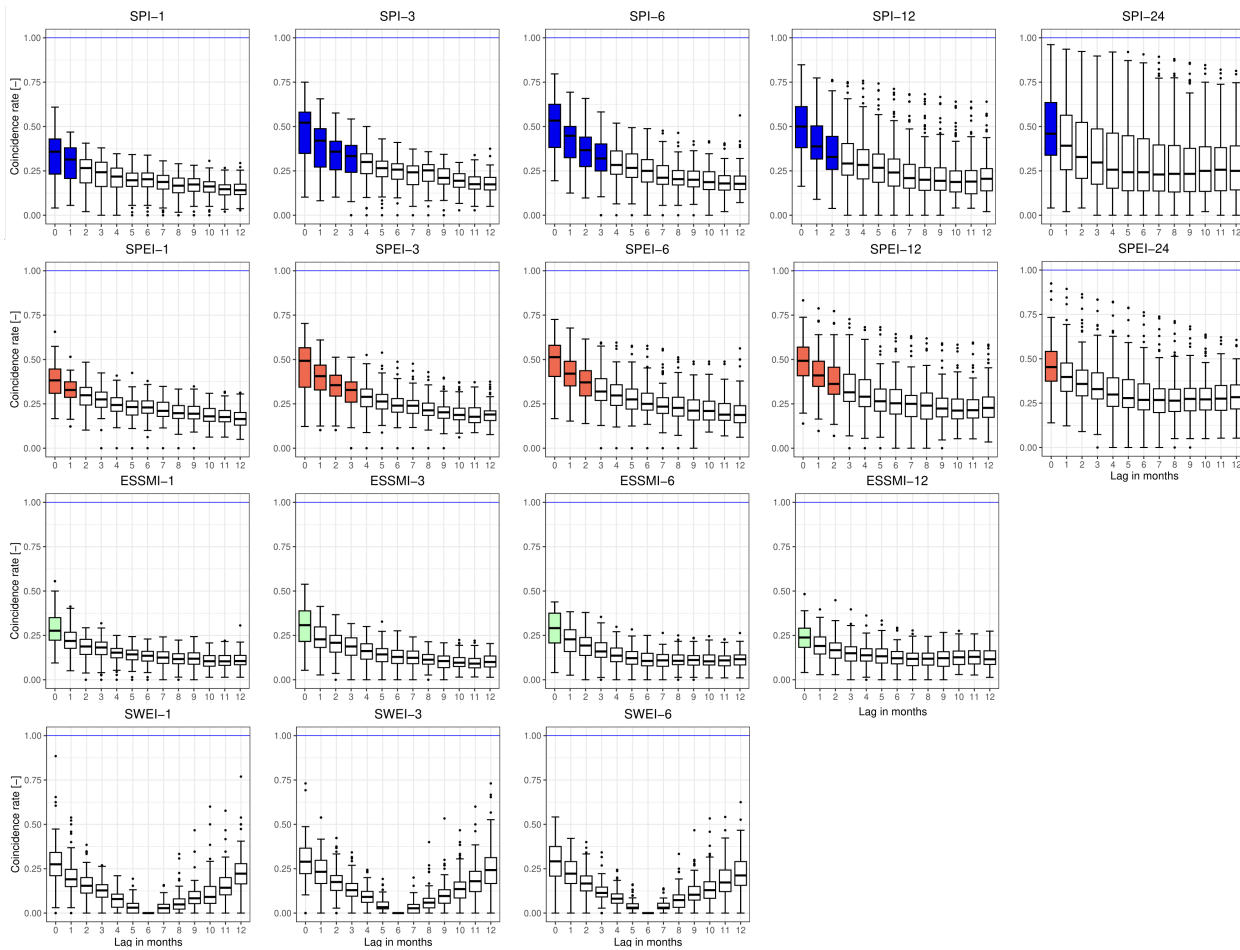

**Figure S6.** Event coincidence analysis results of the selected drought indices and the SSI-1 at different lag periods (ranging from 0 to 12 months) for a threshold of -1.0 (moderate droughts). The solid coloured boxplots indicate those lags where at least 75% of the catchments presented significant results at the 95% confidence interval, while the white boxplots indicate the opposite. The blue line indicates the optimal cross-correlation. The solid line within each box represents the median value, the edges of the boxes represent the first and third quartiles, and the whiskers extend to the most extreme data point which is no more than 1.5 times the interquartile range from the box.



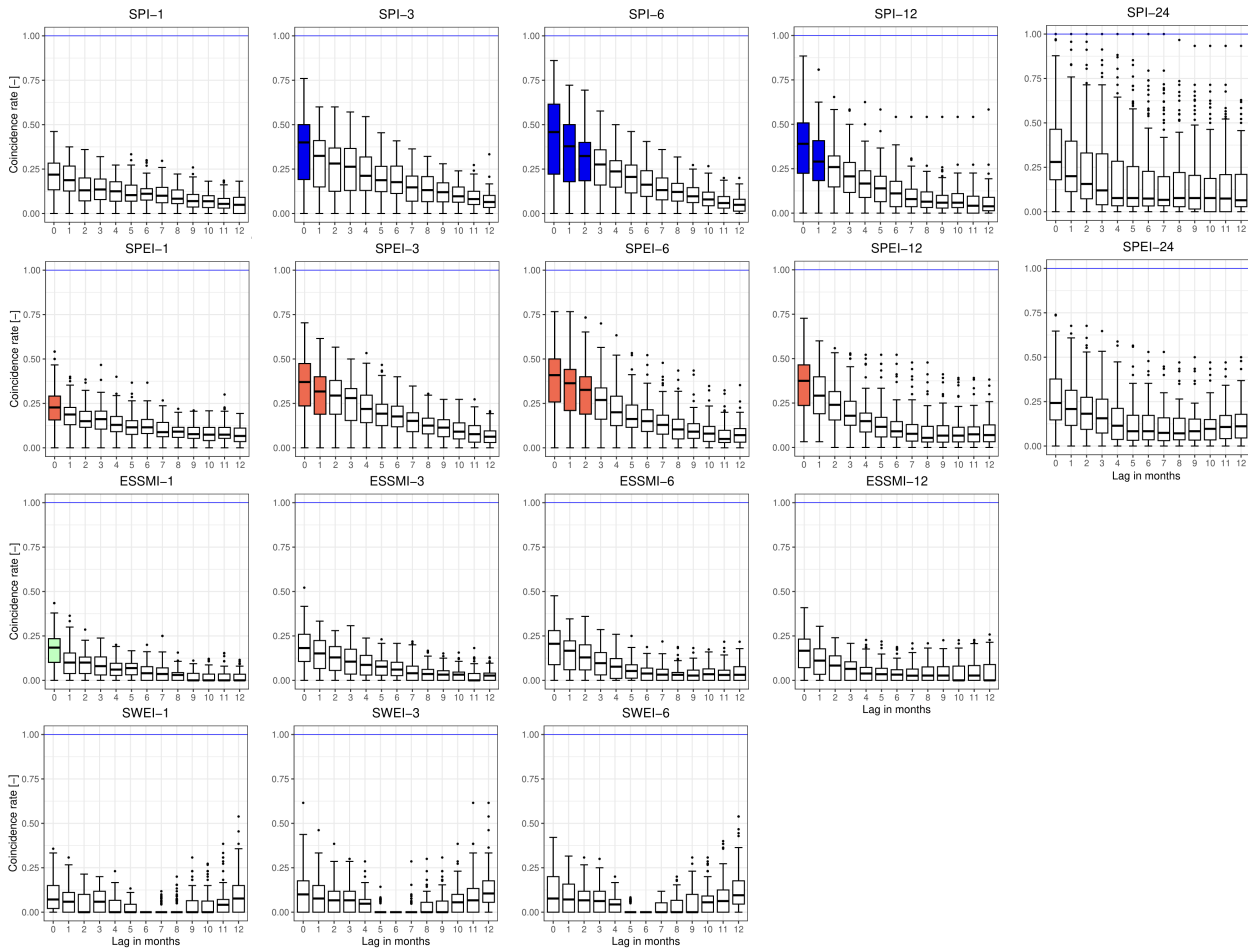

**Figure S7.** Event coincidence analysis results of the selected drought indices and the SSI-1 at different lag periods (ranging from 0 to 12 months) for a threshold of -1.5 (severe droughts). The solid coloured boxplots indicate those lags where at least 75% of the catchments presented significant results at the 95% confidence interval, while the white boxplots indicate the opposite. The blue line indicates the optimal cross-correlation. The solid line within each box represents the median value, the edges of the boxes represent the first and third quartiles, and the whiskers extend to the most extreme data point which is no more than 1.5 times the interquartile range from the box.

## **4 All catchments — Spatial analysis for different temporal scales and lag times**

## 4.1 Cross-correlation

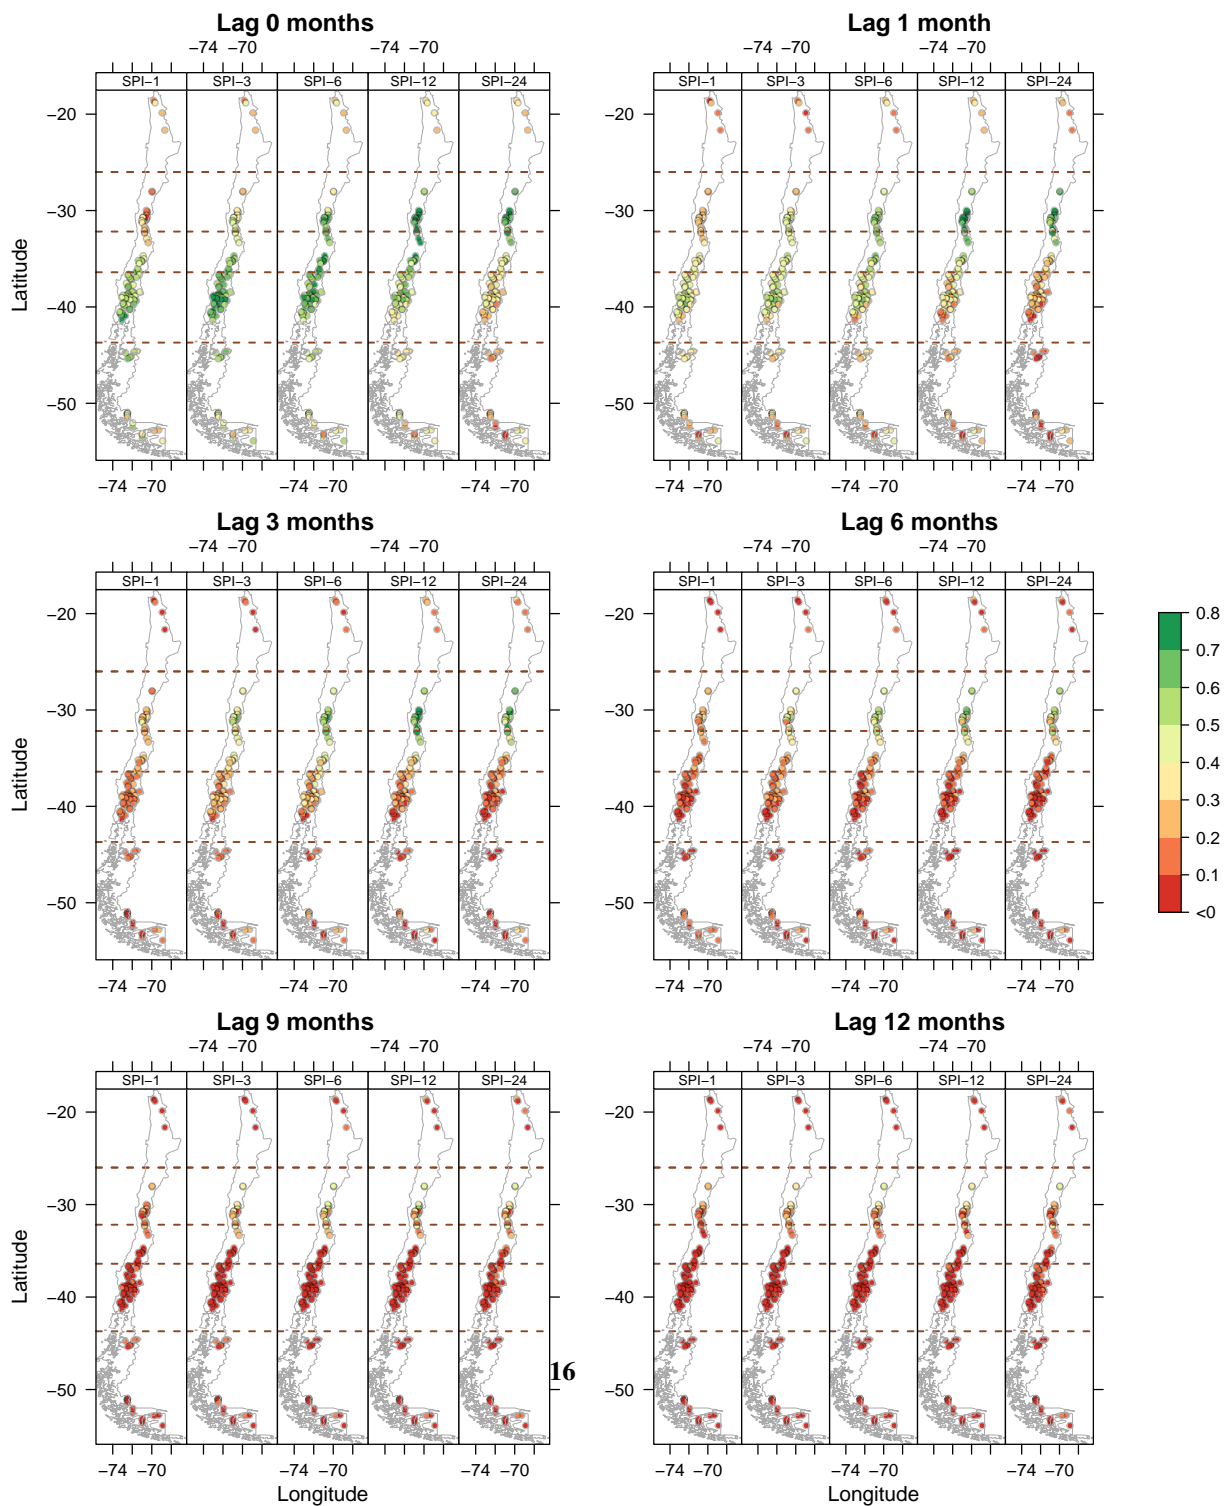

**Figure S8.** Spatial distribution of the cross-correlation results between the SPI at different scales and the SSI-1 over 100 near-natural catchments at different lags (0, 1, 3, 6, 9, and 12 months).

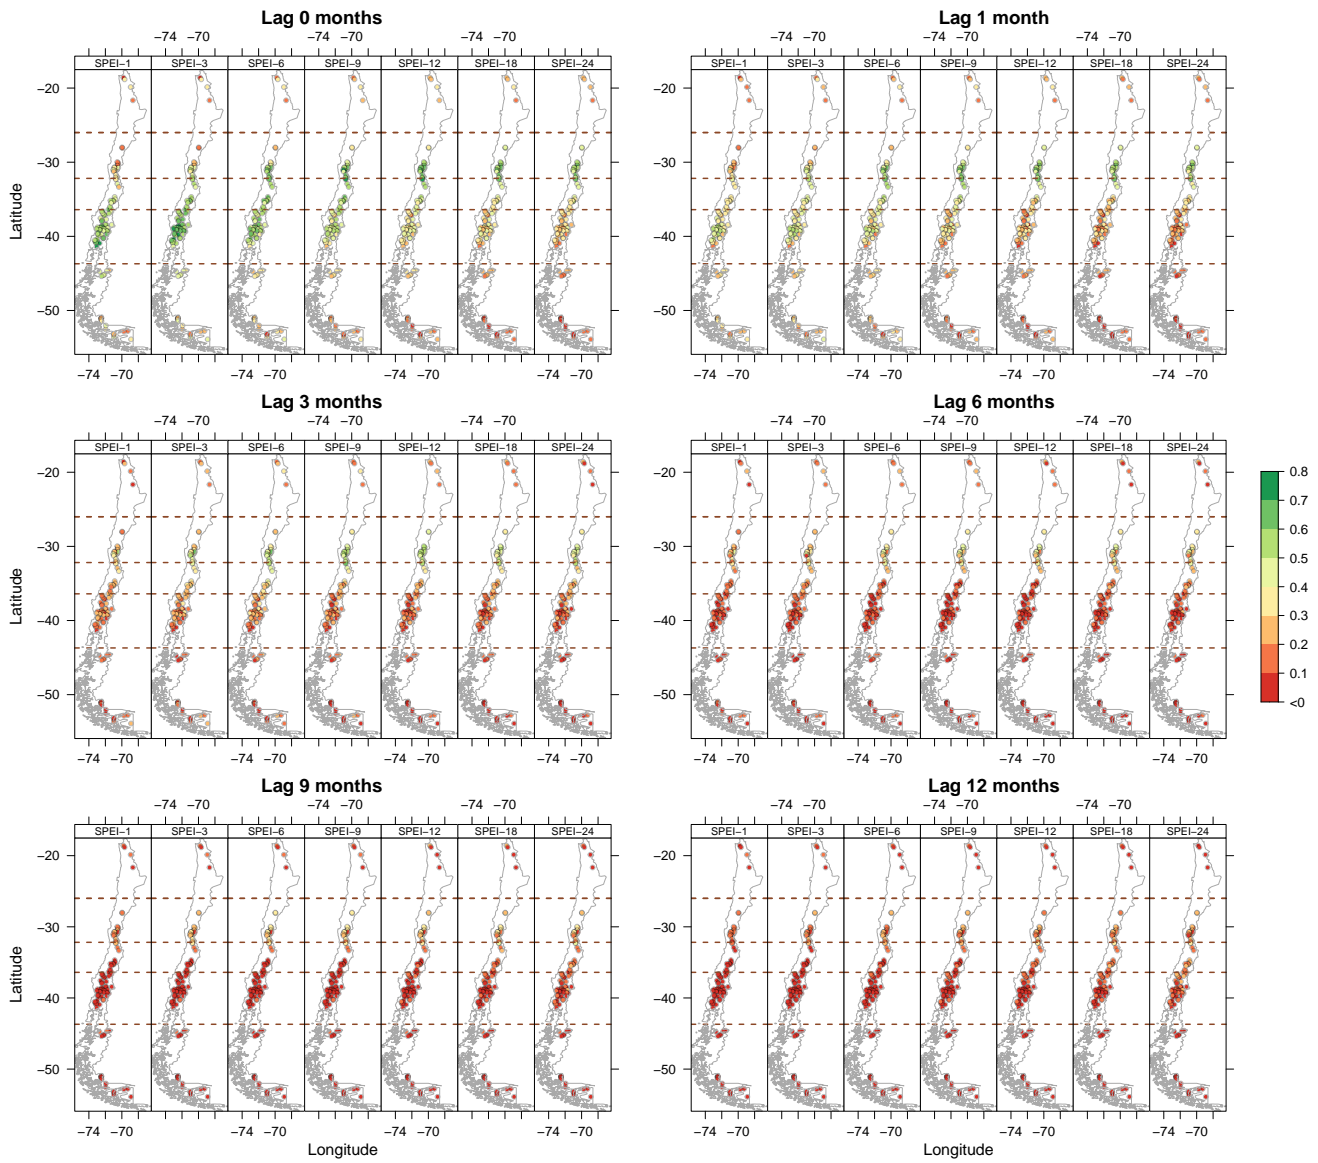

**Figure S9.** Spatial distribution of the cross-correlation results between the SPEI at different scales and the SSI-1 over 100 near-natural catchments at different lags (0, 1, 3, 6, 9, and 12 months).

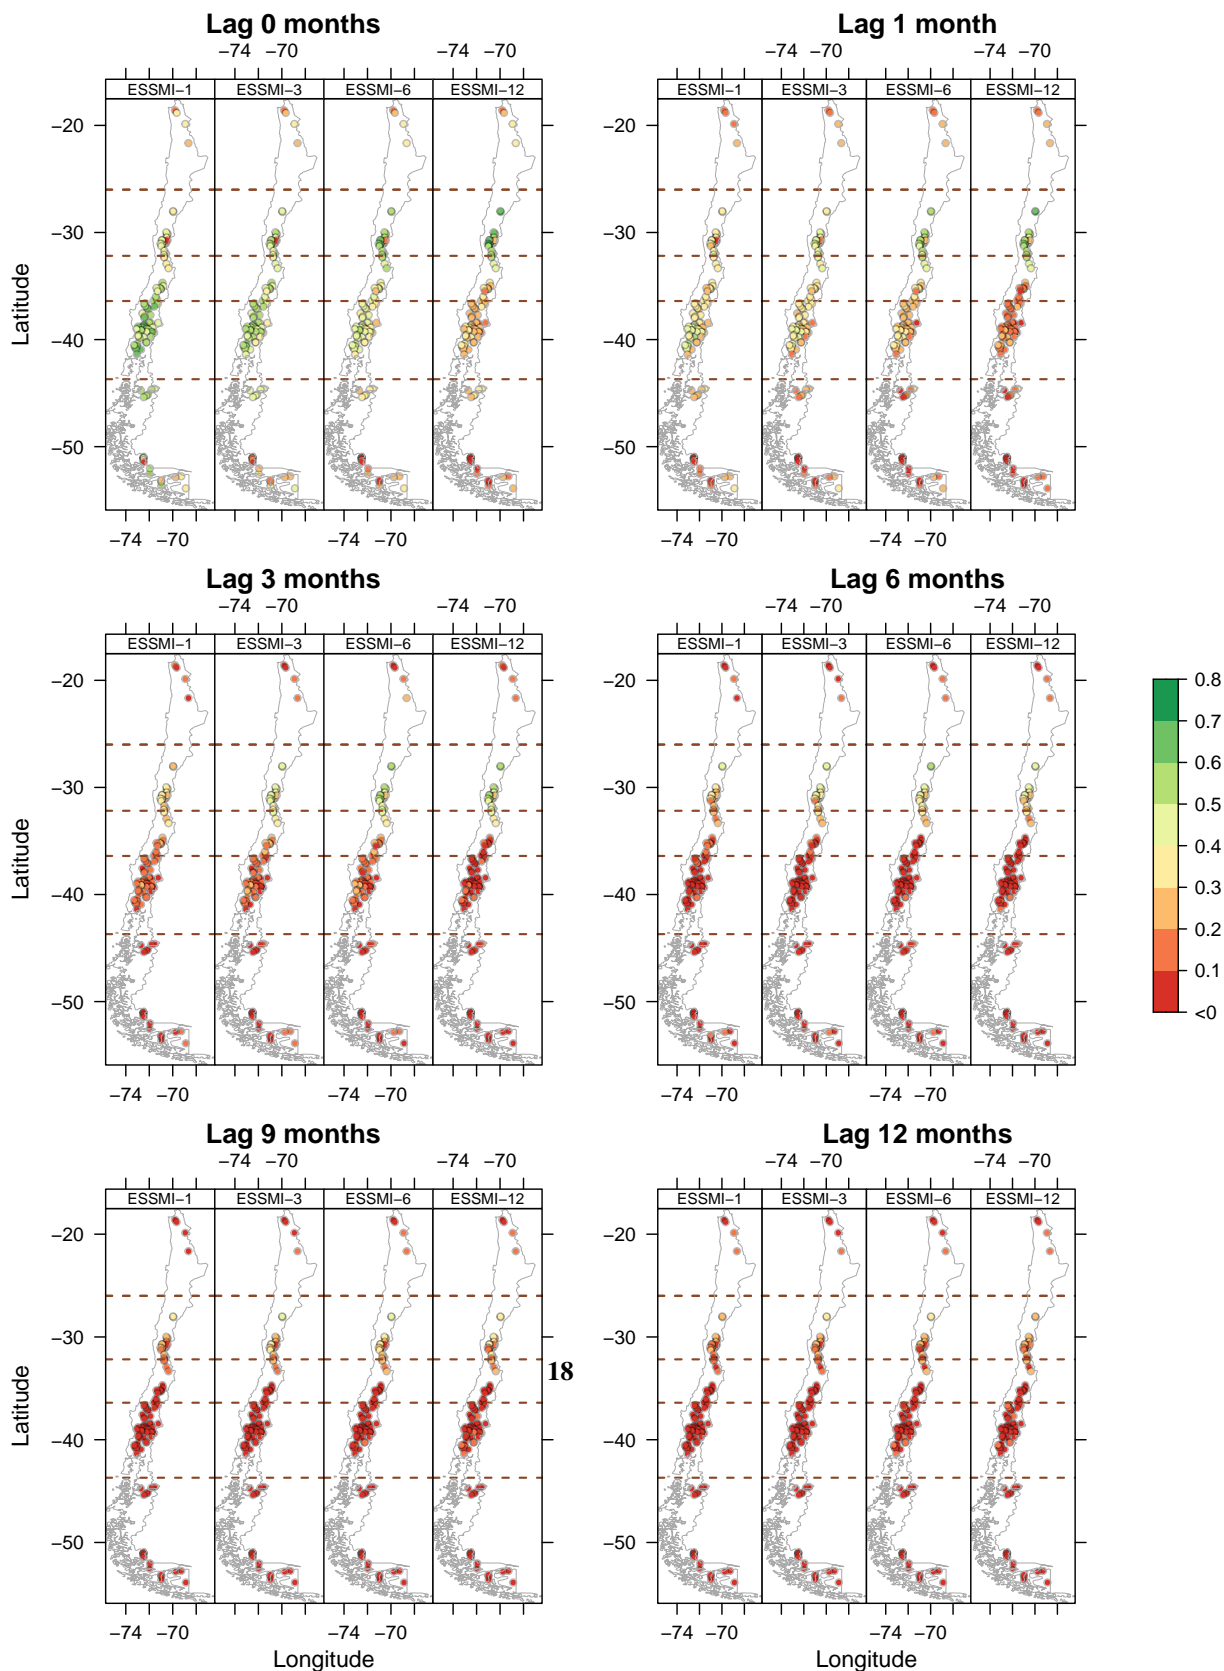

**Figure S10.** Spatial distribution of the cross-correlation results between the ESSMI at different scales and the SSI-1 over 100 near-natural catchments at different lags (0, 1, 3, 6, 9, and 12 months).

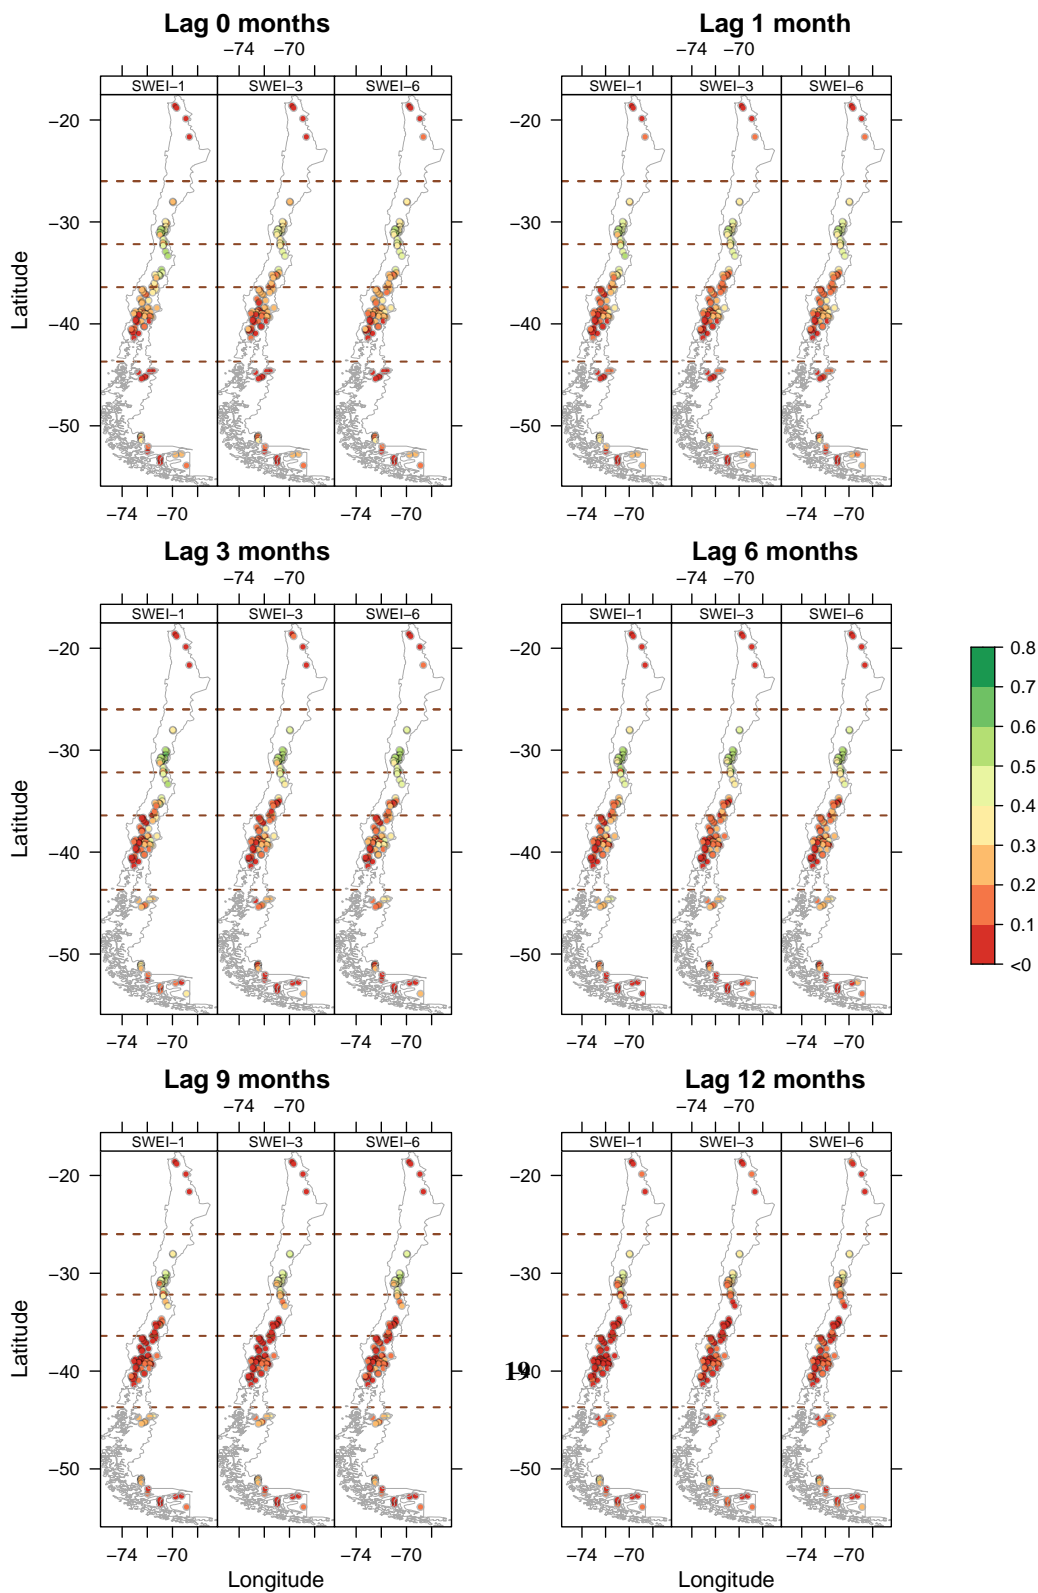

**Figure S11.** Spatial distribution of the cross-correlation results between the SWEI at different scales and the SSI-1 over 100 near-natural catchments at different lags (0, 1, 3, 6, 9, and 12 months).

## 4.2 Event coincidence analysis

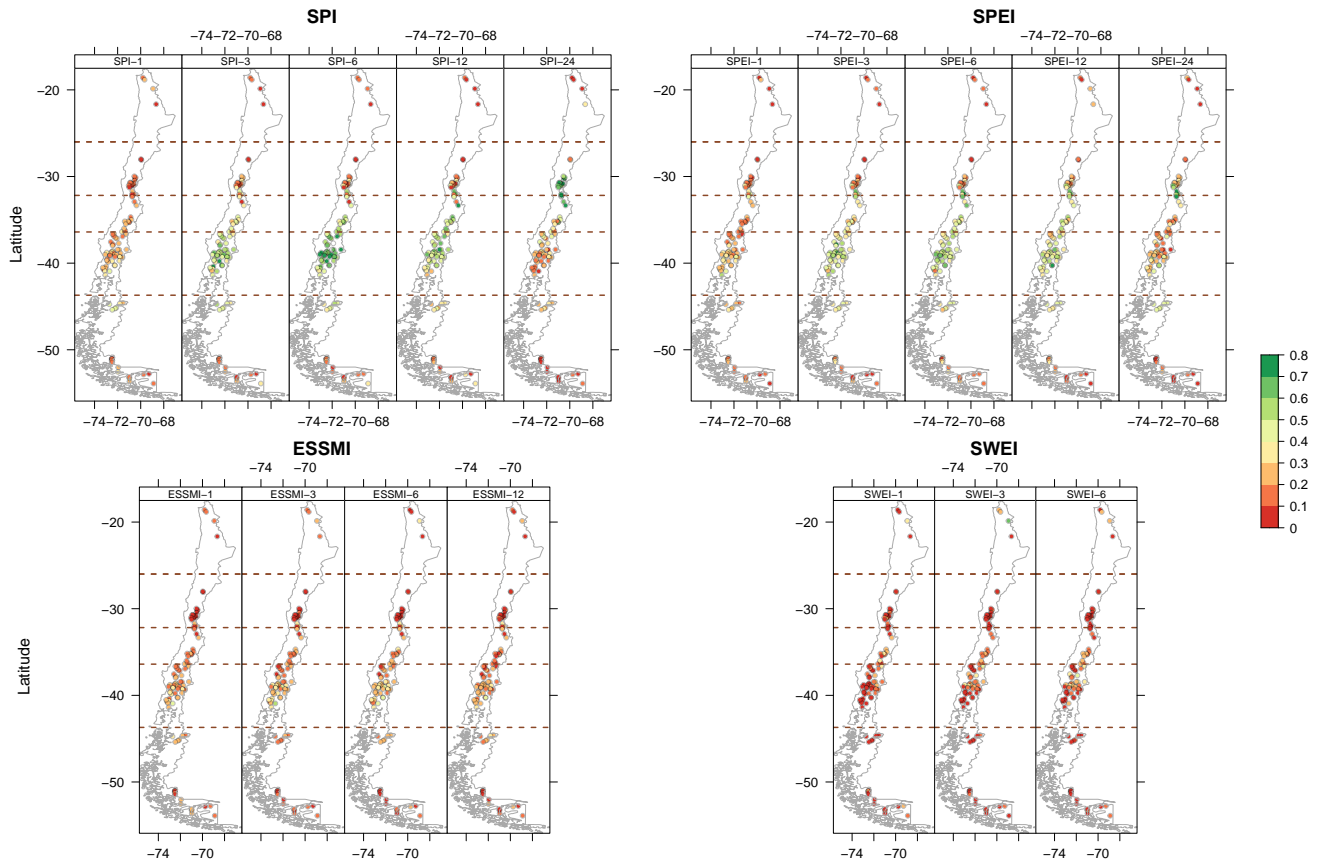

**Figure S12.** Spatial distribution of the event coincidence analysis results for severe droughts between the selected indices and the SSI-1 over 100 near-natural catchments and at a lag of zero months.



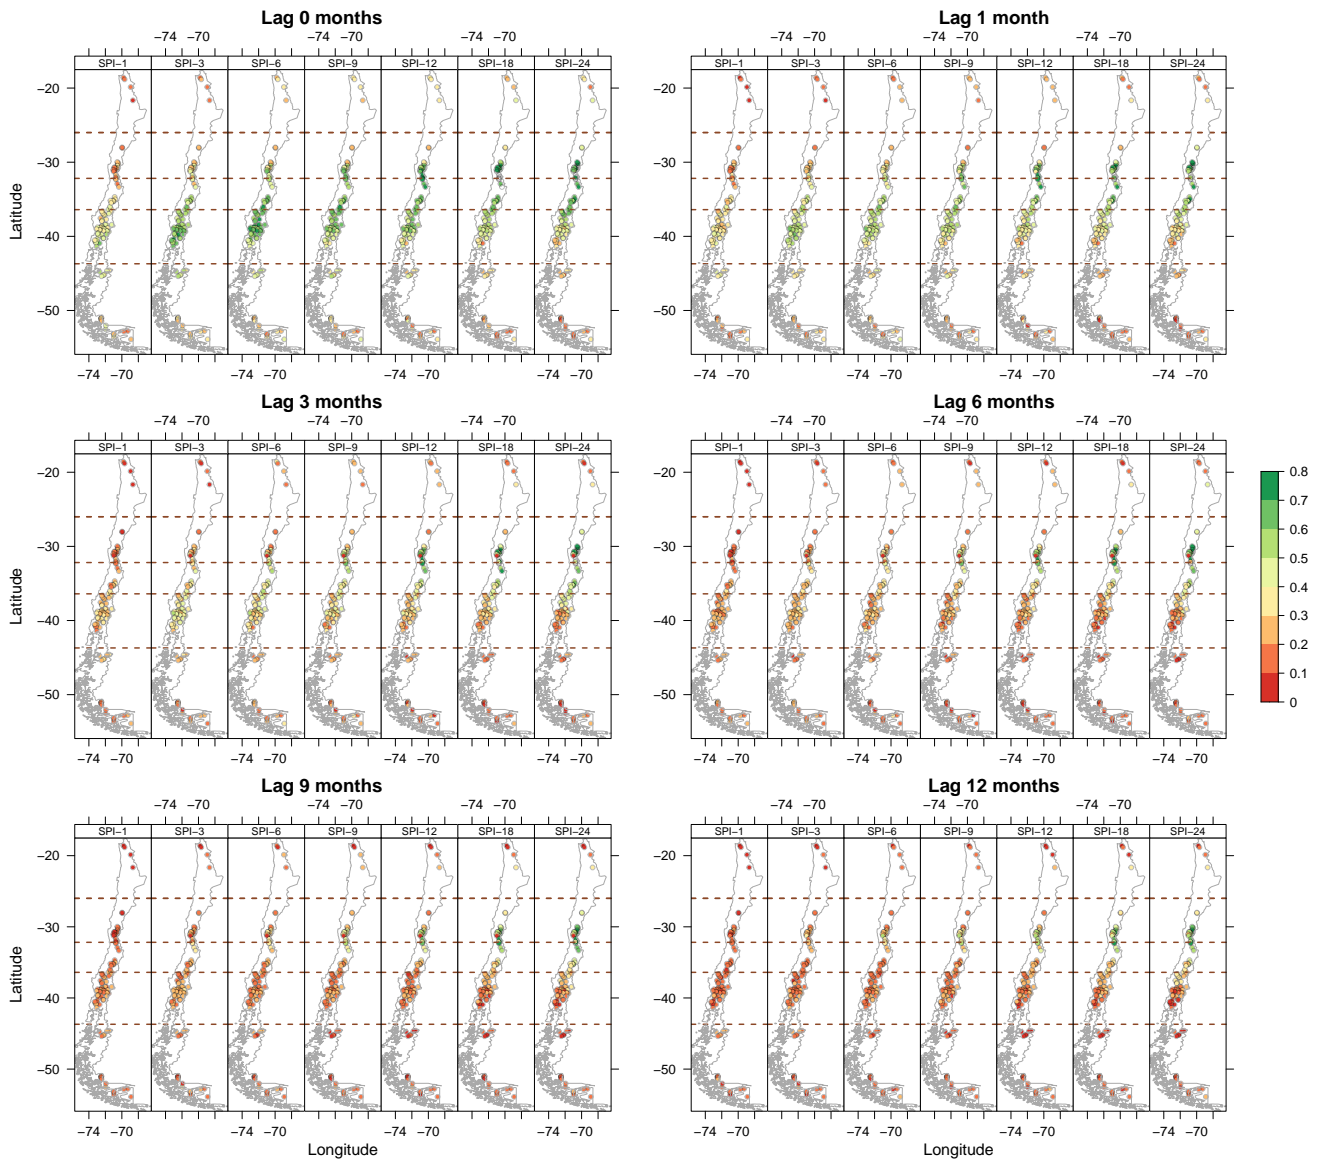

**Figure S13.** Spatial distribution of the event coincidence analysis results for moderate droughts between the SPI and the SSI-1 over 100 near-natural catchments and at different lags (0, 1, 3, 6, 9, and 12 months).

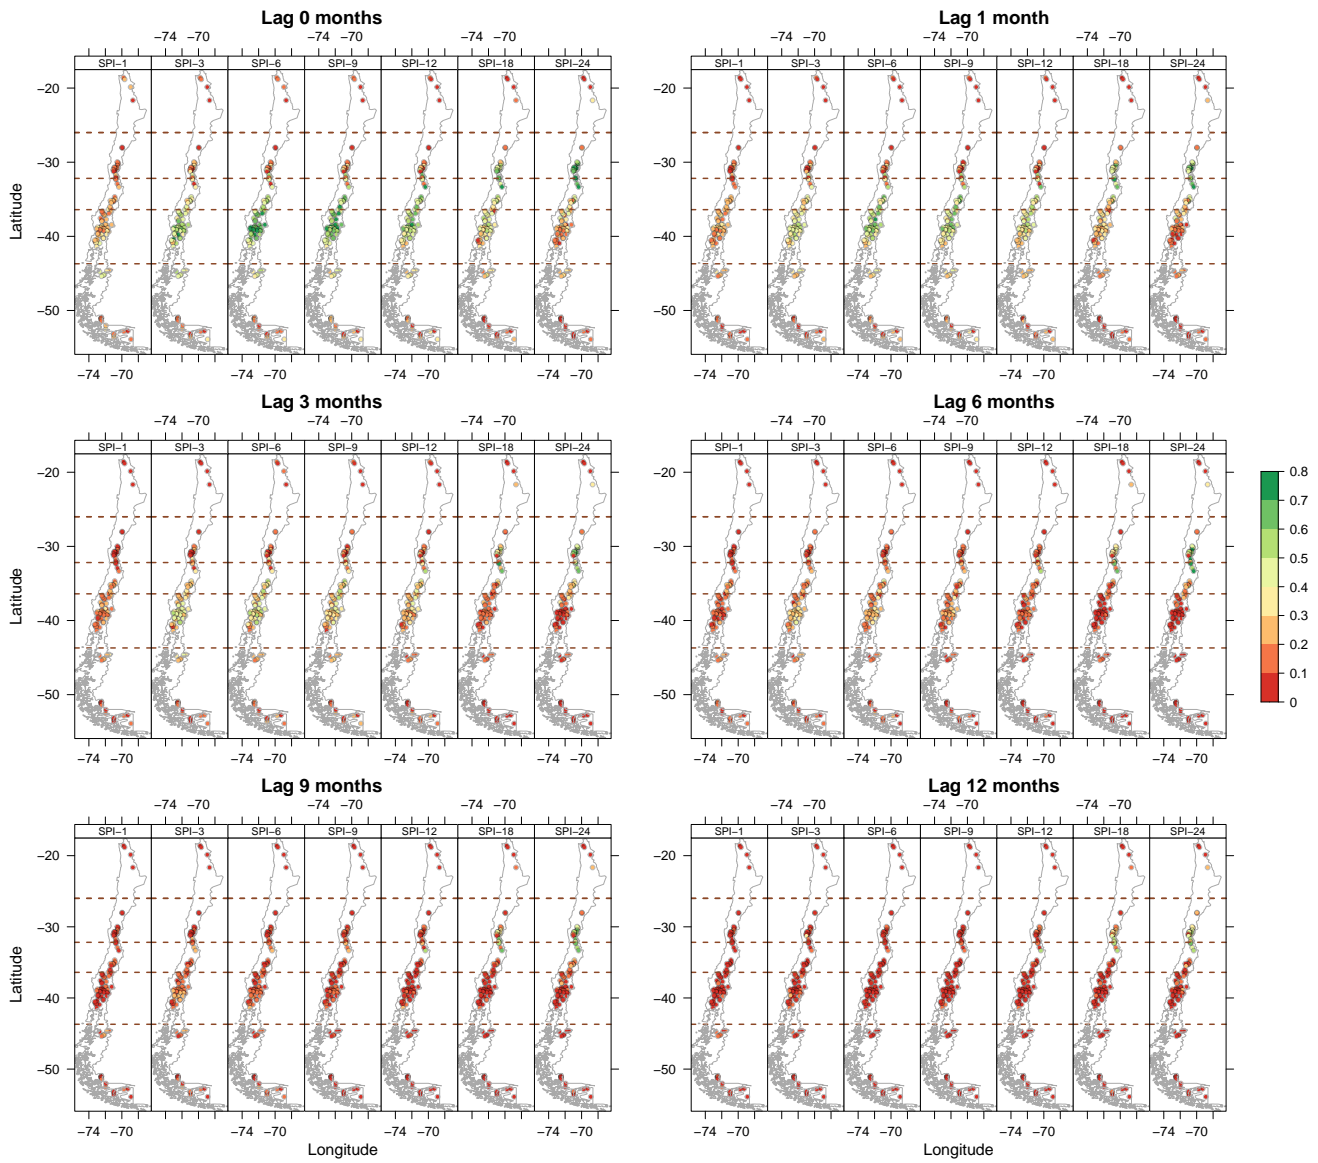

**Figure S14.** Spatial distribution of the event coincidence analysis results for severe droughts between the SPI and the SSI-1 over 100 near-natural catchments and at different lags (0, 1, 3, 6, 9, and 12 months).

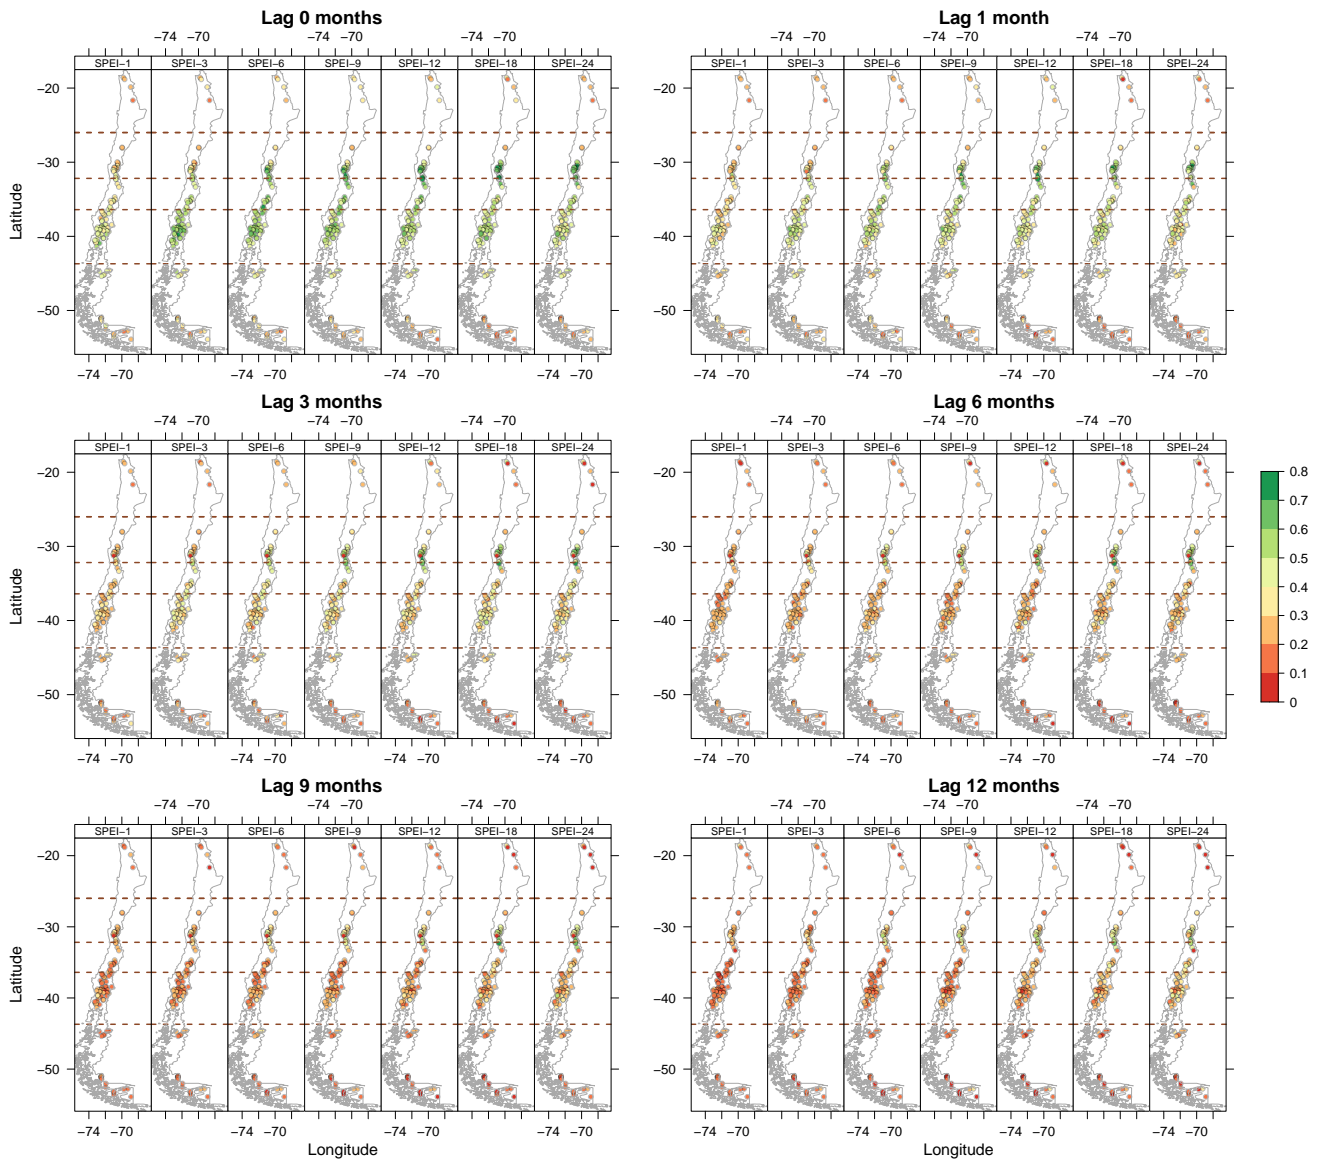

**Figure S15.** Spatial distribution of the event coincidence analysis results for moderate droughts between the SPEI and the SSI-1 over 100 near-natural catchments and at different lags (0, 1, 3, 6, 9, and 12 months).

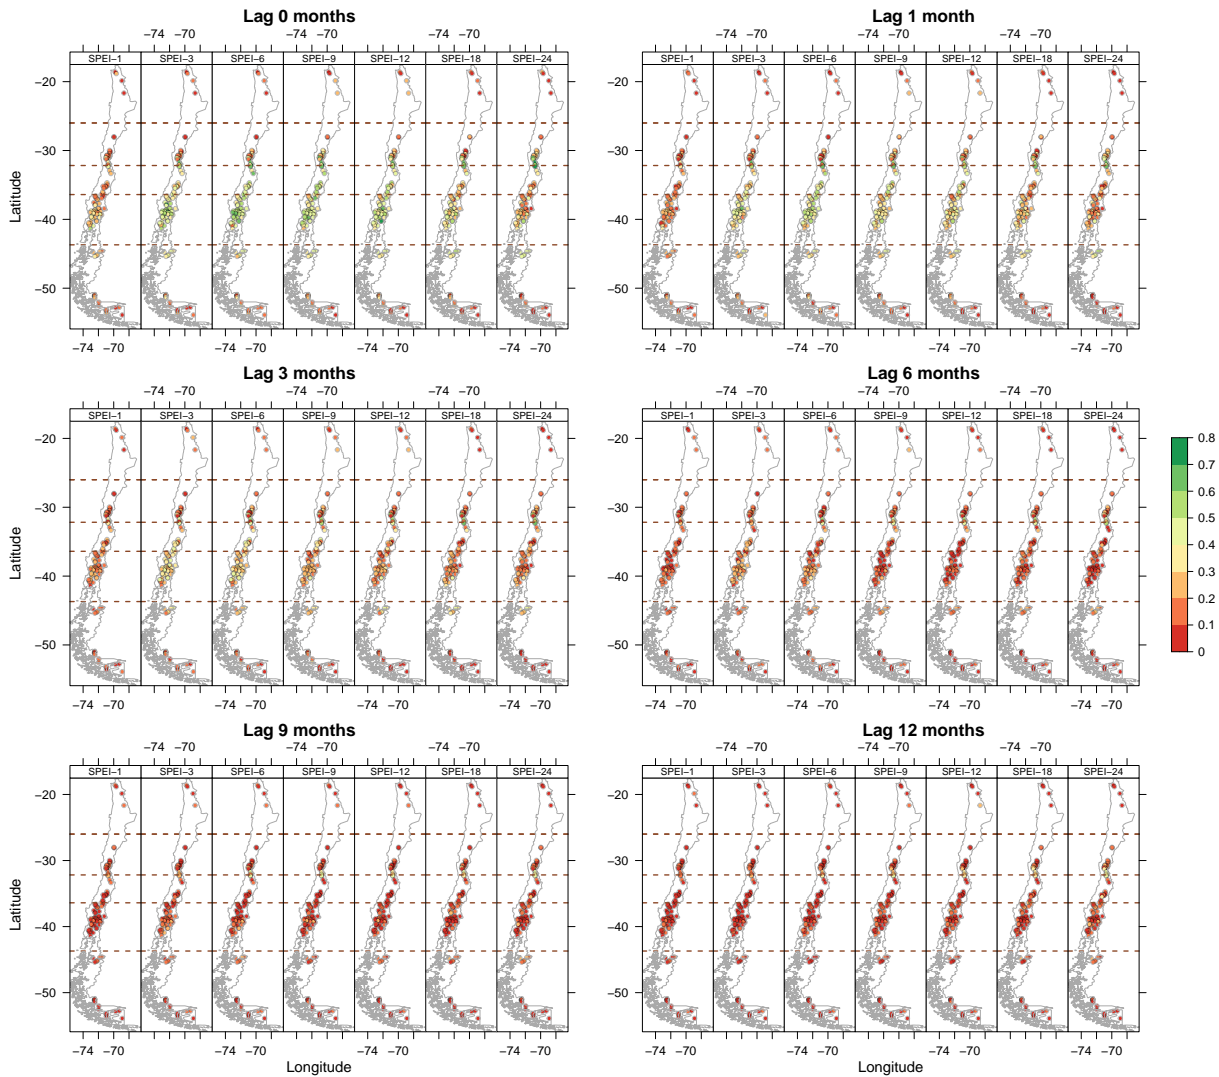

**Figure S16.** Spatial distribution of the event coincidence analysis results for severe droughts between the SPEI and the SSI-1 over 100 near-natural catchments and at different lags (0, 1, 3, 6, 9, and 12 months).

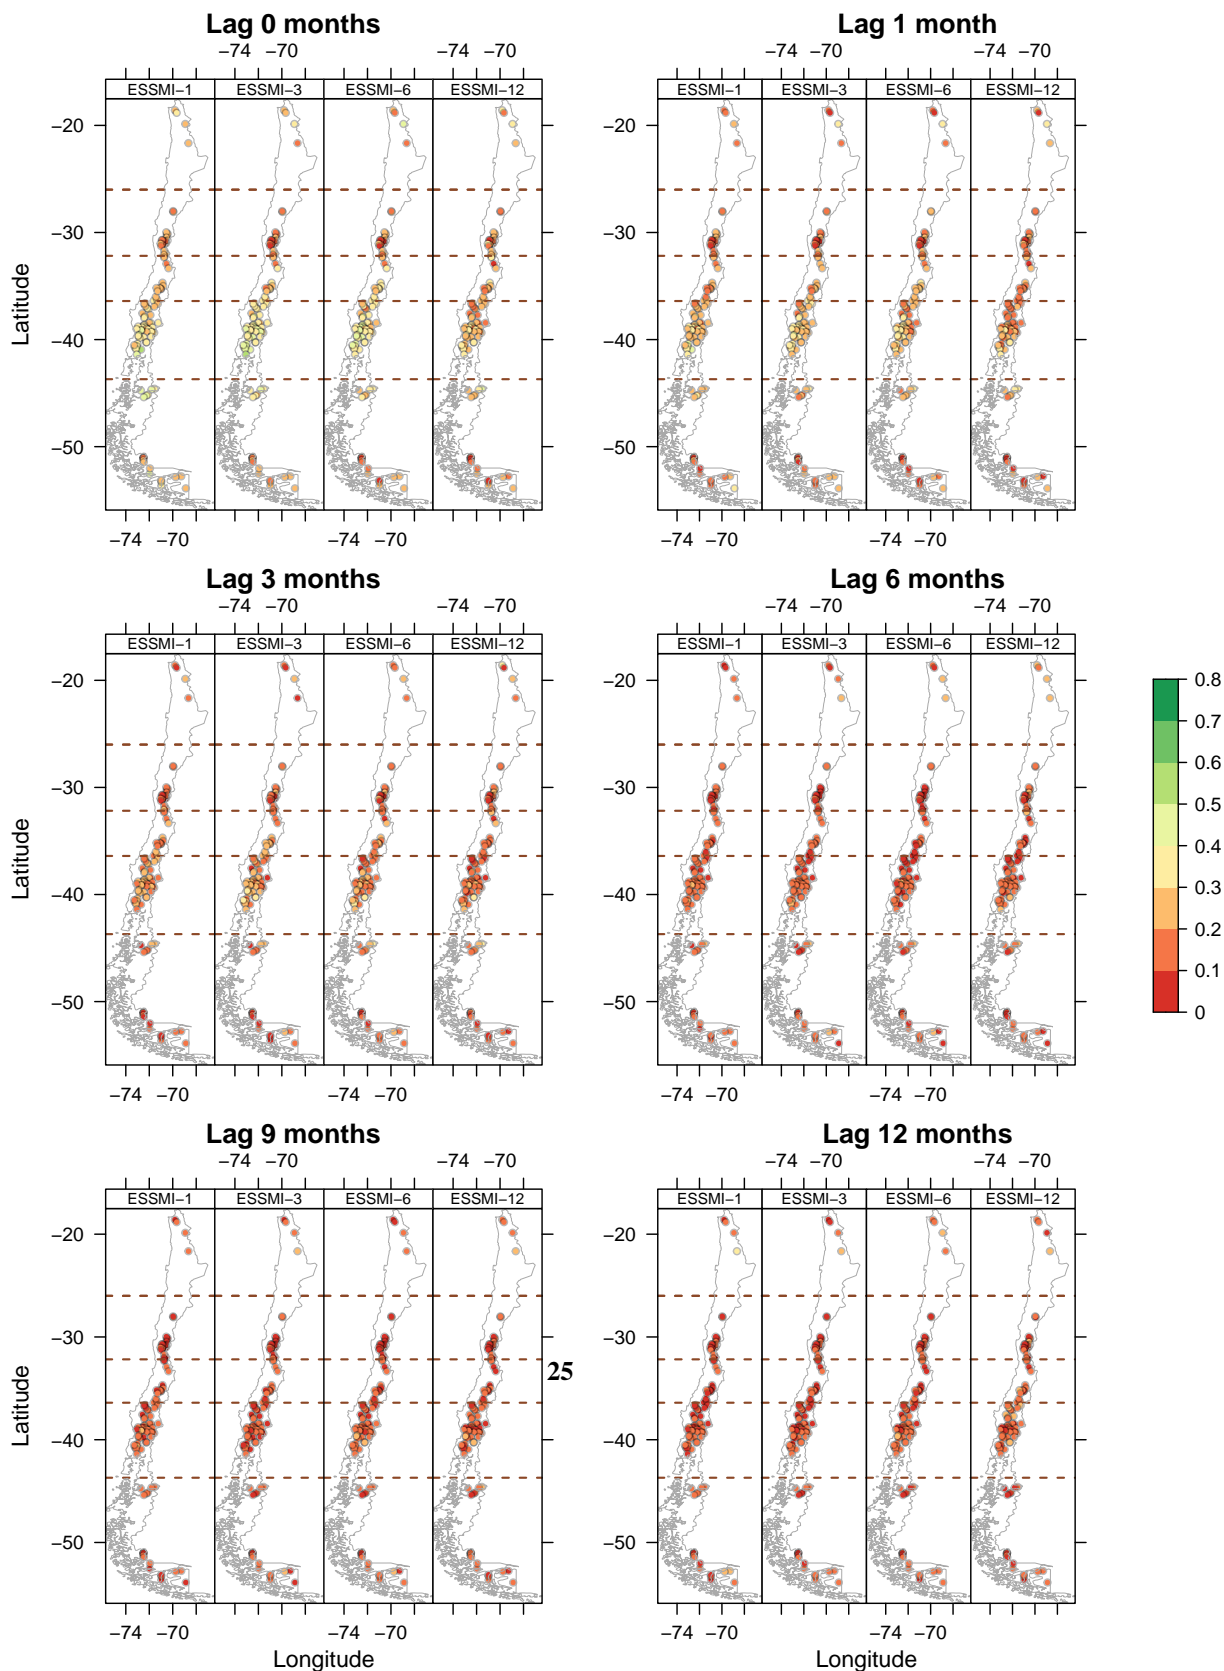

**Figure S17.** Spatial distribution of the event coincidence analysis results for severe droughts between the ESSMI and the SSI-1 over 100 near-natural catchments and at different lags (0, 1, 3, 6, 9, and 12 months).

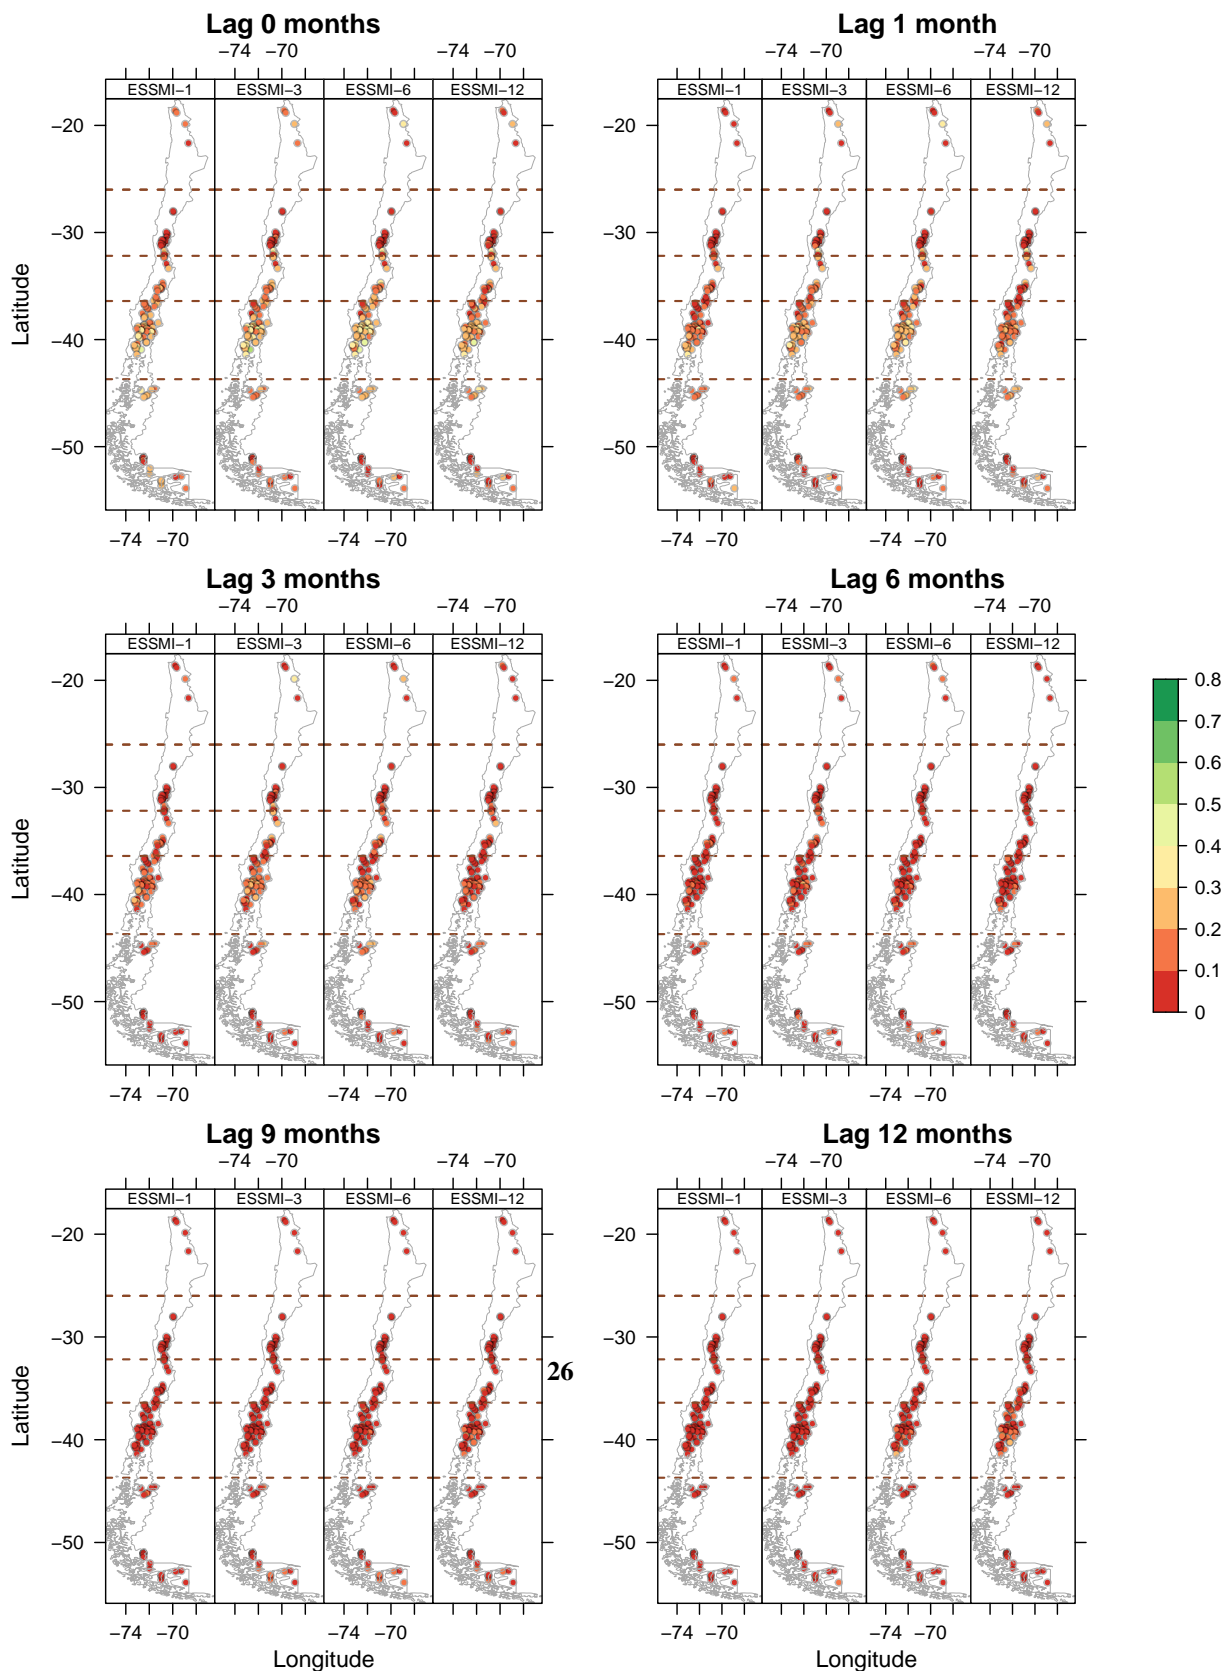

**Figure S18.** Spatial distribution of the event coincidence analysis results for severe droughts between the ESSMI and the SSI-1 over 100 near-natural catchments and at different lags (0, 1, 3, 6, 9, and 12 months).



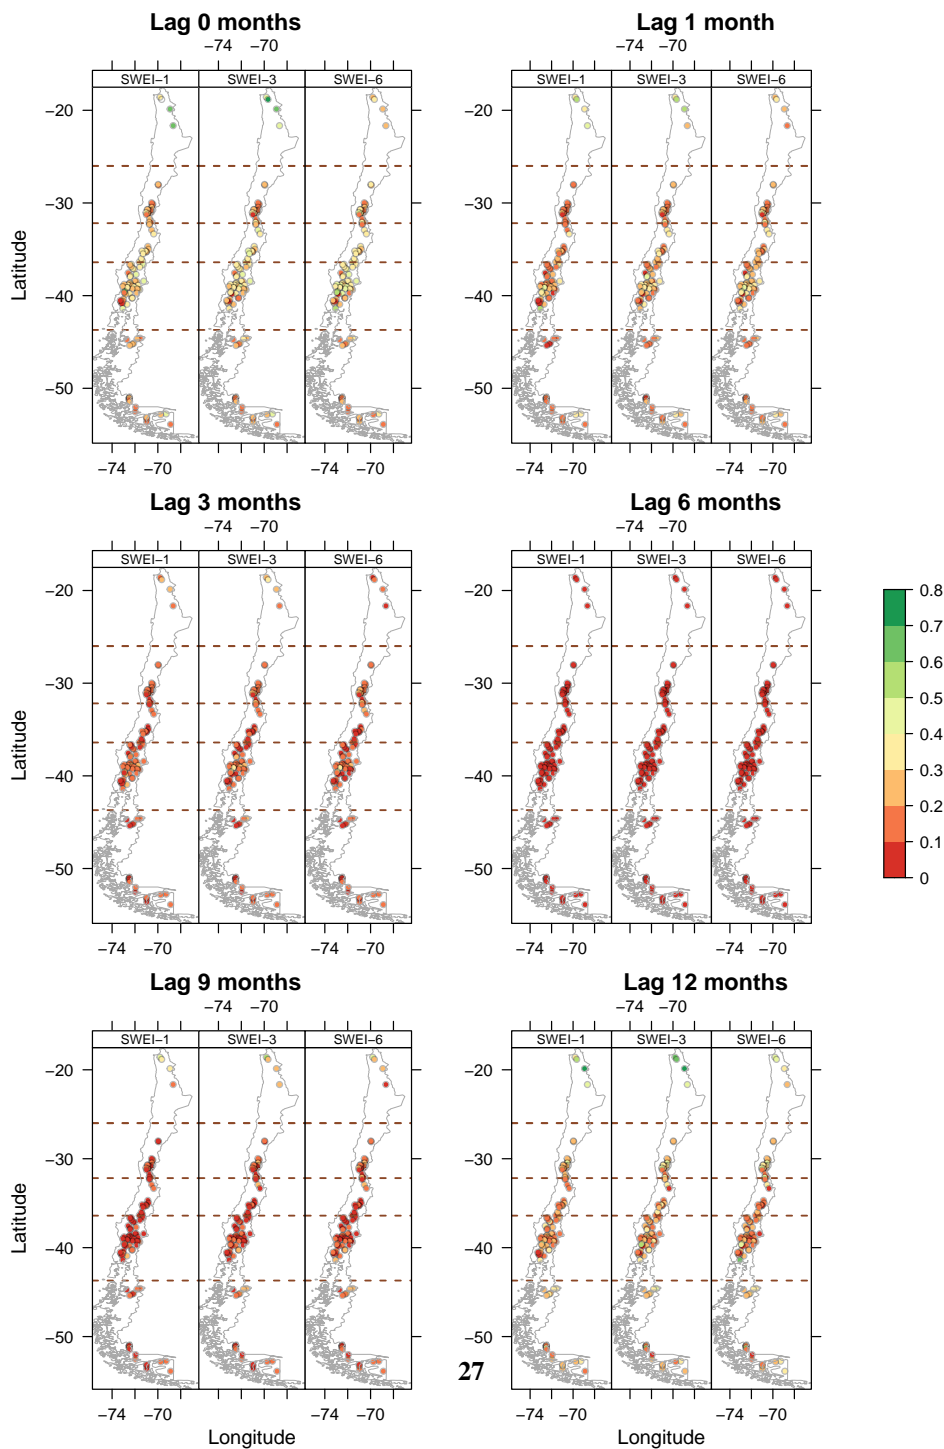

**Figure S19.** Spatial distribution of the event coincidence analysis results for moderate droughts between the SWEI and the SSI-1 over 100 near-natural catchments and at different lags (0, 1, 3, 6, 9, and 12 months).

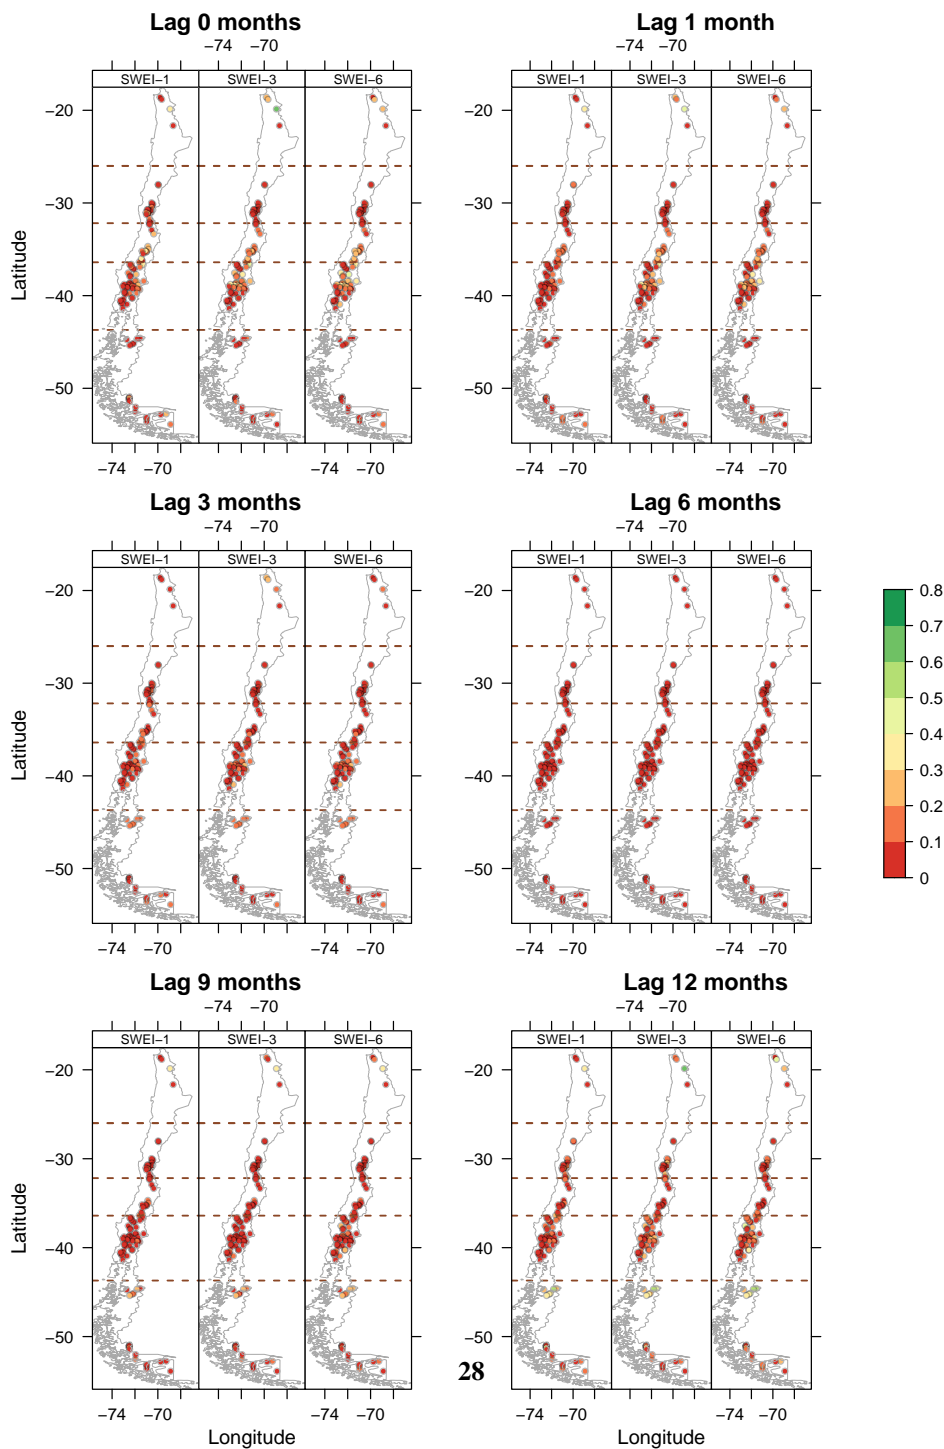

**Figure S20.** Spatial distribution of the event coincidence analysis results for severe droughts between the SWEI and the SSI-1 over 100 near-natural catchments and at different lags (0, 1, 3, 6, 9, and 12 months).



## **5. Cross-Correlation analysis – Hydrological Regimes**

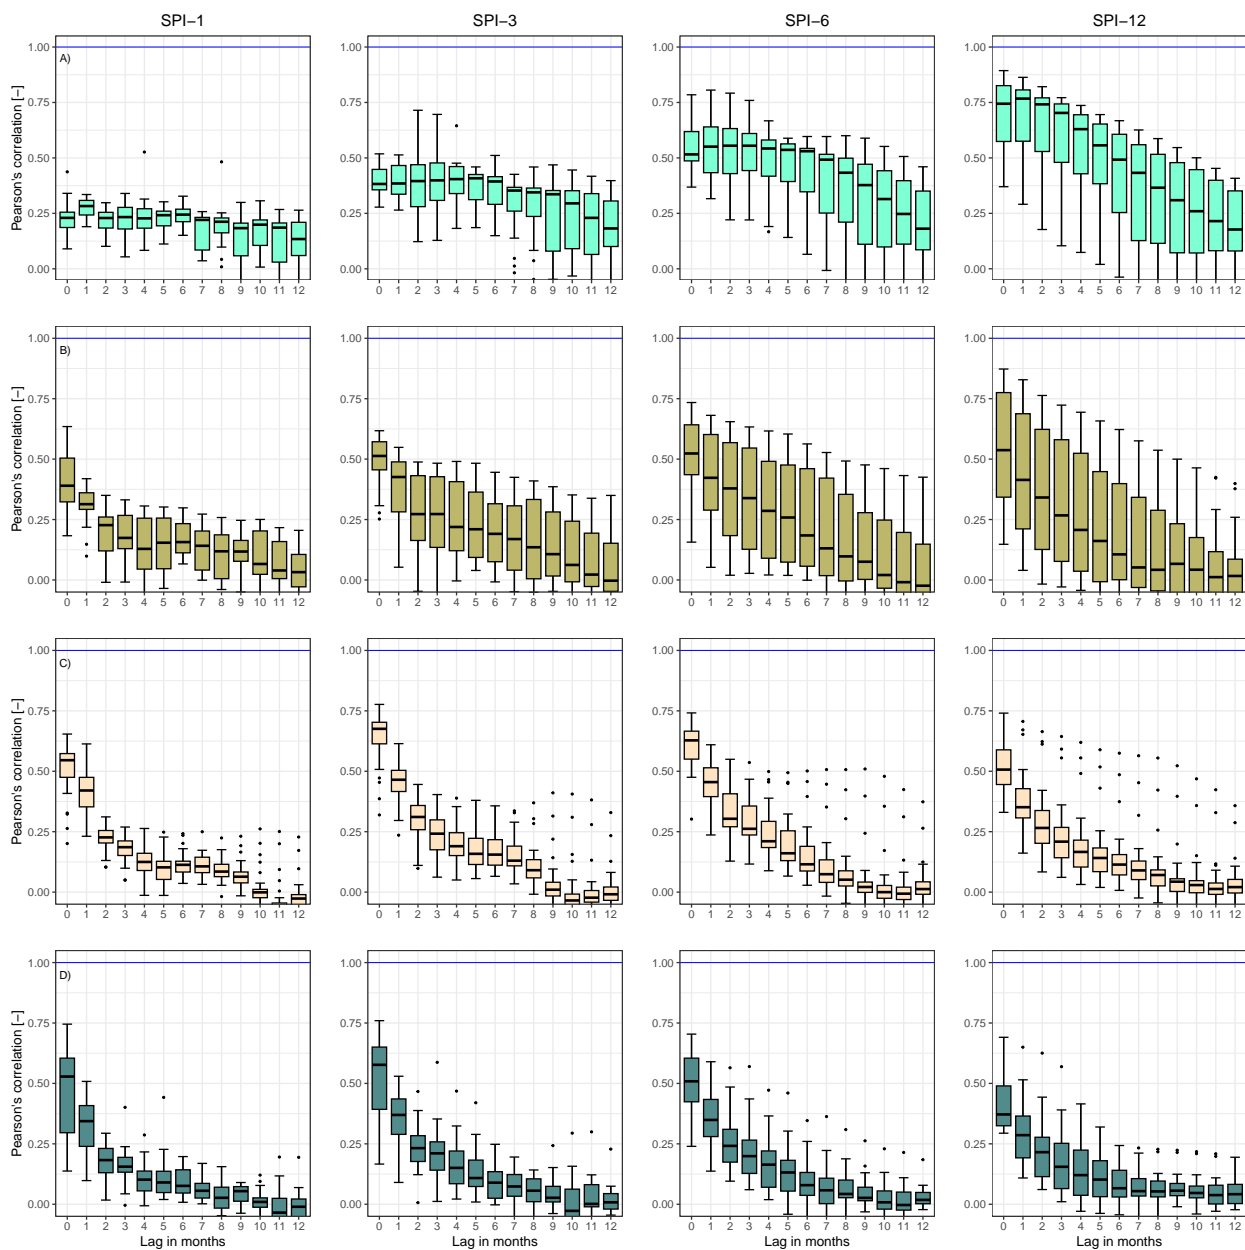

**Figure S21.** cross-correlation results of the SPI and the SSI-1 at different lag periods (ranging from 0 to 12 months) for *i*) snow-dominated catchments (a); *ii*) nivo-pluvial (b); *iii*) pluvio-nival (c); and *iv*) rain-dominated (d) catchments. The blue line indicates the optimal cross-correlation. The solid line within each box represents the median value, the edges of the boxes represent the first and third quartiles, and the whiskers extend to the most extreme data point which is no more than 1.5 times the interquartile range from the box.

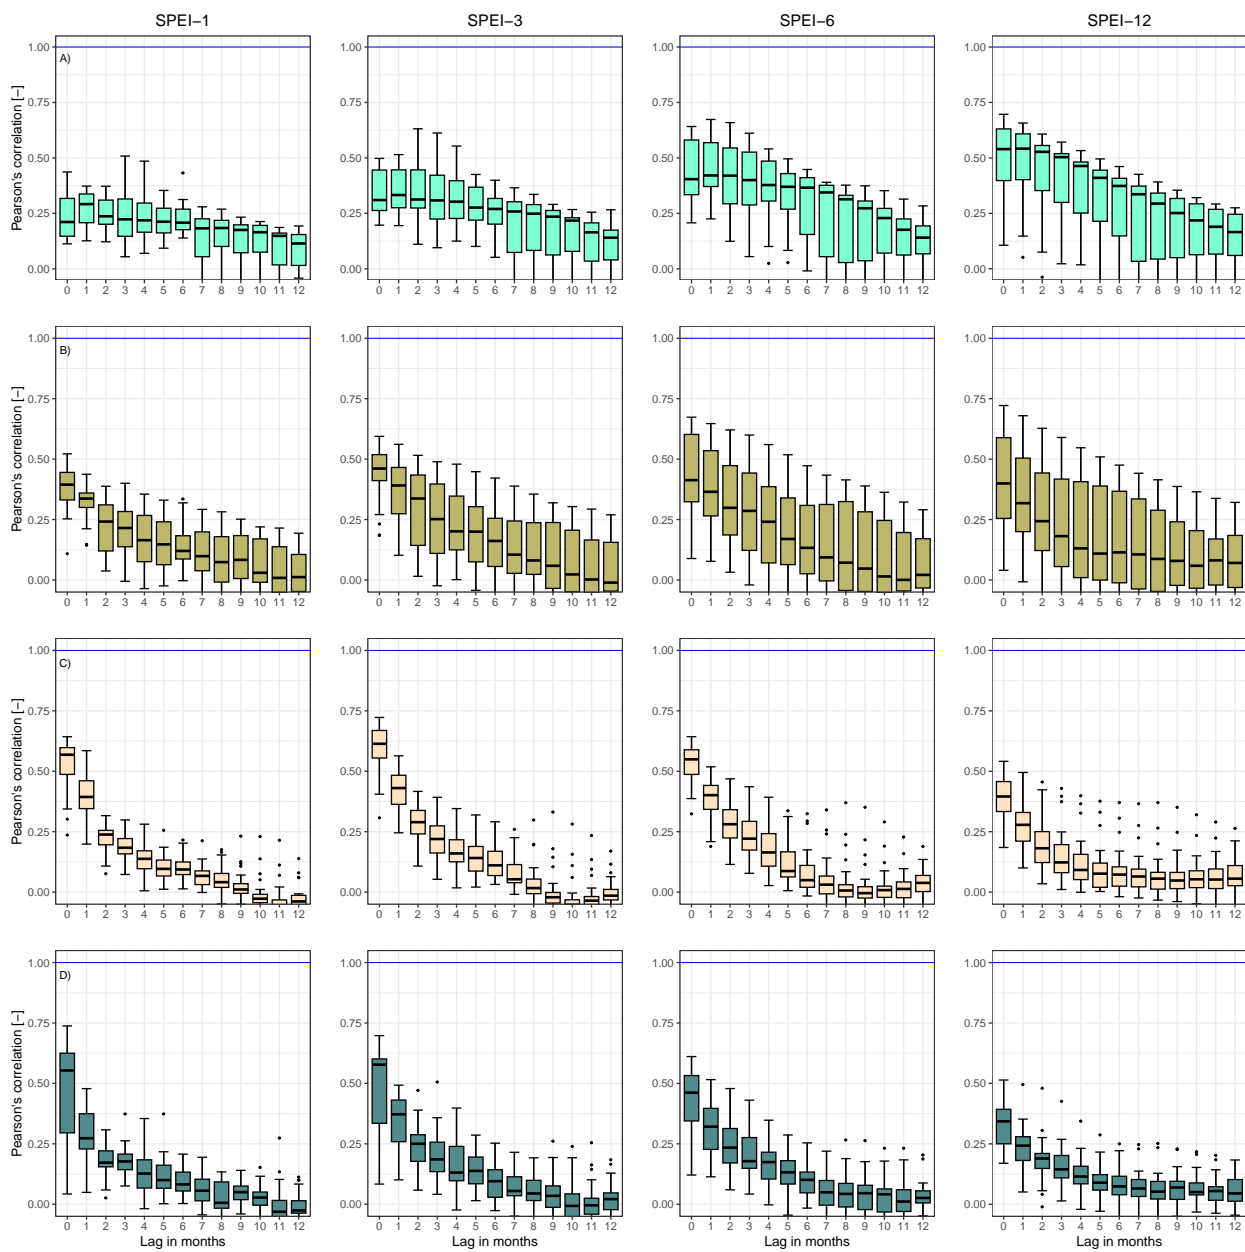

**Figure S22.** cross-correlation results of the SPEI and the SSI-1 at different lag periods (ranging from 0 to 12 months) for *i*) snow-dominated catchments (a); *ii*) nivo-pluvial (b); *iii*) pluvio-nival (c); and *iv*) rain-dominated (d) catchments. The blue line indicates the optimal cross-correlation. The solid line within each box represents the median value, the edges of the boxes represent the first and third quartiles, and the whiskers extend to the most extreme data point which is no more than 1.5 times the interquartile range from the box.

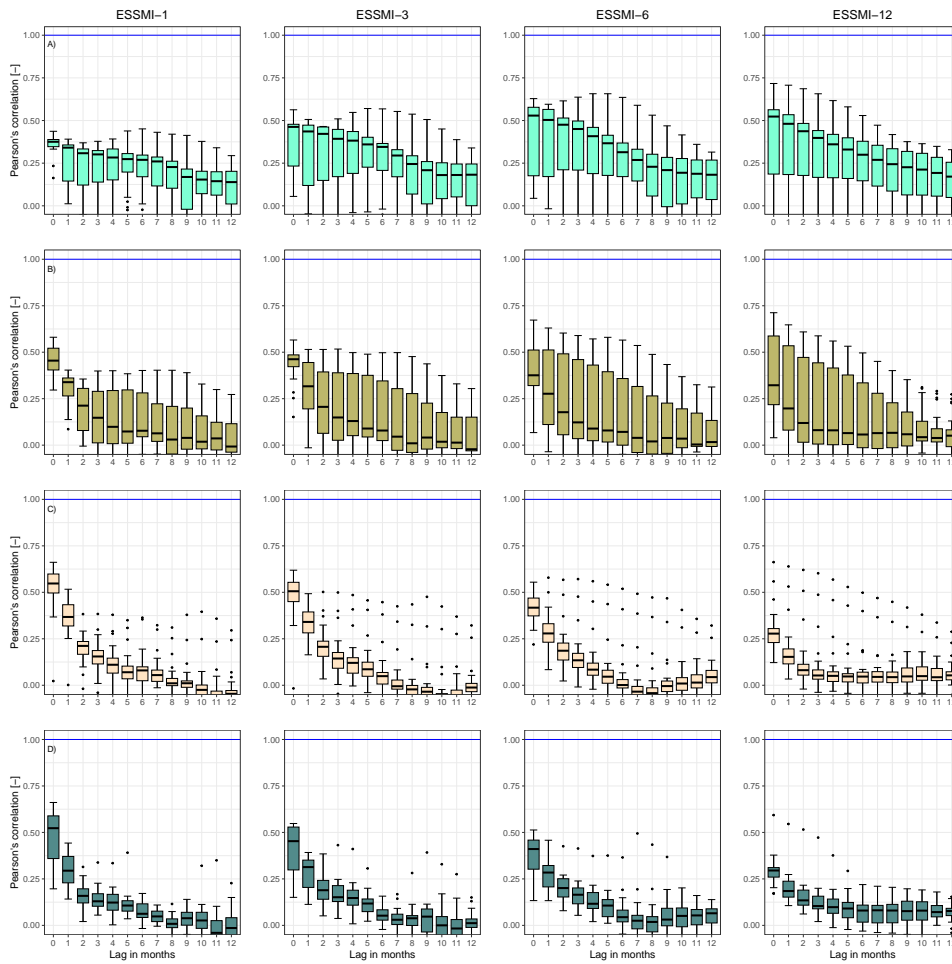

**Figure S23.** cross-correlation results of the ESSMI and the SSI-1 at different lag periods (ranging from 0 to 12 months) for *i*) snow-dominated catchments (a); *ii*) nivo-pluvial (b); *iii*) pluvio-nival (c); and *iv*) rain-dominated (d) catchments. The blue line indicates the optimal cross-correlation. The solid line within each box represents the median value, the edges of the boxes represent the first and third quartiles, and the whiskers extend to the most extreme data point which is no more than 1.5 times the interquartile range from the box.

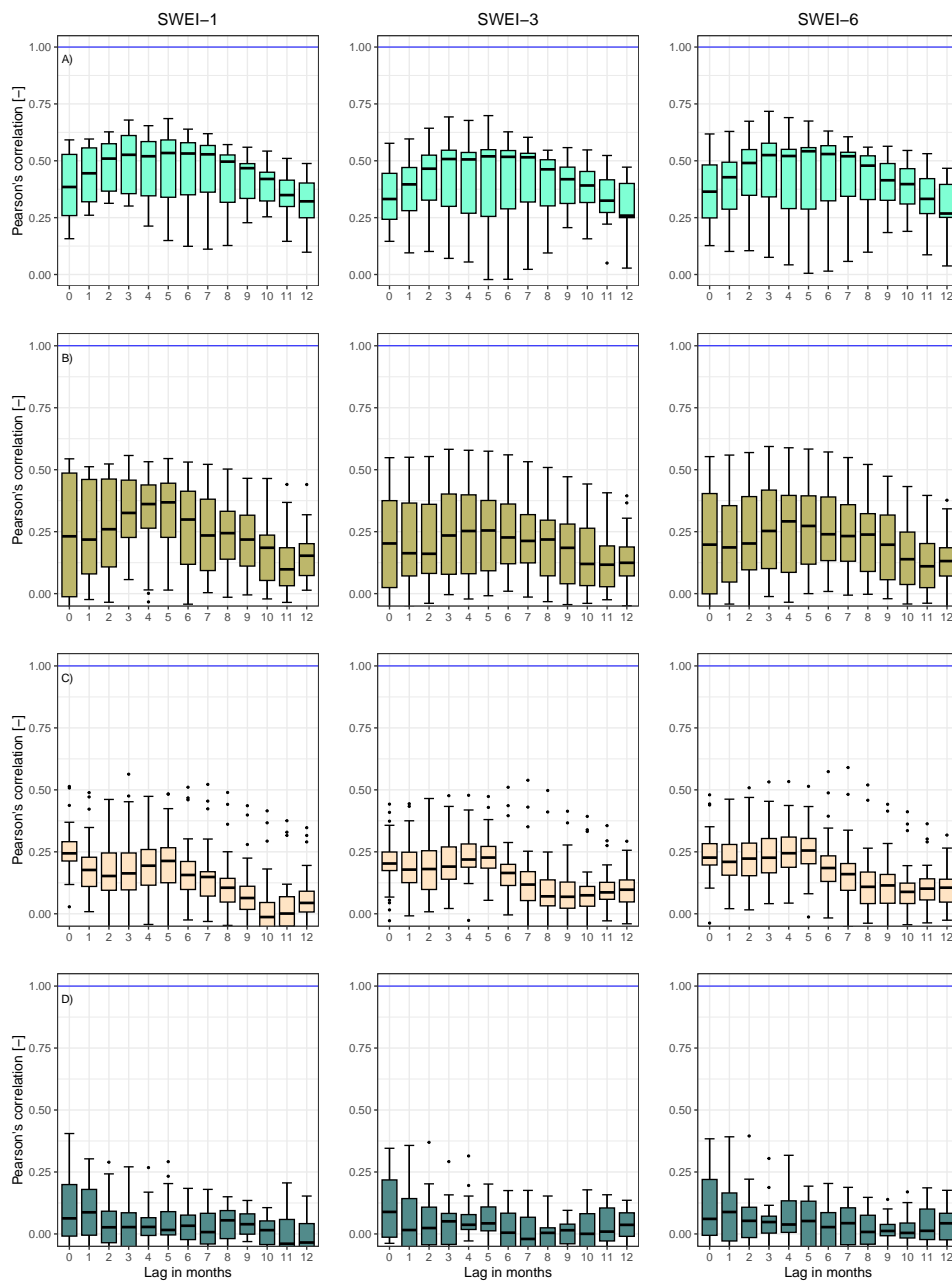

**Figure S24.** cross-correlation results of the SWEI and the SSI-1 at different lag periods (ranging from 0 to 12 months) for *i*) snow-dominated catchments (a); *ii*) nivo-pluvial (b); *iii*) pluvio-nival (c); and *iv*) rain-dominated (d) catchments. The blue line indicates the optimal cross-correlation. The solid line within each box represents the median value, the edges of the boxes represent the first and third quartiles, and the whiskers extend to the most extreme data point which is no more than 1.5 times the interquartile range from the box.

## **6. Event coincidence analysis – Hydrological Regimes**

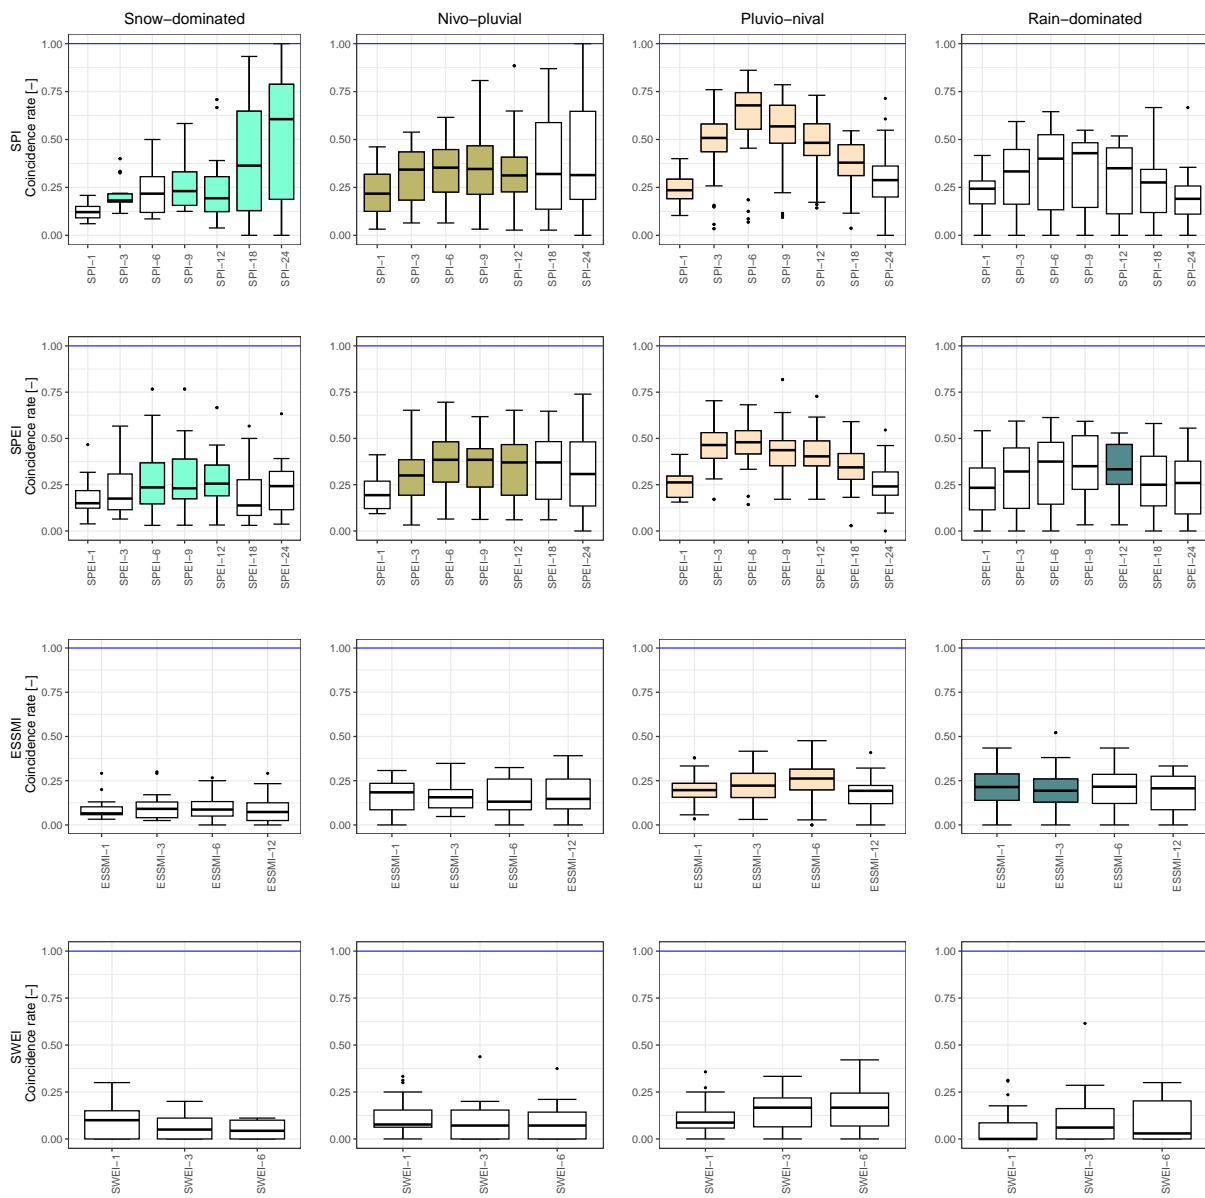

**Figure S25.** Event coincidence analysis results of the selected drought indices and the SSI-1 for severe droughts at a lag of zero months for *i*) nival; *ii*) nivo-pluvial; *iii*) pluvio-nival; and *iv*) pluvial catchments. The solid boxplots indicate those lags where at least 75% of the catchments presented significant results at the 95% confidence interval, while the white boxplots indicate the opposite. The blue line indicates the optimal cross-correlation. The solid line within each box represents the median value, the edges of the boxes represent the first and third quartiles, and the whiskers extend to the most extreme data point which is no more than 1.5 times the interquartile range from the box.

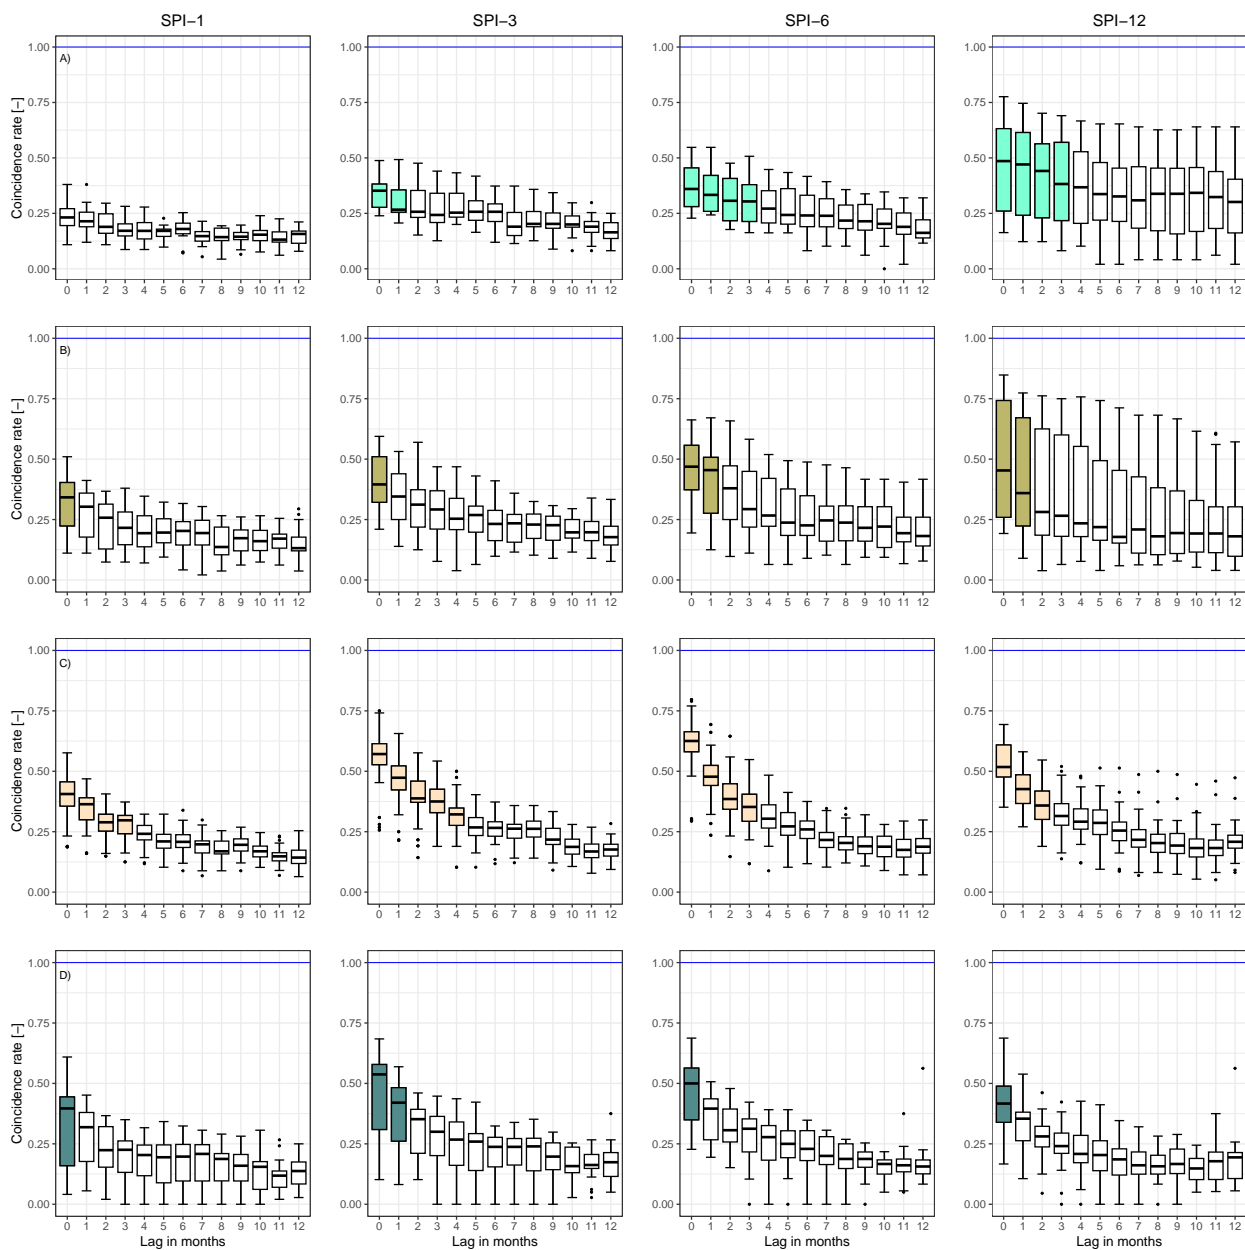

**Figure S26.** Event coincidence analysis results of the SPI and the SSI-1 for moderate droughts at different lag periods (ranging from 0 to 12 months) for *i*) snow-dominated (a); *ii*) nivo-pluvial (b); *iii*) pluvio-nival (c); and *iv*) rain-dominated (d) catchments. The solid coloured boxplots indicate those lags where at least 75% of the catchments presented significant results at the 95% confidence interval, while the white boxplots indicate the opposite. The blue line indicates the optimal cross-correlation. The solid line within each box represents the median value, the edges of the boxes represent the first and third quartiles, and the whiskers extend to the most extreme data point which is no more than 1.5 times the interquartile range from the box.



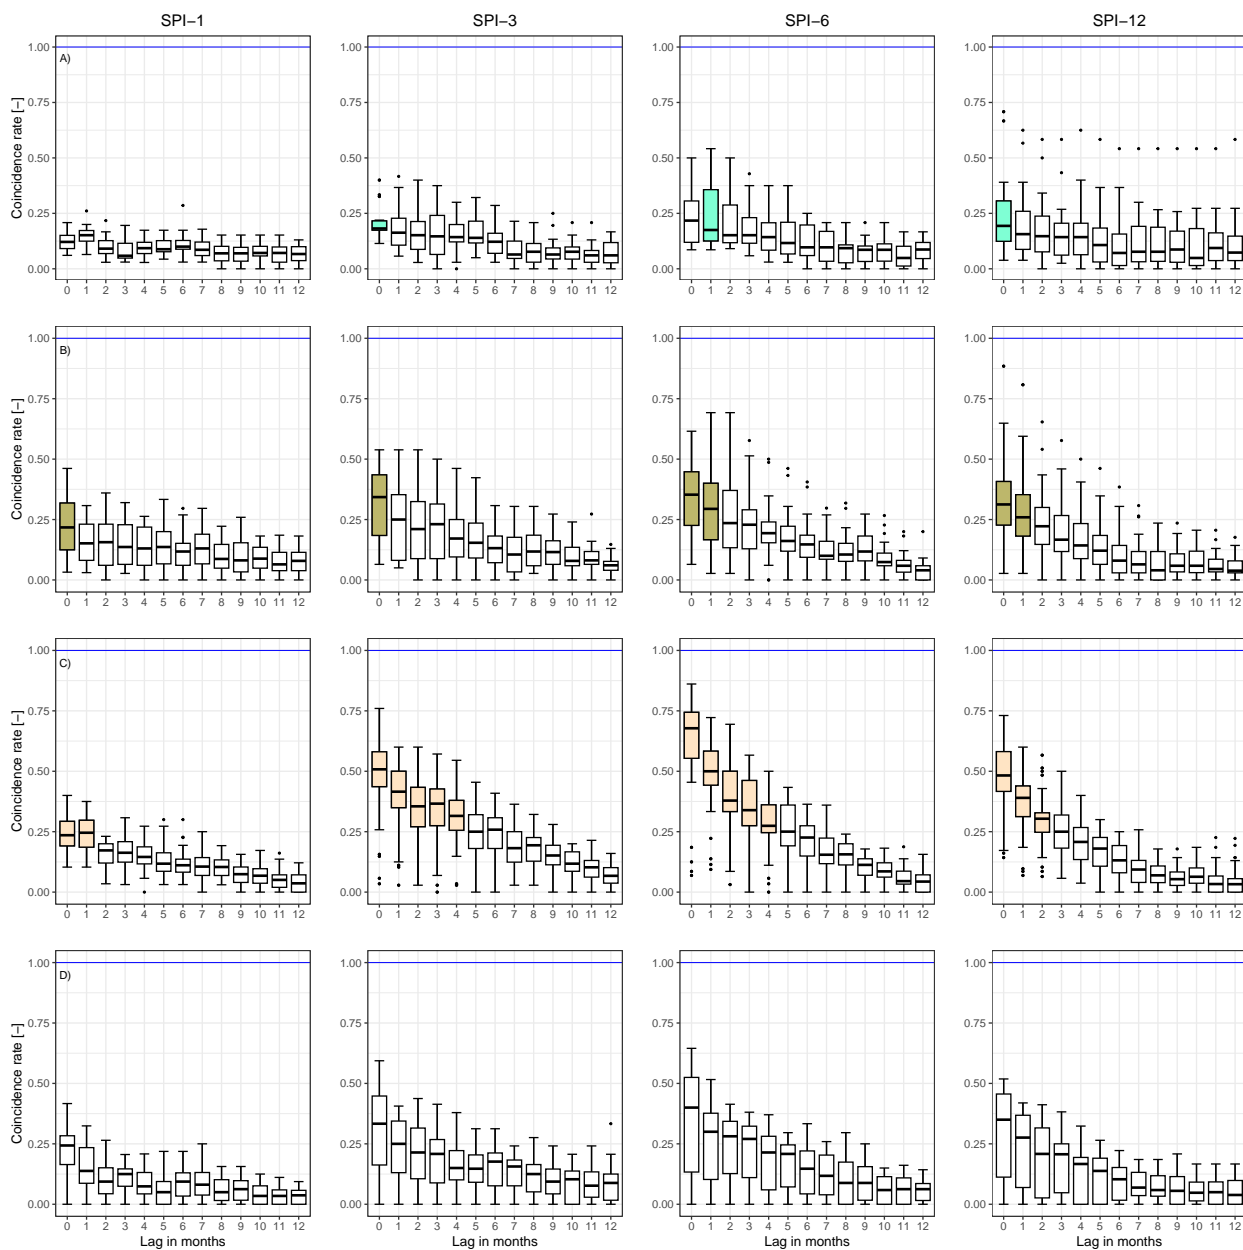

**Figure S27.** Event coincidence analysis results of the SPI and the SSI-1 for severe droughts at different lag periods (ranging from 0 to 12 months) for *i*) snow-dominated (a); *ii*) nivo-pluvial (b); *iii*) pluvio-nival (c); and *iv*) rain-dominated (d) catchments. The solid coloured boxplots indicate those lags where at least 75% of the catchments presented significant results at the 95% confidence interval, while the white boxplots indicate the opposite. The blue line indicates the optimal cross-correlation. The solid line within each box represents the median value, the edges of the boxes represent the first and third quartiles, and the whiskers extend to the most extreme data point which is no more than 1.5 times the interquartile range from the box.

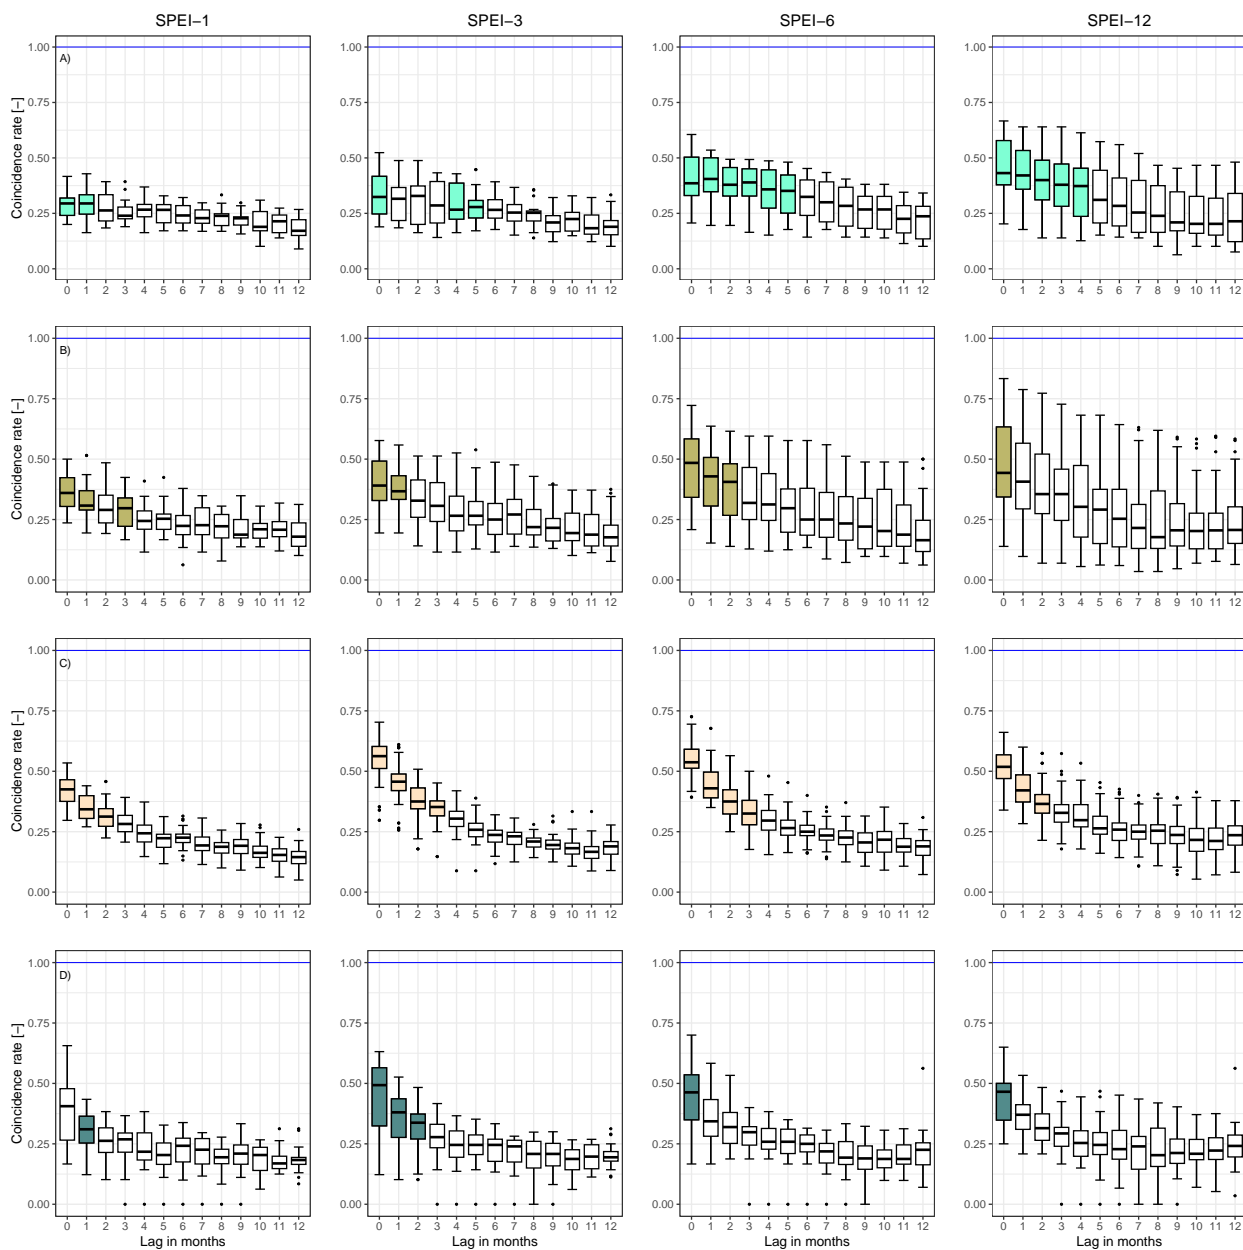

**Figure S28.** Event coincidence analysis results of the SPEI and the SSI-1 for moderate droughts at different lag periods (ranging from 0 to 12 months) for *i*) snow-dominated (a); *ii*) nivo-pluvial (b); *iii*) pluvio-nival (c); and *iv*) rain-dominated (d) catchments. The solid coloured boxplots indicate those lags where at least 75% of the catchments presented significant results at the 95% confidence interval, while the white boxplots indicate the opposite. The blue line indicates the optimal cross-correlation. The solid line within each box represents the median value, the edges of the boxes represent the first and third quartiles, and the whiskers extend to the most extreme data point which is no more than 1.5 times the interquartile range from the box.

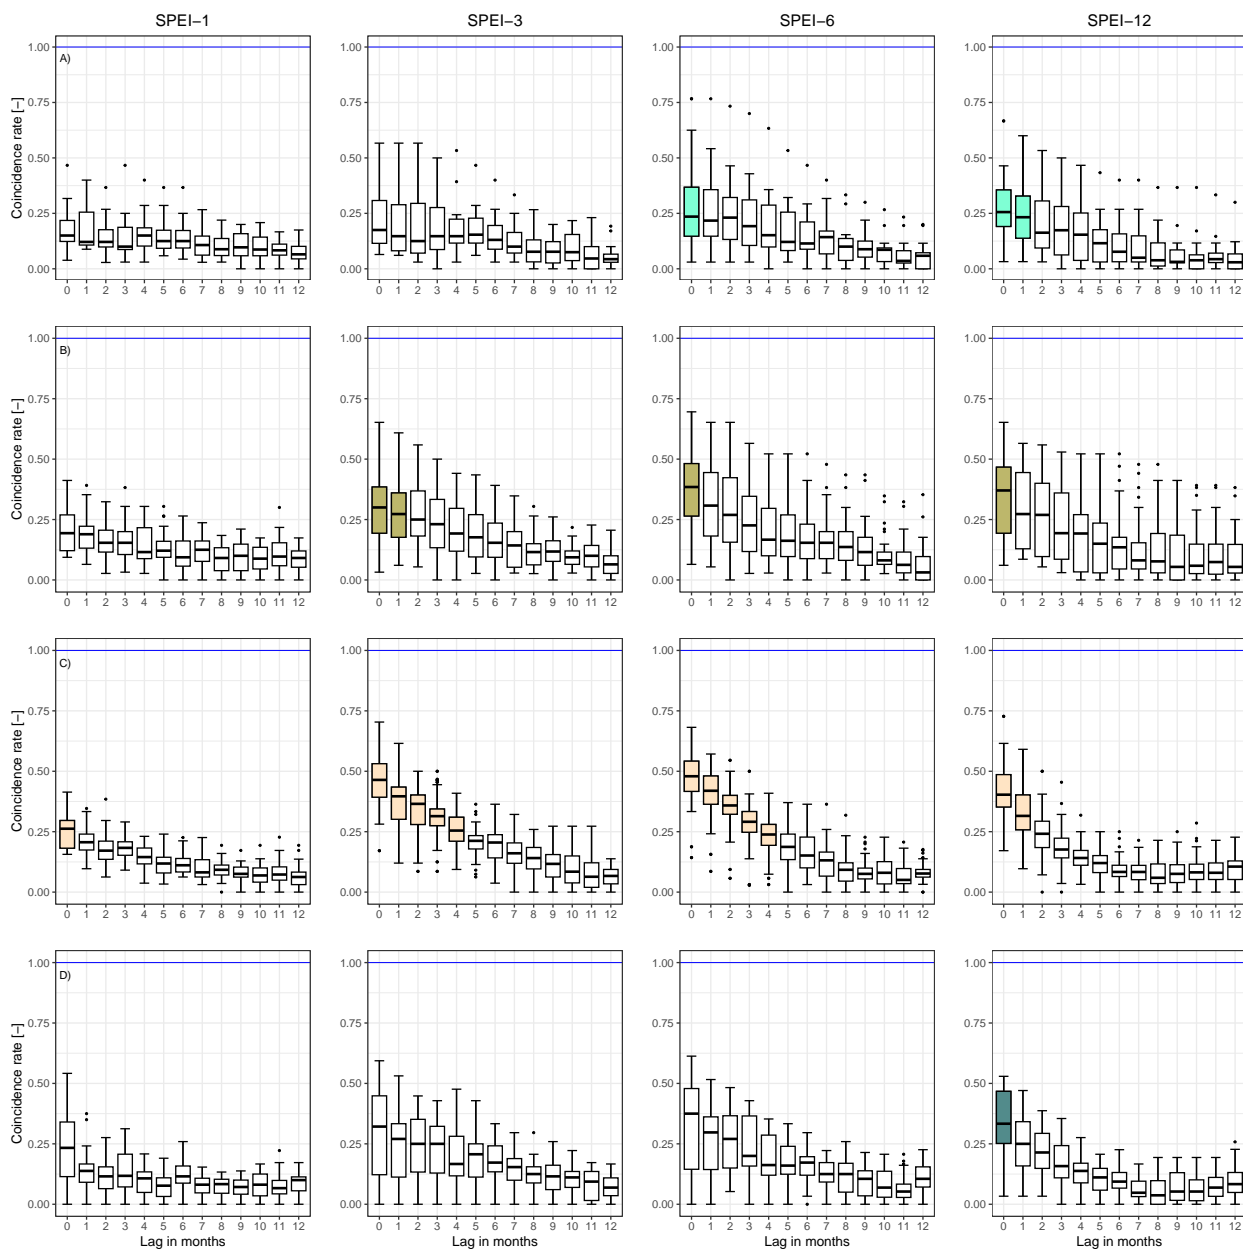

**Figure S29.** Event coincidence analysis results of the SPEI and the SSI-1 for severe droughts at different lag periods (ranging from 0 to 12 months) for *i*) snow-dominated (a); *ii*) nivo-pluvial (b); *iii*) pluvio-nival (c); and *iv*) rain-dominated (d) catchments. The solid coloured boxplots indicate those lags where at least 75% of the catchments presented significant results at the 95% confidence interval, while the white boxplots indicate the opposite. The blue line indicates the optimal cross-correlation. The solid line within each box represents the median value, the edges of the boxes represent the first and third quartiles, and the whiskers extend to the most extreme data point which is no more than 1.5 times the interquartile range from the box.

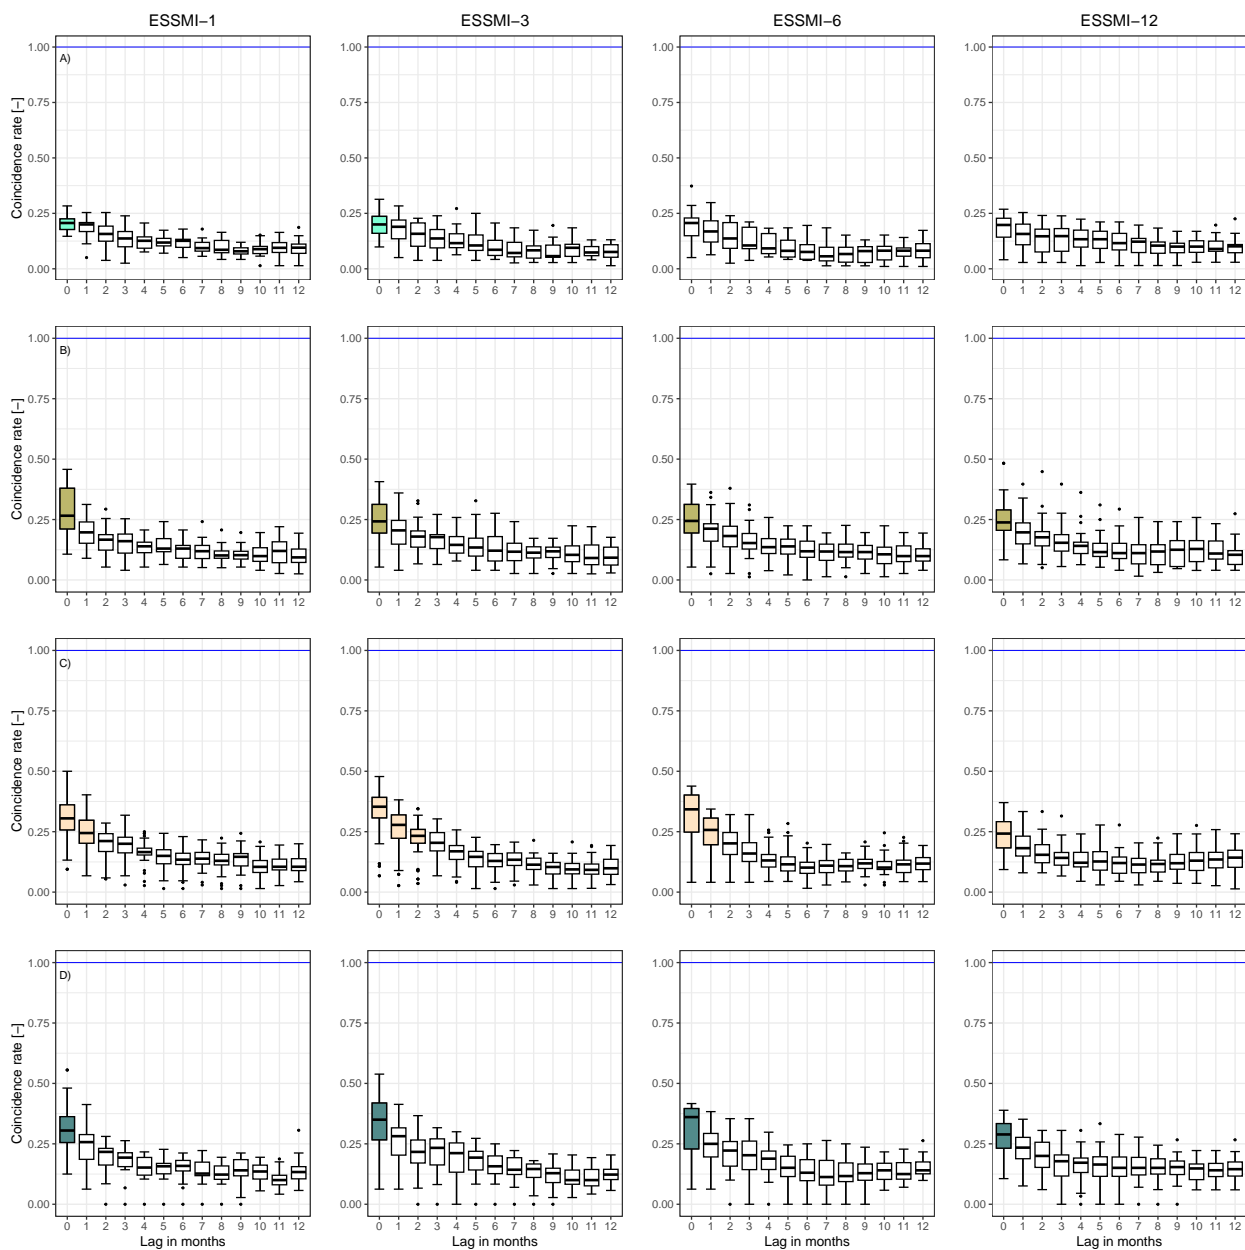

**Figure S30.** Event coincidence analysis results of the ESSMI and the SSI-1 for moderate droughts at different lag periods (ranging from 0 to 12 months) for *i*) snow-dominated (a); *ii*) nivo-pluvial (b); *iii*) pluvio-nival (c); and *iv*) rain-dominated (d) catchments. The solid coloured boxplots indicate those lags where at least 75% of the catchments presented significant results at the 95% confidence interval, while the white boxplots indicate the opposite. The blue line indicates the optimal cross-correlation. The solid line within each box represents the median value, the edges of the boxes represent the first and third quartiles, and the whiskers extend to the most extreme data point which is no more than 1.5 times the interquartile range from the box.

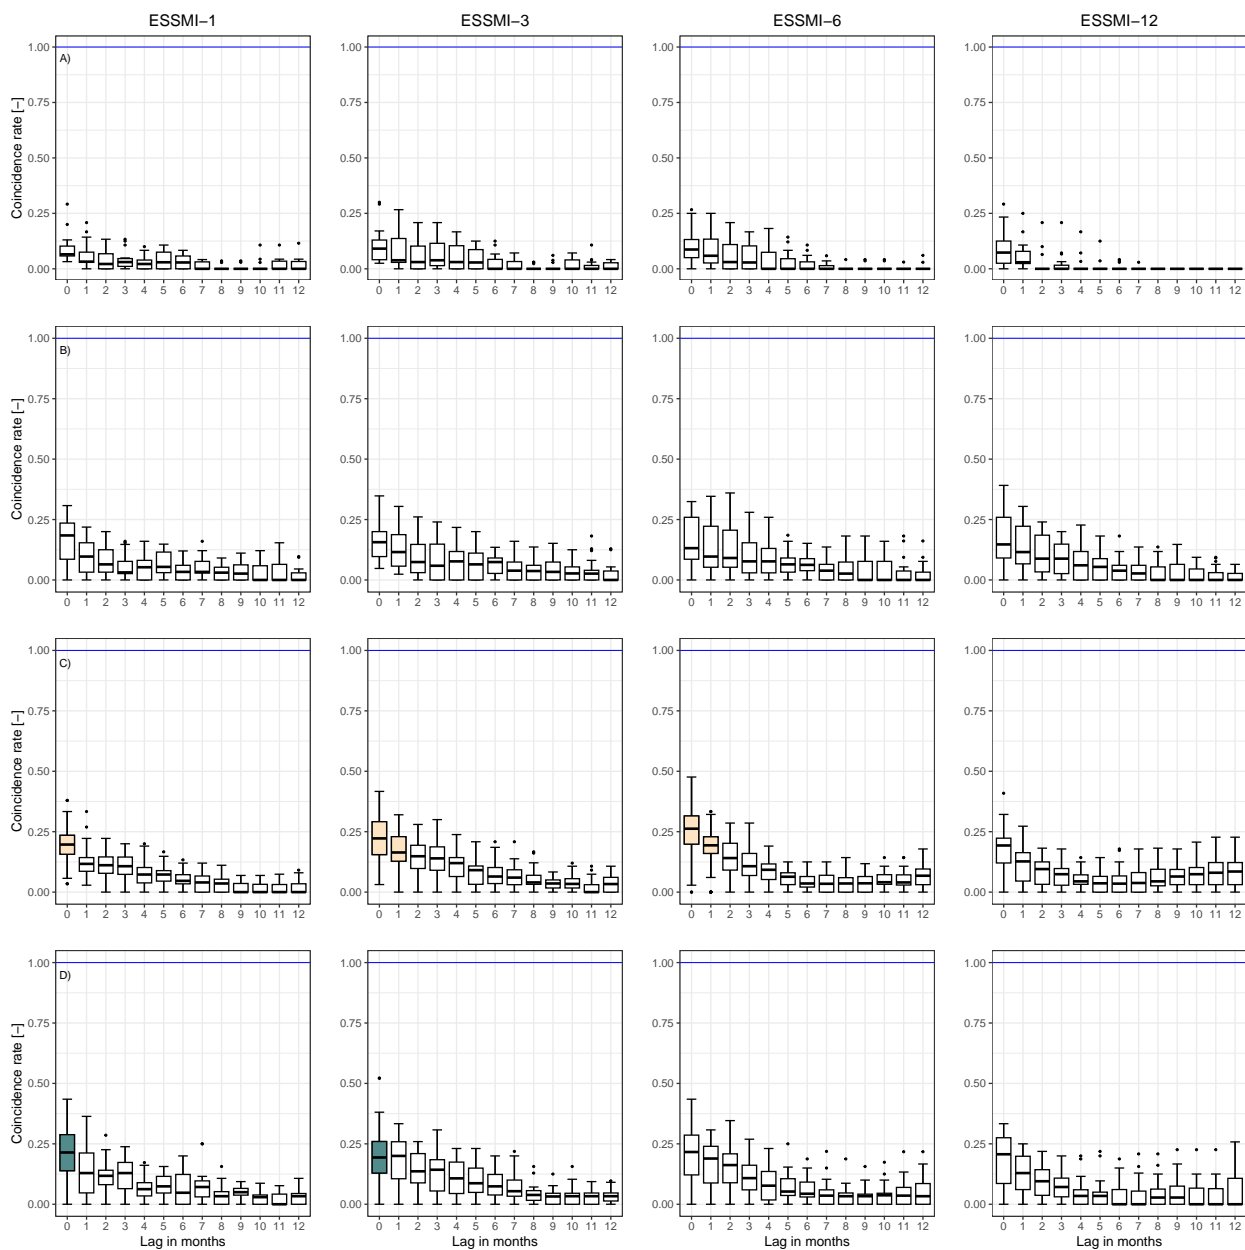

**Figure S31.** Event coincidence analysis results of the ESSMI and the SSI-1 for severe droughts at different lag periods (ranging from 0 to 12 months) for *i*) snow-dominated (a); *ii*) nivo-pluvial (b); *iii*) pluvio-nival (c); and *iv*) rain-dominated (d) catchments. The solid coloured boxplots indicate those lags where at least 75% of the catchments presented significant results at the 95% confidence interval, while the white boxplots indicate the opposite. The blue line indicates the optimal cross-correlation. The solid line within each box represents the median value, the edges of the boxes represent the first and third quartiles, and the whiskers extend to the most extreme data point which is no more than 1.5 times the interquartile range from the box.

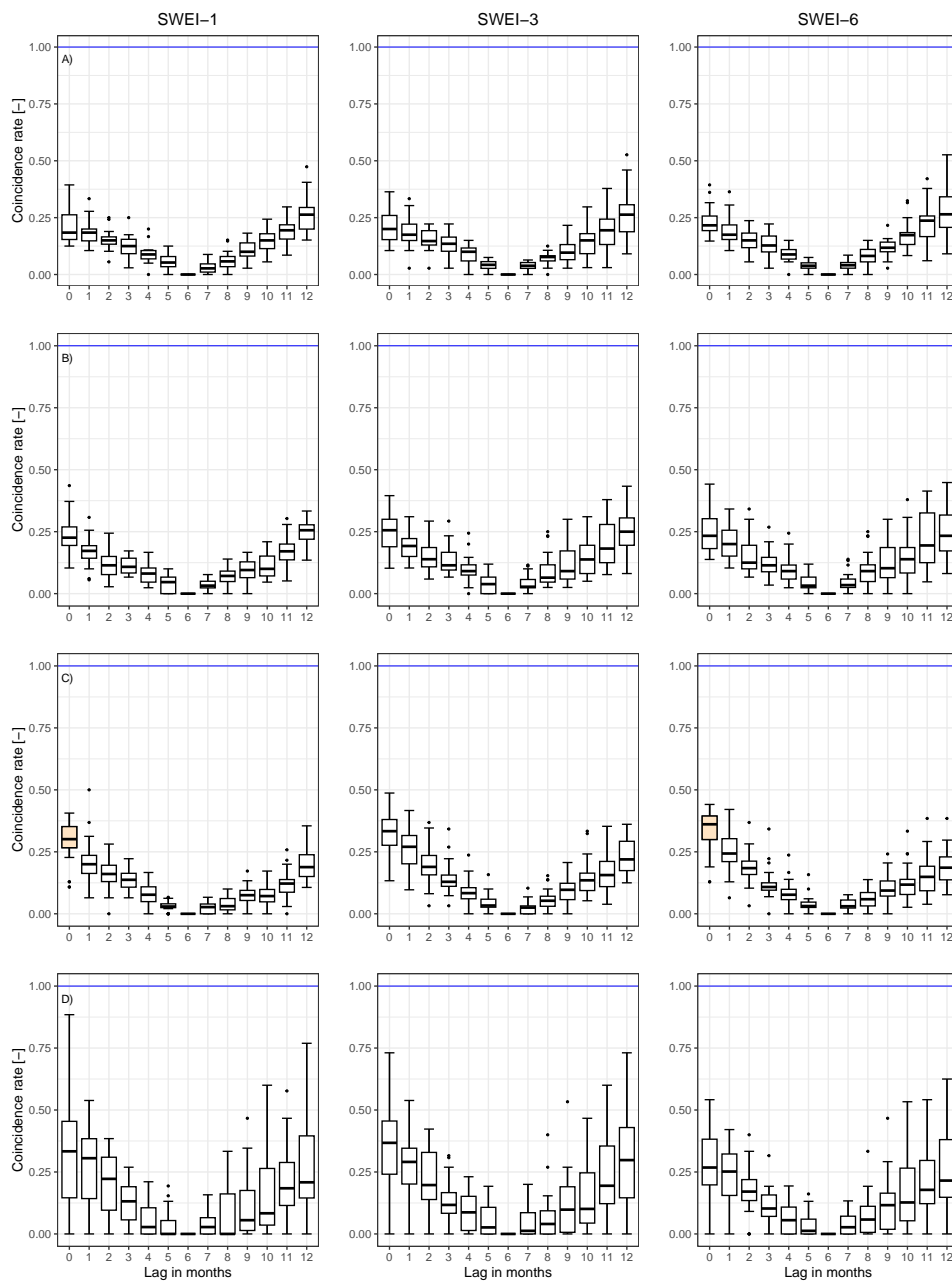

**Figure S32.** Event coincidence analysis results of the SWEI and the SSI-1 for moderate droughts at different lag periods (ranging from 0 to 12 months) for *i*) snow-dominated (a); *ii*) pluvio-pluvial (b); *iii*) pluvio-nival (c); and *iv*) rain-dominated (d) catchments. The solid coloured boxplots indicate those lags where at least 75% of the catchments presented significant results at the 95% confidence interval, while the white boxplots indicate the opposite. The blue line indicates the optimal cross-correlation. The solid line within each box represents the median value, the edges of the boxes represent the first and third quartiles, and the whiskers extend to the most extreme data point which is no more than 1.5 times the interquartile range from the box.

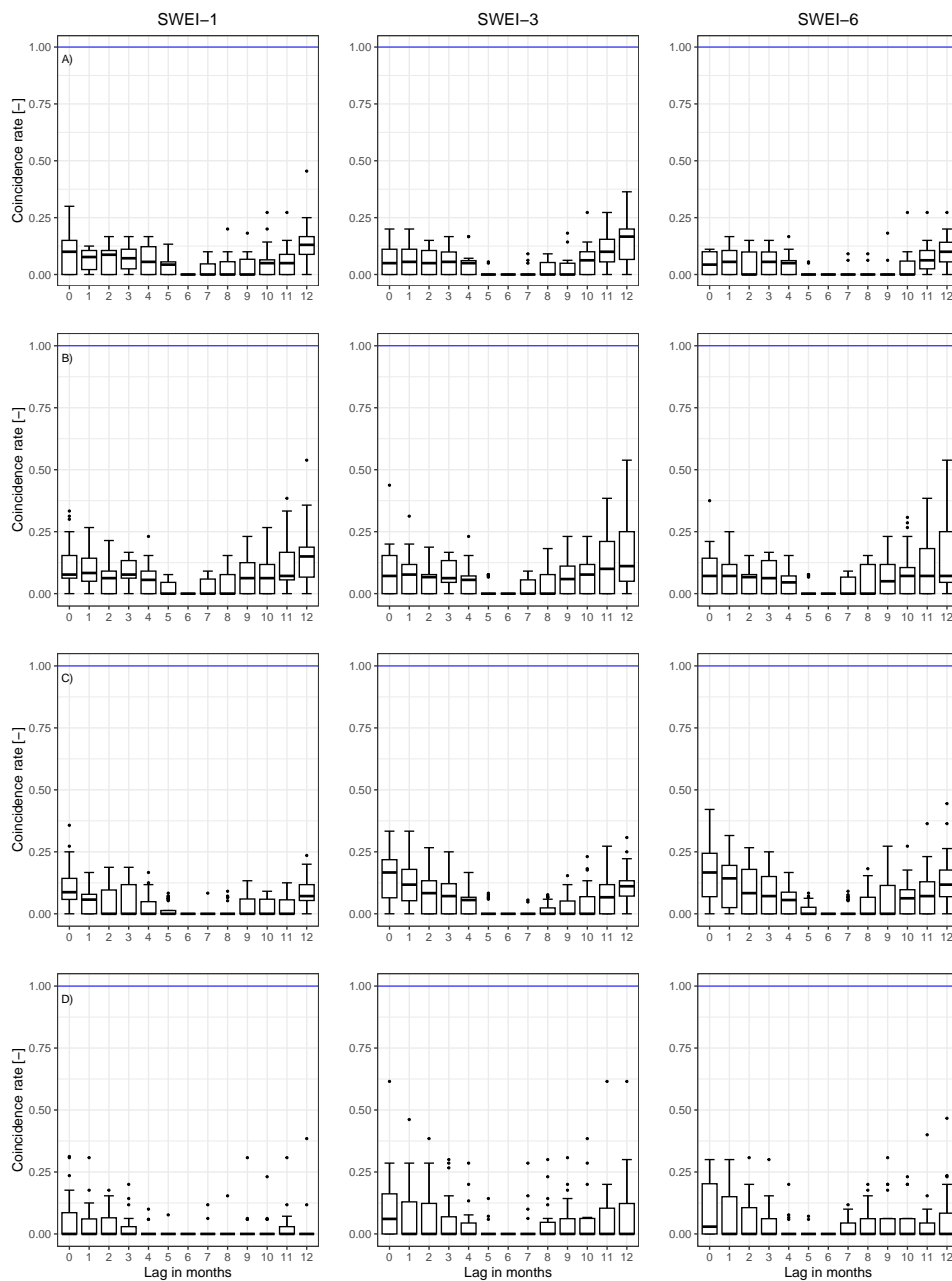

**Figure S33.** Event coincidence analysis results of the SWEI and the SSI-1 for severe droughts at different lag periods (ranging from 0 to 12 months) for *i*) snow-dominated (a); *ii*) pluvio-pluvial (b); *iii*) pluvio-nival (c); and *iv*) rain-dominated (d) catchments. The solid coloured boxplots indicate those lags where at least 75% of the catchments presented significant results at the 95% confidence interval, while the white boxplots indicate the opposite. The blue line indicates the optimal cross-correlation. The solid line within each box represents the median value, the edges of the boxes represent the first and third quartiles, and the whiskers extend to the most extreme data point which is no more than 1.5 times the interquartile range from the box.

## **7. Catchments with their hydrological regimes**



**Table S6.** Summary of the catchments used in this study with their respective hydrological regimes.

| Code      | Longitude | Latitude | Regime       | Code      | Longitude | Latitude | Regime       |
|-----------|-----------|----------|--------------|-----------|-----------|----------|--------------|
| X01310002 | -69.8114  | -18.5844 | Pluvial      | X08304001 | -71.2333  | -38.4333 | Pluvio-nival |
| X01410004 | -69.6669  | -18.8269 | Pluvial      | X09122002 | -71.8658  | -38.4508 | Pluvio-nival |
| X01730003 | -68.9297  | -19.8642 | Pluvial      | X09127001 | -72.4167  | -38.6167 | Pluvio-nival |
| X02101001 | -68.6622  | -21.6558 | Pluvial      | X09129002 | -72.5028  | -38.6867 | Pluvio-nival |
| X03430003 | -69.9747  | -28.0003 | Nivo-pluvial | X09140001 | -72.9469  | -38.78   | Pluvio-nival |
| X03414001 | -69.9408  | -28.0858 | Nival        | X09134001 | -72.3333  | -38.85   | Pluvio-nival |
| X04314002 | -70.5525  | -29.9781 | Nival        | X09135001 | -72.6167  | -38.85   | Pluvio-nival |
| X04313001 | -70.4344  | -30.1222 | Nival        | X09402001 | -71.7336  | -38.8653 | Pluvio-nival |
| X04311001 | -70.4928  | -30.2206 | Nival        | X09404001 | -72.2333  | -38.9833 | Pluvio-nival |
| X04501001 | -70.5361  | -30.4622 | Nival        | X09437002 | -73.0828  | -39.0144 | Pluvio-nival |
| X04523002 | -70.9244  | -30.7047 | Nivo-pluvial | X09405001 | -72.0833  | -39.0333 | Pluvio-nival |
| X04522002 | -70.8728  | -30.7081 | Pluvio-nival | X09434001 | -72.6833  | -39.1    | Pluvio-nival |
| X04520001 | -70.4389  | -30.7436 | Nival        | X09433001 | -72.6667  | -39.15   | Pluvio-nival |
| X04514001 | -70.6128  | -30.8128 | Nival        | X09416001 | -71.8244  | -39.2561 | Pluvio-nival |
| X04515002 | -70.7694  | -30.8422 | Pluvio-nival | X09420001 | -72.2333  | -39.2667 | Pluvio-nival |
| X04513001 | -70.7731  | -30.9242 | Nival        | X09414001 | -71.7667  | -39.3333 | Pluvio-nival |
| X04511002 | -70.5811  | -31.0117 | Nival        | X09412001 | -71.5808  | -39.36   | Pluvio-nival |
| X04512001 | -70.6644  | -31.0119 | Nival        | X10134001 | -72.9     | -39.55   | Pluvial      |
| X04531002 | -71.0403  | -31.0325 | Nivo-pluvial | X10137001 | -72.95    | -39.6675 | Pluvial      |
| X04530001 | -70.885   | -31.1119 | Nivo-pluvial | X10102001 | -71.8497  | -39.7267 | Pluvio-nival |
| X04533002 | -70.9908  | -31.2656 | Pluvial      | X10111001 | -72.475   | -39.7667 | Pluvio-nival |
| X04712001 | -70.7158  | -31.6958 | Nivo-pluvial | X10121001 | -72.825   | -39.8583 | Pluvial      |
| X04703002 | -70.5944  | -31.9667 | Nival        | X10304001 | -72.2667  | -40.25   | Pluvio-nival |
| X05101001 | -70.7564  | -32.0708 | Nivo-pluvial | X10306001 | -72.2333  | -40.2667 | Pluvio-nival |
| X05100001 | -70.7119  | -32.2253 | Nivo-pluvial | X10328001 | -73.0022  | -40.3842 | Pluvio-nival |
| X05200001 | -70.7381  | -32.33   | Nivo-pluvial | X10364001 | -73.2833  | -40.5167 | Pluvial      |
| X05411001 | -70.5403  | -32.9164 | Pluvio-nival | X10362001 | -73.0594  | -40.6181 | Pluvial      |
| X05721001 | -70.3636  | -33.3414 | Nival        | X10356001 | -73.2278  | -40.7136 | Pluvial      |
| X06027001 | -70.8739  | -34.6867 | Nivo-pluvial | X10363002 | -73.1333  | -40.8856 | Pluvial      |
| X07103001 | -70.8094  | -34.9983 | Nivo-pluvial | X10343001 | -72.7     | -40.9333 | Pluvial      |
| X07116001 | -71.0911  | -35.1731 | Pluvial      | X10411002 | -73.0667  | -41.3833 | Pluvial      |
| X07372001 | -71.3847  | -35.1783 | Pluvial      | X11141001 | -71.5478  | -44.5936 | Nivo-pluvial |
| X07115001 | -71.0156  | -35.2744 | Nivo-pluvial | X11143001 | -71.8083  | -44.6592 | Nivo-pluvial |
| X07112001 | -71.0028  | -35.2783 | Nivo-pluvial | X11143002 | -72.7167  | -44.75   | Nivo-pluvial |
| X07374001 | -71.2933  | -35.4856 | Pluvio-nival | X11302001 | -72.1167  | -45.15   | Nivo-pluvial |
| X07354002 | -71.4419  | -36.0028 | Pluvio-nival | X11307001 | -72.2333  | -45.2333 | Nivo-pluvial |
| X07350003 | -71.3375  | -36.2558 | Pluvio-nival | X11308001 | -72.4667  | -45.3833 | Nivo-pluvial |
| X07330001 | -71.6233  | -36.3758 | Pluvio-nival | X12284003 | -72.4833  | -51.0167 | Nival        |
| X08117005 | -72.3167  | -36.6167 | Pluvio-nival | X12284002 | -72.4833  | -51.0167 | Nival        |
| X08135002 | -72.45    | -36.65   | Pluvio-nival | X12284006 | -72.5169  | -51.0508 | Nival        |
| X08104001 | -71.2739  | -36.6653 | Nivo-pluvial | X12284007 | -72.5167  | -51.25   | Nival        |
| X08132001 | -72.3333  | -36.8667 | Pluvio-nival | X12285001 | -72.4667  | -51.45   | Pluvio-nival |
| X08130002 | -71.5756  | -36.9244 | Pluvio-nival | X12600001 | -71.9414  | -52.03   | Nivo-pluvial |
| X08124002 | -72.1833  | -37.0667 | Pluvio-nival | X12452001 | -71.9747  | -52.5492 | Nivo-pluvial |
| X08123001 | -72.0667  | -37.15   | Pluvial      | X12802001 | -69.2772  | -52.7681 | Pluvial      |
| X08334001 | -72.5903  | -37.5503 | Pluvio-nival | X12805001 | -69.7536  | -52.8497 | Pluvial      |
| X08317001 | -71.9017  | -37.7106 | Pluvio-nival | X12586001 | -70.9875  | -53.1381 | Nivo-pluvial |
| X08342001 | -72.3833  | -37.85   | Pluvio-nival | X12585001 | -70.9789  | -53.2789 | Nivo-pluvial |
| X08351001 | -72.4361  | -37.9647 | Pluvio-nival | X12582001 | -70.9667  | -53.65   | Nivo-pluvial |
| X09123001 | -72.0106  | -38.4303 | Pluvio-nival | X12876001 | -68.8844  | -53.8928 | Nivo-pluvial |

## References

- Baez-Villanueva, O. M., Zambrano-Bigiarini, M., Mendoza, P. A., McNamara, I., Beck, H. E., Thurner, J., Nauditt, A., Ribbe, L., and Thinh, N. X.: On the selection of precipitation products for the regionalisation of hydrological model parameters, *Hydrology and Earth System Sciences*, 25, 5805–5837, 2021.
- Beck, H. E., Van Dijk, A. I., Levizzani, V., Schellekens, J., Miralles, D. G., Martens, B., and Roo, A. d.: MSWEP: 3-hourly 0.25 global gridded precipitation (1979–2015) by merging gauge, satellite, and reanalysis data, *Hydrology and Earth System Sciences*, 21, 589–615, 2017.
- Beck, H. E., Pan, M., Miralles, D. G., Reichle, R. H., Dorigo, W. A., Hahn, S., Sheffield, J., Karthikeyan, L., Balsamo, G., Parinussa, R. M., et al.: Evaluation of 18 satellite-and model-based soil moisture products using in situ measurements from 826 sensors, *Hydrology and Earth System Sciences*, 25, 17–40, 2021.
- Chan, S. K., Bindlish, R., O’Neill, P. E., Njoku, E., Jackson, T., Colliander, A., Chen, F., Burgin, M., Dunbar, S., Piepmeier, J., et al.: Assessment of the SMAP passive soil moisture product, *IEEE Transactions on Geoscience and Remote Sensing*, 54, 4994–5007, 2016.
- Entekhabi, D., Njoku, E. G., O’Neill, P. E., Kellogg, K. H., Crow, W. T., Edelstein, W. N., Entin, J. K., Goodman, S. D., Jackson, T. J., Johnson, J., et al.: The soil moisture active passive (SMAP) mission, *Proceedings of the IEEE*, 98, 704–716, 2010.
- Entekhabi, D., Yueh, S., O’Neill, P. E., Kellogg, K. H., Allen, A., Bindlish, R., Brown, M., Chan, S., Colliander, A., Crow, W. T., et al.: SMAP handbook–soil moisture active passive: Mapping soil moisture and freeze/thaw from space, 2014.
- Hersbach, H., Bell, B., Berrisford, P., Hirahara, S., Horányi, A., Muñoz-Sabater, J., Nicolas, J., Peubey, C., Radu, R., Schepers, D., et al.: The ERA5 global reanalysis, *Quarterly Journal of the Royal Meteorological Society*, 146, 1999–2049, 2020.
- Mohammed, P. N., Aksoy, M., Piepmeier, J. R., Johnson, J. T., and Bringer, A.: SMAP L-band microwave radiometer: RFI mitigation prelaunch analysis and first year on-orbit observations, *IEEE Transactions on Geoscience and Remote Sensing*, 54, 6035–6047, 2016.
- Muñoz-Sabater, J., Dutra, E., Agustí-Panareda, A., Albergel, C., Arduini, G., Balsamo, G., Boussetta, S., Choulga, M., Harrigan, S., Hersbach, H., et al.: ERA5-Land: A state-of-the-art global reanalysis dataset for land applications, *Earth System Science Data*, 13, 4349–4383, 2021.
- Oliva, R., Daganzo, E., Kerr, Y. H., Mecklenburg, S., Nieto, S., Richaume, P., and Gruhier, C.: SMOS radio frequency interference scenario: Status and actions taken to improve the RFI environment in the 1400–1427-MHz passive band, *IEEE Transactions on Geoscience and Remote Sensing*, 50, 1427–1439, 2012.
- O’Neill, P., Chan, S., Njoku, E., Jackson, T., Bindlish, R., and Chaubell, J.: SMAP enhanced L3 radiometer global daily 9 km EASE-grid soil moisture, version 3, NASA National Snow and Ice Data Center Distributed Active Archive Center, Boulder, Colorado USA, 2016.
- Reichle, R., De Lannoy, G., Koster, R. D., Crow, W. T., Kimball, J. S., and Liu, Q.: SMAP L4 global 3-hourly 9 km EASE-grid surface and root zone soil moisture geophysical data, version 4, NASA National Snow and Ice data center distributed active archive center, 10, 2018.
- Tavakol, A., Rahmani, V., Quiring, S. M., and Kumar, S. V.: Evaluation analysis of NASA SMAP L3 and L4 and SPoRT-LIS soil moisture data in the United States, *Remote Sensing of Environment*, 229, 234–246, 2019.
